# Supplementary material for: Evaluation of the extent of damage to the esophageal wall caused by press-through package ingestion
Source: PeerJ. 2019 Apr 18;7:e6763. doi: 10.7717/peerj.6763 (PMC6475578; doi:10.7717/peerj.6763)
Supplement: Dataset S2 — Condition; scratch over a distance of 50 mm at a speed of 0.8 mm/min while changing the normal load from 0 g to 800 g, 3 times for the silicone sheet. [file peerj-07-6763-s019.xlsx]

## Sheet: data1
Time[ms]	Load[g]	Frictional force 1[gf]	Frictional force 2[gf]	Frictional force 3[gf]	Average Frictional Force [gf]	COF
0	0	0.244	-3.784	-3.54	-2.36	#DIV/0!	r	0.99902	b	-16.3562
1	0	0.854	-2.075	-3.052	-1.42433	#DIV/0!	a	0.588816
2	0	0.732	8.911	6.836	5.493	#DIV/0!
3	0	0.61	-2.563	-2.319	-1.424	#DIV/0!
4	0.1	1.099	-3.418	-3.418	-1.91233	-19.1233
5	0.1	0.732	-2.686	-2.563	-1.50567	-15.0567
6	0.1	0.732	-2.319	-2.686	-1.42433	-14.2433
7	0.1	1.343	-1.709	-2.686	-1.01733	-10.1733
8	0.1	1.221	-2.686	-2.808	-1.42433	-14.2433
9	0.1	0.977	-2.563	-3.174	-1.58667	-15.8667
10	0.1	-0.244	-3.052	-3.052	-2.116	-21.16
11	0.1	0.854	-2.197	-2.93	-1.42433	-14.2433
12	0.2	0.977	-2.93	-2.93	-1.62767	-8.13833
13	0.2	0.366	-2.563	-3.784	-1.99367	-9.96833
14	0.2	1.221	-3.052	-1.953	-1.26133	-6.30667
15	0.2	0.61	-3.296	-1.953	-1.54633	-7.73167
16	0.2	0.732	-3.54	-3.54	-2.116	-10.58
17	0.2	0.488	-2.808	-3.296	-1.872	-9.36
18	0.2	0.61	-2.319	-2.563	-1.424	-7.12
19	0.2	0.61	-2.563	-2.319	-1.424	-7.12
20	0.3	1.221	-2.93	-3.052	-1.587	-5.29
21	0.3	0.488	-3.052	-3.052	-1.872	-6.24
22	0.3	0.977	-2.93	-2.563	-1.50533	-5.01778
23	0.3	0.366	-1.953	-2.441	-1.34267	-4.47556
24	0.3	0.366	-3.052	-3.296	-1.994	-6.64667
25	0.3	0.732	-2.319	-2.686	-1.42433	-4.74778
26	0.3	1.465	-2.319	-2.808	-1.22067	-4.06889
27	0.3	1.343	-2.93	-3.174	-1.587	-5.29
28	0.4	0.977	-3.174	-2.808	-1.66833	-4.17083
29	0.4	1.099	-3.54	-2.441	-1.62733	-4.06833
30	0.4	1.099	-2.808	-2.441	-1.38333	-3.45833
31	0.4	0.854	-2.319	-3.052	-1.50567	-3.76417
32	0.4	1.587	-1.831	-2.808	-1.01733	-2.54333
33	0.4	1.221	-2.563	-2.686	-1.34267	-3.35667
34	0.4	1.099	-2.563	-2.808	-1.424	-3.56
35	0.4	0.488	-3.052	-2.563	-1.709	-4.2725
36	0.5	0.488	-2.808	-3.174	-1.83133	-3.66267
37	0.5	0.732	-3.296	-3.296	-1.95333	-3.90667
38	0.5	0.977	-2.075	-2.563	-1.22033	-2.44067
39	0.5	0.61	-1.953	-2.93	-1.42433	-2.84867
40	0.5	0.854	-2.075	-3.296	-1.50567	-3.01133
41	0.5	1.099	-2.319	-3.052	-1.424	-2.848
42	0.5	1.465	-3.052	-2.808	-1.465	-2.93
43	0.6	0.488	-2.563	-2.686	-1.587	-2.645
44	0.6	1.587	-3.174	-3.174	-1.587	-2.645
45	0.6	0.854	-2.319	-2.808	-1.42433	-2.37389
46	0.6	1.099	-2.563	-2.441	-1.30167	-2.16944
47	0.6	0.488	-3.418	-2.808	-1.91267	-3.18778
48	0.6	0.732	-2.563	-3.906	-1.91233	-3.18722
49	0.6	1.099	-2.686	-3.052	-1.54633	-2.57722
50	0.6	2.319	-1.709	-3.418	-0.936	-1.56
51	0.7	1.221	-2.441	-3.296	-1.50533	-2.15048
52	0.7	0.488	-2.197	-2.319	-1.34267	-1.9181
53	0.7	0.977	-2.93	-2.808	-1.587	-2.26714
54	0.7	1.221	-3.174	-2.319	-1.424	-2.03429
55	0.7	1.099	-3.174	-3.418	-1.831	-2.61571
56	0.7	0.244	-2.441	-3.54	-1.91233	-2.7319
57	0.7	0.977	-2.686	-3.174	-1.62767	-2.32524
58	0.7	0.61	-3.296	-3.296	-1.994	-2.84857
59	0.8	1.099	-2.441	-2.808	-1.38333	-1.72917
60	0.8	0.488	-3.296	-3.784	-2.19733	-2.74667
61	0.8	0.977	-2.686	-3.418	-1.709	-2.13625
62	0.8	1.709	-2.686	-3.418	-1.465	-1.83125
63	0.8	1.709	-2.441	-3.418	-1.38333	-1.72917
64	0.8	1.099	-2.197	-2.93	-1.34267	-1.67833
65	0.8	0.977	-2.808	-3.052	-1.62767	-2.03458
66	0.8	0.977	-3.418	-3.418	-1.953	-2.44125
67	0.9	1.709	-2.197	-2.808	-1.09867	-1.22074
68	0.9	0.977	-3.296	-2.808	-1.709	-1.89889
69	0.9	0.122	-2.808	-3.662	-2.116	-2.35111
70	0.9	1.465	-3.174	-3.174	-1.62767	-1.80852
71	0.9	1.343	-2.808	-2.197	-1.22067	-1.3563
72	0.9	0.977	-2.686	-2.319	-1.34267	-1.49185
73	0.9	0.732	-3.54	-4.395	-2.401	-2.66778
74	0.9	0.854	-3.296	-3.052	-1.83133	-2.03481
75	1	0.854	-3.54	-2.93	-1.872	-1.872
76	1	0.366	-2.563	-2.93	-1.709	-1.709
77	1	0.488	-2.93	-3.296	-1.91267	-1.91267
78	1	0.488	-3.784	-2.93	-2.07533	-2.07533
79	1	0.977	-2.93	-3.052	-1.66833	-1.66833
80	1	0.366	-3.296	-3.418	-2.116	-2.116
81	1	0.244	-2.686	-3.54	-1.994	-1.994
82	1	0.244	-2.686	-2.808	-1.75	-1.75
83	1.1	0.122	-2.563	-2.686	-1.709	-1.55364
84	1.1	0.244	-2.686	-2.319	-1.587	-1.44273
85	1.1	0.244	-3.296	-2.93	-1.994	-1.81273
86	1.1	0.366	-2.808	-2.93	-1.79067	-1.62788
87	1.1	0.732	-3.296	-3.54	-2.03467	-1.8497
88	1.1	0.488	-2.197	-2.93	-1.54633	-1.40576
89	1.1	0	-2.441	-3.418	-1.953	-1.77545
90	1.2	0.366	-2.319	-3.052	-1.66833	-1.39028
91	1.2	0.854	-2.93	-3.052	-1.70933	-1.42444
92	1.2	0.854	-2.686	-2.808	-1.54667	-1.28889
93	1.2	0.732	-1.831	-4.272	-1.79033	-1.49194
94	1.2	0.854	-2.808	-3.906	-1.95333	-1.62778
95	1.2	0.122	-2.563	-3.906	-2.11567	-1.76306
96	1.2	0.366	-2.808	-2.808	-1.75	-1.45833
97	1.2	0.854	-2.93	-3.174	-1.75	-1.45833
98	1.3	0.122	-3.784	-3.052	-2.238	-1.72154
99	1.3	0.122	-2.197	-3.784	-1.953	-1.50231
100	1.3	0.122	-1.587	-3.418	-1.62767	-1.25205
101	1.3	0.366	-2.441	-2.93	-1.66833	-1.28333
102	1.3	0.977	-1.709	-2.808	-1.18	-0.907692
103	1.3	0.61	-2.319	-2.808	-1.50567	-1.15821
104	1.3	0.61	-2.808	-2.441	-1.54633	-1.18949
105	1.3	0.122	-2.441	-2.563	-1.62733	-1.25179
106	1.4	0.732	-1.953	-3.784	-1.66833	-1.19167
107	1.4	0.61	-1.953	-3.052	-1.465	-1.04643
108	1.4	0.61	-1.709	-3.174	-1.42433	-1.01738
109	1.4	0.732	-2.197	-2.686	-1.38367	-0.988333
110	1.4	0.977	-1.343	-3.906	-1.424	-1.01714
111	1.4	0.854	-1.709	-3.296	-1.38367	-0.988333
112	1.4	0.61	-1.709	-2.808	-1.30233	-0.930238
113	1.4	0.732	-1.221	-3.174	-1.221	-0.872143
114	1.5	0.366	-0.854	-3.54	-1.34267	-0.895111
115	1.5	1.099	-0.977	-2.563	-0.813667	-0.542444
116	1.5	1.465	-1.099	-2.563	-0.732333	-0.488222
117	1.5	0.732	-0.854	-2.686	-0.936	-0.624
118	1.5	1.465	0	-2.319	-0.284667	-0.189778
119	1.5	0.61	-0.122	-3.296	-0.936	-0.624
120	1.5	0.732	-0.366	-2.563	-0.732333	-0.488222
121	1.5	0.977	0.122	-1.953	-0.284667	-0.189778
122	1.6	1.343	0.61	-1.831	0.0406667	0.0254167
123	1.6	1.221	0.488	-1.587	0.0406667	0.0254167
124	1.6	1.343	0.488	-2.563	-0.244	-0.1525
125	1.6	1.709	1.099	-2.93	-0.0406667	-0.0254167
126	1.6	1.953	1.953	-2.319	0.529	0.330625
127	1.6	2.563	2.197	-2.563	0.732333	0.457708
128	1.6	2.563	0.732	-2.686	0.203	0.126875
129	1.7	2.686	1.709	-2.686	0.569667	0.335098
130	1.7	2.075	1.099	-2.563	0.203667	0.119804
131	1.7	2.93	1.465	-2.441	0.651333	0.383137
132	1.7	3.052	2.075	-2.808	0.773	0.454706
133	1.7	2.563	1.953	-2.563	0.651	0.382941
134	1.7	3.174	1.831	-2.197	0.936	0.550588
135	1.7	2.93	1.587	-1.953	0.854667	0.502745
136	1.7	2.808	2.075	-2.563	0.773333	0.454902
137	1.8	3.54	2.319	-2.075	1.26133	0.700741
138	1.8	3.296	3.174	-2.441	1.343	0.746111
139	1.8	2.93	3.174	-2.441	1.221	0.678333
140	1.8	3.54	2.441	-2.197	1.26133	0.700741
141	1.8	3.54	3.052	-1.831	1.587	0.881667
142	1.8	3.54	2.686	-1.099	1.709	0.949444
143	1.8	4.15	3.052	-1.221	1.99367	1.10759
144	1.8	4.028	3.296	-1.343	1.99367	1.10759
145	1.9	3.662	3.662	-1.465	1.953	1.02789
146	1.9	4.272	3.662	-0.732	2.40067	1.26351
147	1.9	3.784	3.418	-0.977	2.075	1.09211
148	1.9	4.517	3.418	-0.244	2.56367	1.3493
149	1.9	4.272	4.028	-0.61	2.56333	1.34912
150	1.9	3.906	3.662	-0.244	2.44133	1.28491
151	1.9	3.784	4.028	-0.122	2.56333	1.34912
152	1.9	4.395	4.639	0.488	3.174	1.67053
153	2	4.15	4.028	0.366	2.848	1.424
154	2	5.249	4.883	0.488	3.54	1.77
155	2	5.249	5.127	0.366	3.58067	1.79033
156	2	6.47	5.005	0	3.825	1.9125
157	2	5.859	5.493	-0.244	3.70267	1.85133
158	2	5.859	5.737	0.366	3.98733	1.99367
159	2	5.615	4.883	0.488	3.662	1.831
160	2	6.226	5.005	1.709	4.31333	2.15667
161	2.1	5.981	4.517	1.099	3.86567	1.84079
162	2.1	5.859	4.883	0.977	3.90633	1.86016
163	2.1	5.981	5.249	1.099	4.10967	1.95698
164	2.1	6.348	5.493	1.465	4.43533	2.11206
165	2.1	6.226	5.737	2.075	4.67933	2.22825
166	2.1	6.836	5.859	1.953	4.88267	2.32508
167	2.1	6.47	6.348	1.953	4.92367	2.3446
168	2.2	6.592	5.859	1.831	4.76067	2.16394
169	2.2	7.813	6.104	1.465	5.12733	2.33061
170	2.2	5.615	5.737	1.587	4.313	1.96045
171	2.2	6.348	5.981	1.099	4.476	2.03455
172	2.2	6.836	5.859	2.075	4.92333	2.23788
173	2.2	5.859	5.493	1.831	4.39433	1.99742
174	2.2	6.958	6.592	2.563	5.371	2.44136
175	2.2	6.836	6.592	2.563	5.33033	2.42288
176	2.3	6.958	6.226	2.93	5.37133	2.33536
177	2.3	6.836	6.592	2.93	5.45267	2.37072
178	2.3	7.324	7.446	2.808	5.85933	2.54754
179	2.3	7.324	6.592	3.296	5.73733	2.49449
180	2.3	8.057	6.714	2.93	5.90033	2.56536
181	2.3	7.935	6.592	3.418	5.98167	2.60072
182	2.3	7.69	6.104	3.54	5.778	2.51217
183	2.3	7.813	6.592	3.174	5.85967	2.54768
184	2.4	7.813	6.592	3.418	5.941	2.47542
185	2.4	7.813	6.836	3.54	6.063	2.52625
186	2.4	8.179	6.836	3.662	6.22567	2.59403
187	2.4	8.545	7.446	3.906	6.63233	2.76347
188	2.4	8.057	6.836	3.662	6.185	2.57708
189	2.4	8.057	7.324	4.028	6.46967	2.69569
190	2.4	8.057	7.08	4.517	6.55133	2.72972
191	2.4	8.301	7.202	4.272	6.59167	2.74653
192	2.5	8.789	6.836	4.395	6.67333	2.66933
193	2.5	8.301	6.836	4.272	6.46967	2.58787
194	2.5	9.277	7.324	3.784	6.795	2.718
195	2.5	8.667	6.958	4.272	6.63233	2.65293
196	2.5	8.911	7.202	4.517	6.87667	2.75067
197	2.5	8.911	7.202	4.517	6.87667	2.75067
198	2.5	9.155	7.813	5.005	7.32433	2.92973
199	2.5	9.033	7.446	4.15	6.87633	2.75053
200	2.6	9.399	6.592	4.272	6.75433	2.59782
201	2.6	9.766	6.958	4.15	6.958	2.67615
202	2.6	9.644	6.348	4.272	6.75467	2.59795
203	2.6	9.277	6.226	4.761	6.75467	2.59795
204	2.6	9.399	7.202	4.639	7.08	2.72308
205	2.6	9.277	6.47	4.883	6.87667	2.64487
206	2.6	9.766	7.568	5.371	7.56833	2.9109
207	2.6	9.766	5.981	5.615	7.12067	2.73872
208	2.7	9.277	6.714	5.493	7.16133	2.65235
209	2.7	9.033	7.08	5.371	7.16133	2.65235
210	2.7	9.033	6.47	5.981	7.16133	2.65235
211	2.7	8.789	6.592	6.348	7.243	2.68259
212	2.7	9.888	6.592	5.493	7.32433	2.71272
213	2.7	9.277	6.348	5.981	7.202	2.66741
214	2.7	9.033	6.958	5.981	7.324	2.71259
215	2.8	8.911	6.47	6.47	7.28367	2.60131
216	2.8	9.277	6.714	5.981	7.324	2.61571
217	2.8	8.667	6.348	6.104	7.03967	2.51417
218	2.8	9.521	7.08	6.226	7.609	2.7175
219	2.8	9.033	6.836	5.615	7.16133	2.55762
220	2.8	9.888	5.859	5.859	7.202	2.57214
221	2.8	9.155	6.104	6.226	7.16167	2.55774
222	2.8	9.521	5.615	5.981	7.039	2.51393
223	2.9	9.766	5.859	5.981	7.202	2.48345
224	2.9	8.911	5.371	5.859	6.71367	2.31506
225	2.9	9.521	6.348	5.859	7.24267	2.49747
226	2.9	9.766	5.493	6.226	7.16167	2.46954
227	2.9	9.155	5.493	6.104	6.91733	2.38529
228	2.9	9.766	5.127	5.615	6.836	2.35724
229	2.9	9.277	5.493	5.493	6.75433	2.32908
230	2.9	9.399	5.249	5.249	6.63233	2.28701
231	3	10.01	5.127	4.883	6.67333	2.22444
232	3	9.888	4.883	5.859	6.87667	2.29222
233	3	9.033	5.127	5.615	6.59167	2.19722
234	3	9.399	4.639	5.371	6.46967	2.15656
235	3	8.545	5.371	5.981	6.63233	2.21078
236	3	9.033	5.005	6.226	6.75467	2.25156
237	3	9.277	4.761	6.592	6.87667	2.29222
238	3	9.155	4.883	6.226	6.75467	2.25156
239	3.1	9.155	4.761	5.859	6.59167	2.12634
240	3.1	9.155	4.395	5.981	6.51033	2.10011
241	3.1	9.521	4.639	6.348	6.836	2.20516
242	3.1	8.911	4.272	5.859	6.34733	2.04753
243	3.1	9.399	4.517	6.47	6.79533	2.19204
244	3.1	10.254	4.395	5.981	6.87667	2.21828
245	3.1	9.277	4.883	6.592	6.91733	2.2314
246	3.1	9.155	5.127	7.08	7.12067	2.29699
247	3.2	8.789	4.639	6.104	6.51067	2.03458
248	3.2	9.399	4.272	6.836	6.83567	2.13615
249	3.2	8.667	3.906	6.348	6.307	1.97094
250	3.2	9.155	4.761	6.47	6.79533	2.12354
251	3.2	8.911	4.15	6.47	6.51033	2.03448
252	3.2	9.644	4.517	5.981	6.714	2.09813
253	3.2	9.033	4.517	6.47	6.67333	2.08542
254	3.3	9.277	4.15	5.493	6.30667	1.91111
255	3.3	9.399	4.028	6.348	6.59167	1.99747
256	3.3	9.399	3.906	6.47	6.59167	1.99747
257	3.3	9.521	3.906	6.226	6.551	1.98515
258	3.3	9.277	4.639	5.981	6.63233	2.0098
259	3.3	8.911	4.272	5.615	6.266	1.89879
260	3.3	8.667	3.662	5.493	5.94067	1.8002
261	3.3	9.399	4.395	5.371	6.38833	1.93586
262	3.4	10.132	4.517	5.981	6.87667	2.02255
263	3.4	9.521	4.028	5.859	6.46933	1.90275
264	3.4	9.521	3.906	5.127	6.18467	1.81902
265	3.4	8.789	3.418	4.761	5.656	1.66353
266	3.4	8.911	3.662	5.371	5.98133	1.75922
267	3.4	9.033	4.15	5.005	6.06267	1.78314
268	3.4	9.521	3.174	5.127	5.94067	1.74725
269	3.4	9.399	4.028	4.517	5.98133	1.75922
270	3.5	9.521	3.662	5.493	6.22533	1.77867
271	3.5	10.01	4.272	5.005	6.429	1.83686
272	3.5	9.155	4.028	4.761	5.98133	1.70895
273	3.5	9.033	4.15	4.395	5.85933	1.6741
274	3.5	9.155	3.906	5.005	6.022	1.72057
275	3.5	9.033	3.906	5.127	6.022	1.72057
276	3.5	9.033	4.272	5.737	6.34733	1.81352
277	3.5	8.057	3.418	5.981	5.81867	1.66248
278	3.6	8.789	4.15	5.127	6.022	1.67278
279	3.6	8.667	3.784	4.761	5.73733	1.5937
280	3.6	9.155	3.296	4.272	5.57433	1.54843
281	3.6	8.789	4.15	4.761	5.9	1.63889
282	3.6	8.545	4.028	5.005	5.85933	1.62759
283	3.6	8.179	3.662	5.615	5.81867	1.6163
284	3.6	8.545	3.906	4.883	5.778	1.605
285	3.6	8.179	4.395	5.127	5.90033	1.63898
286	3.7	8.301	4.028	4.883	5.73733	1.55063
287	3.7	8.301	3.662	4.883	5.61533	1.51766
288	3.7	9.033	3.662	4.517	5.73733	1.55063
289	3.7	8.423	3.906	5.005	5.778	1.56162
290	3.7	9.033	3.54	5.005	5.85933	1.5836
291	3.7	8.789	3.296	5.005	5.69667	1.53964
292	3.7	8.301	3.784	4.883	5.656	1.52865
293	3.8	8.667	3.784	4.272	5.57433	1.46693
294	3.8	8.179	3.662	4.395	5.412	1.42421
295	3.8	8.789	3.296	4.028	5.371	1.41342
296	3.8	8.423	3.174	4.517	5.37133	1.41351
297	3.8	8.911	3.54	4.639	5.69667	1.49912
298	3.8	8.057	3.54	4.15	5.249	1.38132
299	3.8	8.057	3.052	4.272	5.127	1.34921
300	3.8	8.301	3.906	3.662	5.28967	1.39202
301	3.9	8.667	3.052	4.15	5.28967	1.35632
302	3.9	9.033	3.418	4.395	5.61533	1.43983
303	3.9	7.935	2.93	4.395	5.08667	1.30427
304	3.9	8.545	2.93	4.15	5.20833	1.33547
305	3.9	8.179	2.808	3.906	4.96433	1.27291
306	3.9	7.935	3.906	4.761	5.534	1.41897
307	3.9	8.789	3.052	4.028	5.28967	1.35632
308	3.9	8.179	3.052	4.761	5.33067	1.36684
309	4	8.545	2.93	4.517	5.33067	1.33267
310	4	8.301	3.174	3.784	5.08633	1.27158
311	4	8.301	3.052	4.395	5.24933	1.31233
312	4	8.301	3.296	4.272	5.28967	1.32242
313	4	9.155	3.54	4.15	5.615	1.40375
314	4	7.935	3.418	4.883	5.412	1.353
315	4	8.301	2.808	4.761	5.29	1.3225
316	4	8.179	3.052	4.883	5.37133	1.34283
317	4.1	7.568	2.93	4.028	4.842	1.18098
318	4.1	7.813	3.54	5.005	5.45267	1.32992
319	4.1	8.545	3.906	4.761	5.73733	1.39935
320	4.1	8.667	3.296	4.639	5.534	1.34976
321	4.1	8.057	3.662	4.517	5.412	1.32
322	4.1	8.667	3.54	4.028	5.41167	1.31992
323	4.1	8.179	3.174	4.028	5.127	1.25049
324	4.1	9.033	3.54	3.54	5.371	1.31
325	4.2	8.667	4.028	3.296	5.33033	1.26913
326	4.2	8.423	3.784	4.395	5.534	1.31762
327	4.2	8.667	2.686	4.272	5.20833	1.24008
328	4.2	8.911	3.174	4.028	5.371	1.27881
329	4.2	8.911	3.174	3.296	5.127	1.22071
330	4.2	8.423	4.028	3.052	5.16767	1.2304
331	4.2	8.911	4.15	3.174	5.41167	1.28849
332	4.2	8.057	3.662	4.028	5.249	1.24976
333	4.3	9.766	3.54	3.174	5.49333	1.27752
334	4.3	8.301	3.052	3.418	4.92367	1.14504
335	4.3	8.545	3.174	4.15	5.28967	1.23016
336	4.3	8.057	3.662	3.906	5.20833	1.21124
337	4.3	7.935	3.418	3.906	5.08633	1.18287
338	4.3	9.033	3.54	3.54	5.371	1.24907
339	4.3	8.911	3.906	4.272	5.69633	1.32473
340	4.4	8.545	3.418	3.784	5.249	1.19295
341	4.4	9.277	3.662	4.15	5.69633	1.29462
342	4.4	8.911	3.174	3.662	5.249	1.19295
343	4.4	8.179	3.418	3.662	5.08633	1.15598
344	4.4	8.057	3.662	3.906	5.20833	1.18371
345	4.4	8.545	4.028	4.761	5.778	1.31318
346	4.4	8.301	3.662	4.272	5.41167	1.22992
347	4.4	8.057	3.54	4.517	5.37133	1.22076
348	4.5	8.423	3.418	5.127	5.656	1.25689
349	4.5	8.057	3.54	4.15	5.249	1.16644
350	4.5	8.301	3.784	3.906	5.33033	1.18452
351	4.5	8.667	4.028	4.272	5.65567	1.25681
352	4.5	7.935	3.296	4.272	5.16767	1.14837
353	4.5	9.033	3.906	4.272	5.737	1.27489
354	4.5	8.423	3.174	3.662	5.08633	1.1303
355	4.5	8.423	4.028	4.395	5.61533	1.24785
356	4.6	8.301	3.906	4.639	5.61533	1.22072
357	4.6	8.179	4.028	4.761	5.656	1.22957
358	4.6	8.179	3.906	5.371	5.81867	1.26493
359	4.6	8.423	3.418	4.028	5.28967	1.14993
360	4.6	8.057	3.418	4.15	5.20833	1.13225
361	4.6	8.301	4.272	4.028	5.53367	1.20297
362	4.6	8.789	4.272	4.028	5.69633	1.23833
363	4.6	8.423	4.639	4.272	5.778	1.25609
364	4.7	7.935	4.395	4.395	5.575	1.18617
365	4.7	8.423	4.639	4.15	5.73733	1.22071
366	4.7	8.789	4.15	3.54	5.493	1.16872
367	4.7	8.179	4.028	4.15	5.45233	1.16007
368	4.7	8.789	4.517	3.906	5.73733	1.22071
369	4.7	8.301	5.127	3.418	5.61533	1.19475
370	4.7	8.545	3.906	3.662	5.371	1.14277
371	4.7	8.667	4.028	3.662	5.45233	1.16007
372	4.8	8.667	4.395	4.272	5.778	1.20375
373	4.8	8.423	4.761	2.441	5.20833	1.08507
374	4.8	8.545	4.395	3.906	5.61533	1.16986
375	4.8	8.179	4.028	3.662	5.28967	1.10201
376	4.8	8.057	4.028	4.639	5.57467	1.16139
377	4.8	7.935	4.639	5.005	5.85967	1.22076
378	4.8	8.179	4.639	4.883	5.90033	1.22924
379	4.9	8.667	4.15	5.249	6.022	1.22898
380	4.9	8.423	3.784	4.517	5.57467	1.13769
381	4.9	8.301	4.395	5.127	5.941	1.21245
382	4.9	8.057	4.028	4.883	5.656	1.15429
383	4.9	8.789	4.272	4.883	5.98133	1.22068
384	4.9	8.667	4.15	5.493	6.10333	1.24558
385	4.9	8.423	4.395	4.883	5.90033	1.20415
386	4.9	8.423	4.395	3.662	5.49333	1.12109
387	5	8.911	4.761	4.883	6.185	1.237
388	5	8.667	3.906	4.883	5.81867	1.16373
389	5	8.545	4.883	5.493	6.307	1.2614
390	5	8.057	4.639	4.761	5.819	1.1638
391	5	8.789	4.517	4.517	5.941	1.1882
392	5	8.789	4.272	4.883	5.98133	1.19627
393	5	8.301	4.395	4.639	5.77833	1.15567
394	5	8.667	4.639	5.127	6.14433	1.22887
395	5.1	8.789	4.272	5.127	6.06267	1.18876
396	5.1	8.789	4.15	5.005	5.98133	1.17281
397	5.1	8.301	3.54	4.883	5.57467	1.09307
398	5.1	8.179	4.272	4.883	5.778	1.13294
399	5.1	7.324	4.639	4.639	5.534	1.0851
400	5.1	8.301	4.272	4.028	5.53367	1.08503
401	5.1	7.568	4.272	4.883	5.57433	1.09301
402	5.1	7.935	4.272	4.883	5.69667	1.11699
403	5.2	7.446	4.883	5.615	5.98133	1.15026
404	5.2	7.935	4.028	5.127	5.69667	1.09551
405	5.2	8.545	4.395	5.249	6.063	1.16596
406	5.2	8.057	4.028	5.005	5.69667	1.09551
407	5.2	8.301	4.517	4.15	5.656	1.08769
408	5.2	8.179	4.761	4.517	5.819	1.11904
409	5.2	8.179	4.15	4.883	5.73733	1.10333
410	5.2	7.935	4.028	5.249	5.73733	1.10333
411	5.3	8.301	4.15	4.639	5.69667	1.07484
412	5.3	7.935	4.028	4.761	5.57467	1.05182
413	5.3	8.179	4.15	5.127	5.81867	1.09786
414	5.3	7.568	4.395	4.517	5.49333	1.03648
415	5.3	8.179	3.784	4.761	5.57467	1.05182
416	5.3	8.301	4.395	4.028	5.57467	1.05182
417	5.3	8.423	4.15	5.371	5.98133	1.12855
418	5.4	7.69	4.15	5.249	5.69633	1.05488
419	5.4	7.935	4.028	5.127	5.69667	1.05494
420	5.4	7.813	4.15	4.761	5.57467	1.03235
421	5.4	8.301	4.028	5.005	5.778	1.07
422	5.4	8.057	3.418	5.615	5.69667	1.05494
423	5.4	7.324	4.395	5.249	5.656	1.04741
424	5.4	8.057	3.906	4.761	5.57467	1.03235
425	5.4	7.202	3.662	4.761	5.20833	0.964506
426	5.5	7.568	3.54	4.883	5.33033	0.969152
427	5.5	7.446	3.906	4.639	5.33033	0.969152
428	5.5	6.958	3.906	4.761	5.20833	0.94697
429	5.5	7.568	3.418	4.761	5.249	0.954364
430	5.5	7.324	4.517	4.761	5.534	1.00618
431	5.5	7.935	3.296	4.272	5.16767	0.939576
432	5.5	7.935	4.15	5.615	5.9	1.07273
433	5.5	7.08	3.662	5.005	5.249	0.954364
434	5.6	7.568	3.906	4.761	5.41167	0.966369
435	5.6	8.179	4.028	4.272	5.493	0.980893
436	5.6	7.935	4.15	5.005	5.69667	1.01726
437	5.6	7.202	3.418	4.517	5.04567	0.901012
438	5.6	7.324	4.639	5.127	5.69667	1.01726
439	5.6	7.202	4.15	5.005	5.45233	0.973631
440	5.6	7.324	4.395	5.005	5.57467	0.995476
441	5.6	7.324	3.54	5.127	5.33033	0.951845
442	5.7	7.446	3.54	5.371	5.45233	0.95655
443	5.7	7.202	3.052	5.737	5.33033	0.935146
444	5.7	7.568	2.93	5.249	5.249	0.920877
445	5.7	7.568	4.272	4.883	5.57433	0.977953
446	5.7	7.446	3.784	5.493	5.57433	0.977953
447	5.7	8.301	4.272	4.883	5.81867	1.02082
448	5.7	7.813	3.174	5.249	5.412	0.949474
449	5.7	7.568	3.052	4.517	5.04567	0.885205
450	5.8	7.08	3.296	5.249	5.20833	0.897989
451	5.8	7.08	3.052	4.883	5.005	0.862931
452	5.8	7.202	3.784	4.517	5.16767	0.890977
453	5.8	7.446	3.418	4.883	5.249	0.905
454	5.8	7.568	3.784	5.127	5.493	0.947069
455	5.8	7.935	3.54	4.883	5.45267	0.940115
456	5.8	7.568	3.296	4.517	5.127	0.883966
457	5.8	7.324	2.93	4.517	4.92367	0.848908
458	5.9	7.202	2.93	4.883	5.005	0.848305
459	5.9	6.958	3.906	4.761	5.20833	0.882768
460	5.9	7.446	3.174	4.761	5.127	0.868983
461	5.9	8.057	2.686	4.15	4.96433	0.841412
462	5.9	7.935	2.441	4.15	4.842	0.820678
463	5.9	7.935	2.441	5.127	5.16767	0.875876
464	5.9	7.69	2.93	4.15	4.92333	0.834463
465	6	6.714	2.563	4.517	4.598	0.766333
466	6	7.568	3.418	4.639	5.20833	0.868056
467	6	7.813	3.052	4.883	5.24933	0.874889
468	6	6.714	2.563	5.005	4.76067	0.793444
469	6	7.446	2.808	3.784	4.67933	0.779889
470	6	7.08	2.441	4.272	4.59767	0.766278
471	6	6.47	2.686	5.371	4.84233	0.807056
472	6	7.813	3.174	4.761	5.24933	0.874889
473	6.1	7.568	3.174	5.005	5.249	0.860492
474	6.1	7.813	2.441	4.272	4.842	0.79377
475	6.1	7.69	2.93	4.639	5.08633	0.833825
476	6.1	7.202	3.296	4.517	5.005	0.820492
477	6.1	7.446	2.808	5.371	5.20833	0.853825
478	6.1	7.446	2.808	5.249	5.16767	0.847158
479	6.1	7.935	2.441	4.761	5.04567	0.827158
480	6.1	8.057	3.296	5.005	5.45267	0.89388
481	6.2	7.568	2.563	4.395	4.842	0.780968
482	6.2	7.813	2.319	5.005	5.04567	0.813817
483	6.2	7.202	2.563	4.395	4.72	0.76129
484	6.2	7.813	3.052	4.883	5.24933	0.846667
485	6.2	7.446	2.808	4.517	4.92367	0.79414
486	6.2	7.324	2.441	4.272	4.679	0.754677
487	6.2	7.202	3.54	4.517	5.08633	0.820376
488	6.2	6.836	1.953	5.005	4.598	0.741613
489	6.3	7.08	1.831	4.639	4.51667	0.716931
490	6.3	6.836	2.686	4.395	4.639	0.736349
491	6.3	7.202	2.808	4.761	4.92367	0.781534
492	6.3	7.324	2.441	5.371	5.04533	0.800847
493	6.3	7.813	2.441	5.127	5.127	0.81381
494	6.3	7.08	3.052	5.005	5.04567	0.800899
495	6.3	7.202	2.563	4.639	4.80133	0.762116
496	6.3	6.836	2.319	4.395	4.51667	0.716931
497	6.4	5.859	2.808	4.639	4.43533	0.693021
498	6.4	6.836	3.418	5.005	5.08633	0.79474
499	6.4	7.08	2.563	4.395	4.67933	0.731146
500	6.4	7.568	2.441	5.005	5.00467	0.781979
501	6.4	7.446	2.808	5.127	5.127	0.801094
502	6.4	7.568	2.686	4.883	5.04567	0.788385
503	6.4	6.958	2.075	3.906	4.313	0.673906
504	6.5	6.958	2.686	4.15	4.598	0.707385
505	6.5	7.08	2.93	4.883	4.96433	0.763744
506	6.5	7.08	3.052	4.639	4.92367	0.757487
507	6.5	7.08	2.319	4.395	4.598	0.707385
508	6.5	7.202	2.319	4.639	4.72	0.726154
509	6.5	7.202	2.441	5.005	4.88267	0.751179
510	6.5	6.714	2.441	4.639	4.598	0.707385
511	6.5	7.568	2.808	5.127	5.16767	0.795026
512	6.6	7.08	2.93	5.493	5.16767	0.78298
513	6.6	7.935	2.441	5.615	5.33033	0.807626
514	6.6	7.202	2.197	4.883	4.76067	0.721313
515	6.6	7.202	2.319	5.127	4.88267	0.739798
516	6.6	6.958	2.686	5.127	4.92367	0.74601
517	6.6	7.202	2.686	6.47	5.45267	0.826162
518	6.6	7.568	2.93	5.493	5.33033	0.807626
519	6.6	8.057	2.075	6.226	5.45267	0.826162
520	6.7	7.813	2.075	6.104	5.33067	0.795622
521	6.7	7.568	2.075	5.127	4.92333	0.734826
522	6.7	8.301	2.197	5.005	5.16767	0.771294
523	6.7	7.568	2.441	5.371	5.12667	0.765174
524	6.7	7.813	2.441	5.615	5.28967	0.789502
525	6.7	8.789	2.319	5.371	5.493	0.819851
526	6.7	7.202	2.197	5.249	4.88267	0.728756
527	6.7	7.08	2.319	5.249	4.88267	0.728756
528	6.8	6.958	2.319	5.371	4.88267	0.718039
529	6.8	7.324	2.441	5.127	4.964	0.73
530	6.8	7.935	2.808	5.249	5.33067	0.783922
531	6.8	7.446	2.319	5.493	5.086	0.747941
532	6.8	7.568	2.319	5.737	5.208	0.765882
533	6.8	8.301	1.709	5.981	5.33033	0.783873
534	6.8	7.935	2.319	5.615	5.28967	0.777892
535	6.8	7.813	2.686	5.249	5.24933	0.771961
536	6.9	7.446	2.441	5.615	5.16733	0.748889
537	6.9	7.446	2.563	5.859	5.28933	0.76657
538	6.9	7.935	2.441	5.859	5.41167	0.7843
539	6.9	8.179	2.075	6.104	5.45267	0.790242
540	6.9	7.08	2.563	6.226	5.28967	0.766618
541	6.9	7.813	2.563	6.226	5.534	0.802029
542	6.9	7.446	2.808	5.981	5.41167	0.7843
543	7	7.935	2.686	6.958	5.85967	0.837095
544	7	7.813	2.686	6.348	5.61567	0.802238
545	7	7.446	2.441	5.737	5.208	0.744
546	7	7.08	2.808	5.493	5.127	0.732429
547	7	7.935	3.174	5.737	5.61533	0.80219
548	7	7.202	1.831	6.226	5.08633	0.726619
549	7	7.568	2.441	6.348	5.45233	0.778905
550	7	8.423	2.563	6.348	5.778	0.825429
551	7.1	8.423	2.563	7.202	6.06267	0.853897
552	7.1	8.057	2.93	6.104	5.697	0.802394
553	7.1	8.911	2.441	5.981	5.77767	0.813756
554	7.1	7.813	2.808	5.981	5.534	0.779437
555	7.1	8.301	2.441	6.104	5.61533	0.790892
556	7.1	8.423	3.296	6.104	5.941	0.836761
557	7.1	8.179	2.686	6.47	5.77833	0.81385
558	7.1	7.69	2.563	6.592	5.615	0.790845
559	7.2	7.69	2.563	6.348	5.53367	0.768565
560	7.2	8.179	2.808	5.859	5.61533	0.779907
561	7.2	8.545	3.54	6.47	6.185	0.859028
562	7.2	8.301	3.662	6.836	6.26633	0.870324
563	7.2	8.301	3.174	6.714	6.063	0.842083
564	7.2	7.446	2.93	6.104	5.49333	0.762963
565	7.2	7.568	2.808	6.47	5.61533	0.779907
566	7.2	7.813	3.662	6.104	5.85967	0.813843
567	7.3	7.324	3.906	6.226	5.81867	0.797078
568	7.3	7.813	3.052	6.47	5.77833	0.791553
569	7.3	8.057	2.93	6.47	5.819	0.797123
570	7.3	7.568	3.174	6.836	5.85933	0.802648
571	7.3	8.057	2.563	6.592	5.73733	0.785936
572	7.3	8.179	3.052	6.104	5.77833	0.791553
573	7.3	8.667	3.296	6.47	6.14433	0.841689
574	7.3	8.179	4.15	5.981	6.10333	0.836073
575	7.4	7.69	2.686	6.348	5.57467	0.753333
576	7.4	8.179	3.174	6.714	6.02233	0.813829
577	7.4	7.935	3.662	6.592	6.063	0.819324
578	7.4	7.813	3.418	7.324	6.185	0.835811
579	7.4	7.813	3.784	6.348	5.98167	0.808333
580	7.4	7.813	3.906	6.226	5.98167	0.808333
581	7.4	7.935	4.15	6.592	6.22567	0.841306
582	7.4	8.423	3.296	7.568	6.429	0.868784
583	7.5	7.69	4.028	6.836	6.18467	0.824622
584	7.5	8.301	3.174	6.348	5.941	0.792133
585	7.5	7.69	3.418	6.47	5.85933	0.781244
586	7.5	7.69	3.54	6.958	6.06267	0.808356
587	7.5	8.179	4.272	6.226	6.22567	0.830089
588	7.5	7.935	3.662	6.958	6.185	0.824667
589	7.5	8.057	3.906	6.958	6.307	0.840933
590	7.6	8.545	4.028	6.592	6.38833	0.84057
591	7.6	7.813	4.395	6.714	6.30733	0.829912
592	7.6	8.301	3.906	7.202	6.46967	0.851272
593	7.6	8.667	4.028	7.08	6.59167	0.867325
594	7.6	8.057	4.15	6.104	6.10367	0.803114
595	7.6	8.179	3.784	7.08	6.34767	0.835219
596	7.6	8.423	3.174	6.714	6.10367	0.803114
597	7.6	8.179	3.662	6.592	6.14433	0.808465
598	7.7	8.057	4.395	6.592	6.348	0.824416
599	7.7	8.057	4.517	6.714	6.42933	0.834978
600	7.7	8.179	4.15	6.958	6.429	0.834935
601	7.7	8.667	3.906	7.202	6.59167	0.856061
602	7.7	8.301	4.028	7.935	6.75467	0.877229
603	7.7	7.568	3.418	7.446	6.144	0.797922
604	7.7	8.301	4.272	6.958	6.51033	0.845498
605	7.7	8.179	4.883	6.226	6.42933	0.834978
606	7.8	7.813	4.395	6.714	6.30733	0.808632
607	7.8	7.935	4.761	6.836	6.51067	0.834701
608	7.8	8.423	3.906	6.47	6.26633	0.803376
609	7.8	8.179	4.272	6.836	6.429	0.824231
610	7.8	7.813	3.662	6.592	6.02233	0.772094
611	7.8	8.667	4.517	7.202	6.79533	0.871197
612	7.8	8.057	4.028	6.958	6.34767	0.813803
613	7.8	9.033	4.15	6.714	6.63233	0.850299
614	7.9	8.179	4.028	7.446	6.551	0.829241
615	7.9	8.423	4.028	7.324	6.59167	0.834388
616	7.9	8.179	4.395	7.202	6.592	0.83443
617	7.9	8.301	4.761	7.446	6.836	0.865316
618	7.9	8.179	4.883	7.08	6.714	0.849873
619	7.9	7.568	5.127	7.08	6.59167	0.834388
620	7.9	7.324	4.395	7.324	6.34767	0.803502
621	7.9	7.813	4.883	7.324	6.67333	0.844726
622	8	8.301	3.906	6.592	6.26633	0.783292
623	8	8.057	4.517	7.08	6.55133	0.818917
624	8	8.423	5.127	6.958	6.836	0.8545
625	8	7.69	4.272	6.714	6.22533	0.778167
626	8	8.057	4.395	7.324	6.592	0.824
627	8	8.057	4.761	7.08	6.63267	0.829083
628	8	7.568	4.272	7.202	6.34733	0.793417
629	8.1	7.08	4.639	5.493	5.73733	0.708313
630	8.1	8.179	4.272	6.958	6.46967	0.798724
631	8.1	7.935	5.127	6.836	6.63267	0.818848
632	8.1	6.592	4.028	6.958	5.85933	0.723374
633	8.1	7.446	4.395	6.714	6.185	0.76358
634	8.1	7.446	4.761	7.202	6.46967	0.798724
635	8.1	7.813	4.028	6.47	6.10367	0.753539
636	8.1	8.423	4.395	6.47	6.42933	0.793745
637	8.2	7.324	4.272	6.348	5.98133	0.729431
638	8.2	7.568	5.371	6.714	6.551	0.798902
639	8.2	7.446	4.395	7.324	6.38833	0.779065
640	8.2	7.813	4.028	6.714	6.185	0.754268
641	8.2	8.057	4.761	6.592	6.47	0.789024
642	8.2	8.301	5.005	6.836	6.714	0.81878
643	8.2	7.813	5.615	7.568	6.99867	0.853496
644	8.2	7.568	4.517	6.958	6.34767	0.774106
645	8.3	8.057	5.493	6.836	6.79533	0.818715
646	8.3	7.813	4.883	7.08	6.592	0.794217
647	8.3	8.301	4.761	6.226	6.42933	0.774618
648	8.3	7.69	4.883	6.226	6.26633	0.75498
649	8.3	7.935	5.249	7.08	6.75467	0.813815
650	8.3	8.057	4.517	6.958	6.51067	0.784418
651	8.3	7.446	4.15	6.348	5.98133	0.720643
652	8.3	8.179	5.249	6.714	6.714	0.808916
653	8.4	8.057	4.272	6.592	6.307	0.750833
654	8.4	9.033	4.517	6.958	6.836	0.81381
655	8.4	8.301	4.028	6.47	6.26633	0.745992
656	8.4	8.179	5.005	7.446	6.87667	0.818651
657	8.4	7.202	4.639	7.202	6.34767	0.755675
658	8.4	7.446	3.906	6.592	5.98133	0.712063
659	8.4	7.568	4.761	7.202	6.51033	0.77504
660	8.4	8.301	4.639	7.08	6.67333	0.794444
661	8.5	8.423	4.639	6.958	6.67333	0.785098
662	8.5	7.813	4.761	7.202	6.592	0.775529
663	8.5	8.057	4.395	7.568	6.67333	0.785098
664	8.5	7.202	5.249	6.592	6.34767	0.746784
665	8.5	8.057	4.517	7.69	6.75467	0.794667
666	8.5	7.568	4.883	6.592	6.34767	0.746784
667	8.5	8.423	4.883	6.348	6.55133	0.770745
668	8.6	8.057	4.517	6.226	6.26667	0.728682
669	8.6	7.568	5.005	6.958	6.51033	0.757016
670	8.6	6.958	5.005	7.08	6.34767	0.738101
671	8.6	7.568	4.15	6.47	6.06267	0.704961
672	8.6	7.935	4.272	6.836	6.34767	0.738101
673	8.6	8.179	4.883	6.836	6.63267	0.77124
674	8.6	8.179	5.127	6.714	6.67333	0.775969
675	8.6	7.568	4.883	6.836	6.429	0.747558
676	8.7	8.301	4.761	6.592	6.55133	0.753027
677	8.7	8.057	5.859	6.958	6.958	0.79977
678	8.7	8.179	4.517	6.714	6.47	0.743678
679	8.7	8.301	5.005	7.446	6.91733	0.795096
680	8.7	8.301	3.906	7.202	6.46967	0.74364
681	8.7	7.446	5.127	7.08	6.551	0.752989
682	8.7	8.423	4.883	7.446	6.91733	0.795096
683	8.7	7.935	5.371	6.958	6.75467	0.776398
684	8.8	8.301	4.761	6.958	6.67333	0.758333
685	8.8	7.446	4.15	6.348	5.98133	0.679697
686	8.8	8.423	4.883	6.958	6.75467	0.767576
687	8.8	7.69	4.883	6.47	6.34767	0.721326
688	8.8	7.568	4.15	6.348	6.022	0.684318
689	8.8	7.813	4.517	6.47	6.26667	0.712121
690	8.8	7.568	5.005	6.592	6.38833	0.725947
691	8.8	8.179	4.395	7.08	6.55133	0.74447
692	8.9	8.545	4.517	6.592	6.55133	0.736105
693	8.9	8.057	5.005	6.348	6.47	0.726966
694	8.9	8.545	3.296	6.958	6.26633	0.704082
695	8.9	8.545	3.906	6.47	6.307	0.708652
696	8.9	8.301	4.272	6.47	6.34767	0.713221
697	8.9	7.568	5.005	6.47	6.34767	0.713221
698	8.9	7.935	4.395	7.324	6.55133	0.736105
699	8.9	8.179	4.395	6.592	6.38867	0.717828
700	9	8.301	4.517	6.958	6.592	0.732444
701	9	7.813	3.418	6.592	5.941	0.660111
702	9	7.935	4.15	6.958	6.34767	0.705296
703	9	7.568	4.272	6.348	6.06267	0.67363
704	9	9.033	4.517	6.47	6.67333	0.741481
705	9	7.935	4.028	6.348	6.10367	0.678185
706	9	7.935	4.395	6.592	6.30733	0.700815
707	9	7.08	5.005	6.47	6.185	0.687222
708	9.1	8.057	3.54	6.226	5.941	0.652857
709	9.1	7.568	4.639	6.348	6.185	0.67967
710	9.1	7.69	4.639	7.568	6.63233	0.728828
711	9.1	7.935	4.517	6.592	6.348	0.697582
712	9.1	8.057	4.15	6.714	6.307	0.693077
713	9.1	7.935	3.784	6.348	6.02233	0.661795
714	9.1	7.568	4.272	6.592	6.144	0.675165
715	9.2	8.179	4.272	6.47	6.307	0.685543
716	9.2	8.301	4.517	6.348	6.38867	0.69442
717	9.2	8.911	4.761	6.714	6.79533	0.738623
718	9.2	8.667	4.639	6.592	6.63267	0.720942
719	9.2	8.545	4.028	7.202	6.59167	0.716486
720	9.2	8.179	4.15	6.958	6.429	0.698804
721	9.2	7.935	4.395	7.69	6.67333	0.725362
722	9.2	8.057	4.395	6.958	6.47	0.703261
723	9.3	9.399	3.906	7.08	6.795	0.730645
724	9.3	8.789	3.784	6.714	6.429	0.69129
725	9.3	7.935	4.028	7.08	6.34767	0.682545
726	9.3	7.935	4.395	6.592	6.30733	0.678208
727	9.3	7.935	4.272	6.226	6.14433	0.660681
728	9.3	8.301	4.395	6.714	6.47	0.695699
729	9.3	8.179	4.028	6.958	6.38833	0.686918
730	9.3	8.545	3.784	7.202	6.51033	0.700036
731	9.4	8.667	4.272	8.057	6.99867	0.744539
732	9.4	8.179	4.028	7.324	6.51033	0.692589
733	9.4	8.057	4.395	7.69	6.714	0.714255
734	9.4	6.714	3.662	7.08	5.81867	0.619007
735	9.4	8.423	4.272	6.958	6.551	0.696915
736	9.4	9.277	4.517	7.324	7.03933	0.748865
737	9.4	8.057	4.15	6.836	6.34767	0.675284
738	9.4	7.568	4.15	7.568	6.42867	0.683901
739	9.5	7.935	4.15	6.836	6.307	0.663895
740	9.5	8.789	4.883	6.47	6.714	0.706737
741	9.5	8.423	4.028	6.958	6.46967	0.681018
742	9.5	7.935	4.028	6.836	6.26633	0.659614
743	9.5	7.935	4.028	7.202	6.38833	0.672456
744	9.5	8.667	3.54	6.836	6.34767	0.668175
745	9.5	8.179	3.54	7.324	6.34767	0.668175
746	9.5	7.568	4.272	6.348	6.06267	0.638175
747	9.6	7.813	4.272	6.836	6.307	0.656979
748	9.6	8.179	4.15	7.324	6.551	0.682396
749	9.6	8.545	4.272	7.202	6.673	0.695104
750	9.6	7.324	3.784	6.592	5.9	0.614583
751	9.6	7.568	3.662	6.592	5.94067	0.618819
752	9.6	8.057	3.662	7.08	6.26633	0.652743
753	9.6	7.935	4.15	7.935	6.67333	0.695139
754	9.7	7.813	4.028	7.324	6.38833	0.658591
755	9.7	8.179	4.028	6.714	6.307	0.650206
756	9.7	8.057	3.54	6.836	6.14433	0.633436
757	9.7	8.179	3.54	6.714	6.14433	0.633436
758	9.7	7.813	3.54	7.69	6.34767	0.654399
759	9.7	7.202	4.028	7.446	6.22533	0.641787
760	9.7	8.545	3.54	7.324	6.46967	0.666976
761	9.7	9.399	3.662	8.057	7.03933	0.725704
762	9.8	9.399	3.174	7.568	6.71367	0.685068
763	9.8	7.568	2.441	7.935	5.98133	0.61034
764	9.8	7.568	3.296	6.958	5.94067	0.60619
765	9.8	8.179	3.296	7.08	6.185	0.631122
766	9.8	8.545	3.174	6.714	6.14433	0.626973
767	9.8	8.423	3.662	7.08	6.38833	0.651871
768	9.8	7.813	3.174	7.935	6.30733	0.643605
769	9.8	8.667	3.418	7.446	6.51033	0.66432
770	9.9	8.057	3.174	7.69	6.307	0.637071
771	9.9	8.057	2.808	7.568	6.14433	0.62064
772	9.9	7.568	4.028	8.057	6.551	0.661717
773	9.9	8.667	3.662	7.446	6.59167	0.665825
774	9.9	8.423	4.028	7.69	6.71367	0.678148
775	9.9	8.545	2.563	7.446	6.18467	0.624714
776	9.9	7.202	3.174	6.958	5.778	0.583636
777	9.9	7.813	3.296	7.446	6.185	0.624747
778	10	8.301	3.784	8.057	6.714	0.6714
779	10	9.277	3.662	7.324	6.75433	0.675433
780	10	8.423	3.662	7.568	6.551	0.6551
781	10	8.301	3.784	7.202	6.429	0.6429
782	10	9.155	3.54	7.202	6.63233	0.663233
783	10	8.423	3.54	7.446	6.46967	0.646967
784	10	7.69	3.174	6.958	5.94067	0.594067
785	10	7.935	3.54	6.592	6.02233	0.602233
786	10.1	8.179	4.028	7.813	6.67333	0.660726
787	10.1	8.301	3.54	6.836	6.22567	0.616403
788	10.1	7.813	2.808	7.935	6.18533	0.612409
789	10.1	7.813	3.784	7.446	6.34767	0.628482
790	10.1	7.935	4.15	7.568	6.551	0.648614
791	10.1	8.179	4.15	7.08	6.46967	0.640561
792	10.1	7.69	4.028	7.324	6.34733	0.628449
793	10.2	9.033	3.784	7.935	6.91733	0.67817
794	10.2	8.423	3.174	7.568	6.38833	0.626307
795	10.2	7.69	2.197	7.08	5.65567	0.554477
796	10.2	7.446	4.028	7.324	6.266	0.614314
797	10.2	7.446	3.54	7.202	6.06267	0.594379
798	10.2	7.813	3.54	7.446	6.26633	0.614346
799	10.2	8.789	4.272	8.301	7.12067	0.698105
800	10.2	8.667	3.296	6.714	6.22567	0.610359
801	10.3	8.545	4.028	7.813	6.79533	0.659741
802	10.3	7.935	3.296	6.714	5.98167	0.580744
803	10.3	8.057	4.272	6.836	6.38833	0.620227
804	10.3	8.667	4.272	7.08	6.673	0.647864
805	10.3	8.423	4.517	7.568	6.836	0.663689
806	10.3	8.667	4.395	7.935	6.999	0.679515
807	10.3	8.667	4.395	6.836	6.63267	0.643948
808	10.3	9.033	3.662	7.568	6.75433	0.655761
809	10.4	8.057	4.028	7.324	6.46967	0.622083
810	10.4	8.179	4.517	6.836	6.51067	0.626026
811	10.4	8.545	4.639	7.202	6.79533	0.653397
812	10.4	9.277	4.15	7.568	6.99833	0.672917
813	10.4	9.155	3.54	7.813	6.836	0.657308
814	10.4	8.911	3.662	7.446	6.673	0.641635
815	10.4	8.545	3.296	7.08	6.307	0.606442
816	10.4	8.789	3.906	6.958	6.551	0.629904
817	10.5	7.69	4.517	7.324	6.51033	0.620032
818	10.5	8.423	3.54	7.568	6.51033	0.620032
819	10.5	9.155	4.272	7.568	6.99833	0.666508
820	10.5	8.545	4.272	7.446	6.75433	0.64327
821	10.5	8.667	3.784	7.813	6.75467	0.643302
822	10.5	9.277	4.639	7.446	7.12067	0.678159
823	10.5	8.179	4.272	7.568	6.673	0.635524
824	10.5	8.667	4.028	8.057	6.91733	0.658794
825	10.6	8.301	4.15	8.057	6.836	0.644906
826	10.6	8.179	4.15	7.324	6.551	0.618019
827	10.6	8.179	4.395	7.813	6.79567	0.641101
828	10.6	8.179	3.54	8.057	6.592	0.621887
829	10.6	8.423	4.395	7.568	6.79533	0.641069
830	10.6	8.423	4.15	7.69	6.75433	0.637201
831	10.6	8.545	3.906	8.179	6.87667	0.648742
832	10.6	8.667	4.272	8.301	7.08	0.667925
833	10.7	9.155	3.784	8.057	6.99867	0.654081
834	10.7	8.179	3.052	7.324	6.185	0.578037
835	10.7	8.423	4.15	7.69	6.75433	0.631246
836	10.7	7.935	4.395	8.301	6.877	0.64271
837	10.7	8.057	4.028	7.69	6.59167	0.616044
838	10.7	8.301	4.517	8.423	7.08033	0.661713
839	10.7	8.179	4.15	7.935	6.75467	0.631277
840	10.8	8.057	4.272	7.324	6.551	0.606574
841	10.8	8.911	5.371	7.446	7.24267	0.670617
842	10.8	8.667	5.127	8.545	7.44633	0.689475
843	10.8	8.301	4.639	8.179	7.03967	0.651821
844	10.8	8.789	4.761	8.301	7.28367	0.674414
845	10.8	8.545	4.761	8.057	7.121	0.659352
846	10.8	8.423	4.272	8.057	6.91733	0.640494
847	10.8	8.423	5.005	7.813	7.08033	0.655586
848	10.9	8.911	5.371	7.202	7.16133	0.657003
849	10.9	8.545	4.761	8.301	7.20233	0.660765
850	10.9	9.155	4.761	7.202	7.03933	0.64581
851	10.9	8.667	4.883	8.057	7.20233	0.660765
852	10.9	9.399	5.127	7.813	7.44633	0.68315
853	10.9	9.277	4.15	7.446	6.95767	0.638318
854	10.9	9.521	4.517	7.813	7.28367	0.668226
855	10.9	8.789	4.517	7.813	7.03967	0.645841
856	11	8.911	3.906	8.179	6.99867	0.636242
857	11	8.789	4.395	8.179	7.121	0.647364
858	11	8.911	4.028	8.057	6.99867	0.636242
859	11	9.033	5.127	7.324	7.16133	0.65103
860	11	8.789	5.127	8.179	7.365	0.669545
861	11	9.033	4.639	8.179	7.28367	0.662152
862	11	9.155	4.395	8.789	7.44633	0.676939
863	11	8.423	4.15	8.179	6.91733	0.628848
864	11.1	8.301	4.517	7.568	6.79533	0.612192
865	11.1	8.789	4.639	7.324	6.91733	0.623183
866	11.1	9.155	4.517	7.202	6.958	0.626847
867	11.1	8.911	4.517	7.324	6.91733	0.623183
868	11.1	8.789	4.272	7.568	6.87633	0.619489
869	11.1	8.301	4.517	7.935	6.91767	0.623213
870	11.1	8.789	4.15	8.057	6.99867	0.630511
871	11.1	8.789	4.761	7.324	6.958	0.626847
872	11.2	8.545	5.127	7.69	7.12067	0.635774
873	11.2	8.667	4.272	6.47	6.46967	0.577649
874	11.2	8.301	4.517	7.08	6.63267	0.592202
875	11.2	8.667	4.395	7.324	6.79533	0.606726
876	11.2	9.155	4.883	7.813	7.28367	0.650327
877	11.2	8.789	4.395	8.545	7.243	0.646696
878	11.2	8.423	4.028	7.08	6.51033	0.58128
879	11.3	8.423	4.761	7.202	6.79533	0.601357
880	11.3	8.667	4.272	8.057	6.99867	0.619351
881	11.3	8.789	5.127	8.301	7.40567	0.655369
882	11.3	8.911	5.127	8.179	7.40567	0.655369
883	11.3	8.911	4.517	7.446	6.958	0.615752
884	11.3	9.033	4.517	8.057	7.20233	0.637375
885	11.3	9.277	5.249	7.568	7.36467	0.65174
886	11.3	9.277	4.639	7.568	7.16133	0.633746
887	11.4	8.179	4.639	7.324	6.714	0.588947
888	11.4	8.545	4.761	6.958	6.75467	0.592515
889	11.4	8.667	5.371	7.202	7.08	0.621053
890	11.4	8.911	4.517	7.08	6.836	0.599649
891	11.4	8.789	4.517	6.958	6.75467	0.592515
892	11.4	9.033	4.883	7.69	7.202	0.631754
893	11.4	8.545	5.249	7.568	7.12067	0.62462
894	11.4	8.789	4.517	7.568	6.958	0.610351
895	11.5	8.301	4.395	7.568	6.75467	0.587362
896	11.5	8.423	4.15	6.958	6.51033	0.566116
897	11.5	8.179	4.883	7.568	6.87667	0.597971
898	11.5	8.423	4.395	7.568	6.79533	0.590899
899	11.5	7.813	5.005	8.057	6.95833	0.605072
900	11.5	8.423	4.15	7.446	6.673	0.580261
901	11.5	8.179	4.639	7.568	6.79533	0.590899
902	11.5	9.399	4.883	8.179	7.487	0.651043
903	11.6	8.667	4.761	7.568	6.99867	0.603333
904	11.6	8.545	4.272	8.057	6.958	0.599828
905	11.6	8.057	5.615	8.301	7.32433	0.631408
906	11.6	8.423	5.371	8.179	7.32433	0.631408
907	11.6	8.179	4.883	8.789	7.28367	0.627902
908	11.6	8.301	4.395	7.446	6.714	0.578793
909	11.6	7.813	5.615	7.324	6.91733	0.596322
910	11.6	8.057	5.615	7.202	6.958	0.599828
911	11.7	8.423	6.104	7.568	7.365	0.629487
912	11.7	8.301	5.127	8.179	7.20233	0.615584
913	11.7	8.179	5.127	7.935	7.08033	0.605157
914	11.7	8.545	5.249	7.324	7.03933	0.601652
915	11.7	8.789	4.761	7.935	7.16167	0.612108
916	11.7	8.179	5.615	7.568	7.12067	0.608604
917	11.7	7.69	4.883	7.935	6.836	0.584274
918	11.8	7.935	5.737	7.446	7.03933	0.596554
919	11.8	8.179	5.249	7.69	7.03933	0.596554
920	11.8	8.423	5.005	7.813	7.08033	0.600028
921	11.8	8.545	5.005	7.813	7.121	0.603475
922	11.8	8.911	5.005	8.057	7.32433	0.620706
923	11.8	8.545	4.517	8.179	7.08033	0.600028
924	11.8	8.179	4.15	7.568	6.63233	0.562062
925	11.8	8.667	5.005	7.69	7.12067	0.603446
926	11.9	7.813	5.127	7.446	6.79533	0.571036
927	11.9	9.277	5.493	7.202	7.324	0.615462
928	11.9	8.789	4.395	7.202	6.79533	0.571036
929	11.9	8.423	4.517	6.958	6.63267	0.557367
930	11.9	7.935	4.639	7.324	6.63267	0.557367
931	11.9	8.545	4.761	8.301	7.20233	0.605238
932	11.9	7.568	4.517	7.202	6.429	0.540252
933	11.9	8.179	5.005	7.813	6.999	0.588151
934	12	8.423	5.005	7.324	6.91733	0.576444
935	12	8.667	3.906	7.08	6.551	0.545917
936	12	8.423	4.883	7.324	6.87667	0.573056
937	12	8.301	3.662	7.446	6.46967	0.539139
938	12	7.568	4.395	7.813	6.592	0.549333
939	12	8.423	4.272	7.568	6.75433	0.562861
940	12	8.301	3.906	7.568	6.59167	0.549306
941	12	8.545	4.272	7.813	6.87667	0.573056
942	12.1	8.423	4.15	8.057	6.87667	0.56832
943	12.1	8.667	4.883	7.813	7.121	0.588512
944	12.1	8.179	3.906	7.813	6.63267	0.548154
945	12.1	9.155	5.005	7.813	7.32433	0.605317
946	12.1	8.423	3.662	7.324	6.46967	0.534683
947	12.1	8.545	5.005	7.813	7.121	0.588512
948	12.1	8.301	3.906	7.813	6.67333	0.551515
949	12.1	7.69	3.662	7.813	6.38833	0.527961
950	12.2	7.568	4.761	7.935	6.75467	0.553661
951	12.2	7.935	4.517	8.301	6.91767	0.567022
952	12.2	7.446	4.028	8.179	6.551	0.536967
953	12.2	8.667	4.395	8.179	7.08033	0.580355
954	12.2	8.423	4.517	7.69	6.87667	0.563661
955	12.2	7.568	4.395	7.08	6.34767	0.520301
956	12.2	7.935	4.761	7.568	6.75467	0.553661
957	12.2	7.202	4.883	8.301	6.79533	0.556995
958	12.3	7.446	4.517	7.813	6.592	0.535935
959	12.3	8.179	4.639	7.568	6.79533	0.552466
960	12.3	8.301	4.272	7.813	6.79533	0.552466
961	12.3	7.813	3.906	8.179	6.63267	0.539241
962	12.3	7.813	4.028	8.423	6.75467	0.54916
963	12.3	7.935	4.883	7.568	6.79533	0.552466
964	12.3	8.057	4.883	7.813	6.91767	0.562412
965	12.4	7.935	4.761	8.545	7.08033	0.570995
966	12.4	8.301	3.662	8.057	6.67333	0.538172
967	12.4	8.423	5.249	8.789	7.487	0.60379
968	12.4	7.813	4.639	8.789	7.08033	0.570995
969	12.4	7.813	4.639	8.057	6.83633	0.551317
970	12.4	7.446	4.517	8.667	6.87667	0.55457
971	12.4	7.568	5.127	8.545	7.08	0.570968
972	12.4	8.179	4.761	9.155	7.365	0.593952
973	12.5	8.057	5.127	8.301	7.16167	0.572933
974	12.5	8.423	4.395	8.057	6.95833	0.556667
975	12.5	8.545	4.395	8.179	7.03967	0.563173
976	12.5	8.789	5.005	8.911	7.56833	0.605467
977	12.5	8.301	4.883	8.545	7.243	0.57944
978	12.5	8.301	4.883	8.911	7.365	0.5892
979	12.5	9.033	4.761	9.277	7.69033	0.615227
980	12.5	9.033	4.15	8.301	7.16133	0.572907
981	12.6	8.057	5.005	8.423	7.16167	0.568386
982	12.6	8.423	4.272	8.423	7.03933	0.558677
983	12.6	8.057	4.395	7.935	6.79567	0.539339
984	12.6	8.057	4.517	8.179	6.91767	0.549021
985	12.6	8.667	4.761	8.911	7.44633	0.590979
986	12.6	8.545	4.517	8.545	7.20233	0.571614
987	12.6	8.911	4.761	8.545	7.40567	0.587751
988	12.6	8.301	4.395	8.667	7.121	0.565159
989	12.7	8.301	4.395	8.545	7.08033	0.557507
990	12.7	8.423	4.761	9.277	7.487	0.589528
991	12.7	9.155	3.906	9.155	7.40533	0.583097
992	12.7	9.155	5.127	9.277	7.853	0.618346
993	12.7	8.545	3.418	8.911	6.958	0.547874
994	12.7	8.911	4.272	9.155	7.446	0.586299
995	12.7	8.789	4.028	8.789	7.202	0.567087
996	12.7	8.423	4.517	8.667	7.20233	0.567113
997	12.8	8.545	3.662	8.911	7.03933	0.549948
998	12.8	9.033	4.15	9.644	7.609	0.594453
999	12.8	9.155	3.906	9.033	7.36467	0.575365
1000	12.8	8.179	3.418	9.155	6.91733	0.540417
1001	12.8	8.667	3.784	8.057	6.836	0.534062
1002	12.8	8.789	4.517	9.521	7.609	0.594453
1003	12.8	8.911	4.395	9.644	7.65	0.597656
1004	12.9	8.423	4.272	9.521	7.40533	0.574057
1005	12.9	9.521	3.662	9.033	7.40533	0.574057
1006	12.9	8.911	5.615	9.277	7.93433	0.615065
1007	12.9	8.911	4.883	9.521	7.77167	0.602455
1008	12.9	8.911	4.761	8.911	7.52767	0.58354
1009	12.9	8.301	4.761	9.033	7.365	0.57093
1010	12.9	8.911	4.883	9.155	7.64967	0.592997
1011	12.9	9.155	4.761	9.521	7.81233	0.605607
1012	13	9.033	5.127	9.644	7.93467	0.610359
1013	13	9.033	4.395	9.888	7.772	0.597846
1014	13	8.911	5.005	9.521	7.81233	0.600949
1015	13	9.155	4.395	9.277	7.609	0.585308
1016	13	8.789	5.371	8.911	7.69033	0.591564
1017	13	9.277	5.249	9.155	7.89367	0.607205
1018	13	9.521	4.761	9.033	7.77167	0.597821
1019	13	9.155	4.883	9.399	7.81233	0.600949
1020	13.1	9.521	4.395	9.399	7.77167	0.593257
1021	13.1	9.033	4.883	9.766	7.894	0.602595
1022	13.1	9.521	4.761	9.521	7.93433	0.605674
1023	13.1	10.498	4.15	9.888	8.17867	0.624326
1024	13.1	9.155	4.272	9.766	7.731	0.590153
1025	13.1	9.277	4.272	9.399	7.64933	0.583919
1026	13.1	9.033	4.761	9.399	7.731	0.590153
1027	13.1	9.888	4.639	9.644	8.057	0.615038
1028	13.2	9.888	4.517	10.376	8.26033	0.625783
1029	13.2	10.254	4.517	10.62	8.46367	0.641187
1030	13.2	9.766	3.296	10.742	7.93467	0.601111
1031	13.2	10.132	3.54	10.986	8.21933	0.622677
1032	13.2	9.644	4.395	11.108	8.38233	0.635025
1033	13.2	9.888	4.883	10.62	8.46367	0.641187
1034	13.2	9.399	3.906	10.742	8.01567	0.607247
1035	13.2	9.521	4.272	10.742	8.17833	0.619571
1036	13.3	9.644	4.028	11.963	8.545	0.642481
1037	13.3	9.888	4.028	11.23	8.382	0.630226
1038	13.3	8.911	4.028	10.62	7.853	0.590451
1039	13.3	9.155	4.395	10.62	8.05667	0.605764
1040	13.3	9.277	4.639	10.864	8.26	0.621053
1041	13.3	9.155	4.272	11.23	8.219	0.61797
1042	13.3	9.521	4.272	10.986	8.25967	0.621028
1043	13.4	9.644	4.028	10.986	8.21933	0.613383
1044	13.4	9.277	4.15	10.864	8.097	0.604254
1045	13.4	9.644	4.15	10.742	8.17867	0.610348
1046	13.4	9.888	5.005	10.742	8.545	0.637687
1047	13.4	9.033	5.005	10.864	8.30067	0.619453
1048	13.4	10.01	4.517	11.23	8.58567	0.640721
1049	13.4	9.277	4.761	10.986	8.34133	0.622488
1050	13.4	9.888	5.005	10.986	8.62633	0.643756
1051	13.5	10.498	4.639	10.742	8.62633	0.638988
1052	13.5	9.644	5.371	10.498	8.50433	0.629951
1053	13.5	9.644	4.883	10.742	8.423	0.623926
1054	13.5	9.888	5.249	10.254	8.46367	0.626938
1055	13.5	9.766	3.906	10.132	7.93467	0.587753
1056	13.5	9.277	4.761	10.376	8.138	0.602815
1057	13.5	10.01	4.028	10.254	8.09733	0.599802
1058	13.5	9.888	5.371	10.254	8.50433	0.629951
1059	13.6	9.766	5.005	10.498	8.423	0.619338
1060	13.6	9.766	4.761	10.986	8.50433	0.625319
1061	13.6	9.888	4.639	10.62	8.38233	0.616348
1062	13.6	9.399	4.15	10.62	8.05633	0.592377
1063	13.6	9.521	4.761	9.521	7.93433	0.583407
1064	13.6	9.888	5.127	10.376	8.46367	0.622328
1065	13.6	8.545	5.249	10.01	7.93467	0.583431
1066	13.6	9.521	4.761	10.498	8.26	0.607353
1067	13.7	9.521	5.127	10.62	8.42267	0.614793
1068	13.7	10.01	3.906	10.254	8.05667	0.588078
1069	13.7	9.888	4.15	10.62	8.21933	0.599951
1070	13.7	10.376	4.395	10.254	8.34167	0.608881
1071	13.7	9.888	5.005	10.376	8.423	0.614818
1072	13.7	10.132	4.761	10.01	8.301	0.605912
1073	13.7	9.521	4.883	11.475	8.62633	0.629659
1074	13.7	10.254	3.54	11.23	8.34133	0.608856
1075	13.8	9.766	4.272	10.742	8.26	0.598551
1076	13.8	10.376	3.906	10.864	8.382	0.607391
1077	13.8	10.254	4.272	10.62	8.382	0.607391
1078	13.8	9.888	4.517	10.864	8.423	0.610362
1079	13.8	10.132	4.639	10.986	8.58567	0.62215
1080	13.8	9.399	4.15	10.986	8.17833	0.592633
1081	13.8	10.132	3.784	11.719	8.545	0.619203
1082	13.8	9.766	3.662	11.108	8.17867	0.592657
1083	13.9	9.644	3.662	10.864	8.05667	0.579616
1084	13.9	9.888	4.028	11.108	8.34133	0.600096
1085	13.9	9.766	4.272	11.108	8.382	0.603022
1086	13.9	9.888	4.395	10.742	8.34167	0.60012
1087	13.9	10.376	4.883	10.986	8.74833	0.629376
1088	13.9	10.62	3.906	11.23	8.58533	0.61765
1089	13.9	10.742	4.517	11.353	8.87067	0.638177
1090	14	10.498	3.784	10.864	8.382	0.598714
1091	14	10.864	4.395	11.475	8.91133	0.636524
1092	14	10.376	4.272	11.475	8.70767	0.621976
1093	14	10.742	4.028	11.963	8.911	0.6365
1094	14	9.766	3.662	10.376	7.93467	0.566762
1095	14	9.766	3.662	10.62	8.016	0.572571
1096	14	10.498	3.784	10.254	8.17867	0.58419
1097	14	9.888	3.906	11.23	8.34133	0.59581
1098	14.1	9.888	4.517	11.719	8.708	0.617589
1099	14.1	11.108	3.54	10.742	8.46333	0.600236
1100	14.1	10.254	3.784	10.376	8.138	0.577163
1101	14.1	10.498	4.028	10.498	8.34133	0.591584
1102	14.1	9.766	3.662	10.01	7.81267	0.55409
1103	14.1	10.376	4.761	10.132	8.423	0.597376
1104	14.1	10.132	4.028	10.498	8.21933	0.582931
1105	14.1	10.132	4.517	10.498	8.38233	0.594492
1106	14.2	9.766	4.395	10.986	8.38233	0.590305
1107	14.2	10.132	4.272	10.376	8.26	0.58169
1108	14.2	10.01	4.272	10.254	8.17867	0.575962
1109	14.2	10.864	4.15	10.376	8.46333	0.596009
1110	14.2	10.62	4.639	10.62	8.62633	0.607488
1111	14.2	10.132	4.517	10.498	8.38233	0.590305
1112	14.2	10.742	4.272	10.864	8.626	0.607465
1113	14.2	10.254	3.906	10.498	8.21933	0.578826
1114	14.3	10.498	4.517	10.254	8.423	0.589021
1115	14.3	10.376	4.395	10.376	8.38233	0.586177
1116	14.3	10.01	4.517	9.766	8.09767	0.56627
1117	14.3	9.521	4.883	10.254	8.21933	0.574779
1118	14.3	9.521	4.517	10.01	8.016	0.560559
1119	14.3	10.376	5.371	10.986	8.911	0.623147
1120	14.3	10.498	4.883	10.254	8.545	0.597552
1121	14.3	10.62	5.249	10.132	8.667	0.606084
1122	14.4	10.62	4.272	10.132	8.34133	0.579259
1123	14.4	10.132	4.761	10.132	8.34167	0.579282
1124	14.4	9.399	4.639	10.132	8.05667	0.559491
1125	14.4	10.376	4.883	10.498	8.58567	0.596227
1126	14.4	10.62	4.272	10.01	8.30067	0.576435
1127	14.4	10.62	5.249	10.01	8.62633	0.599051
1128	14.4	10.498	4.272	10.132	8.30067	0.576435
1129	14.5	10.742	4.883	10.254	8.62633	0.59492
1130	14.5	10.62	5.005	9.644	8.423	0.580897
1131	14.5	10.376	4.517	10.132	8.34167	0.575287
1132	14.5	9.766	4.639	10.62	8.34167	0.575287
1133	14.5	10.498	4.639	10.01	8.38233	0.578092
1134	14.5	10.498	3.906	10.01	8.138	0.561241
1135	14.5	9.888	4.028	10.01	7.97533	0.550023
1136	14.5	9.521	4.028	10.132	7.89367	0.544391
1137	14.6	9.766	4.15	10.01	7.97533	0.546256
1138	14.6	9.888	3.906	9.888	7.894	0.540685
1139	14.6	10.376	4.761	10.376	8.50433	0.582489
1140	14.6	10.01	4.028	9.888	7.97533	0.546256
1141	14.6	10.132	4.639	10.01	8.26033	0.565776
1142	14.6	9.277	4.272	9.766	7.77167	0.532306
1143	14.6	9.399	4.15	10.132	7.89367	0.540662
1144	14.6	9.033	3.784	10.254	7.69033	0.526735
1145	14.7	9.399	4.272	9.644	7.77167	0.528685
1146	14.7	9.277	3.906	9.888	7.69033	0.523152
1147	14.7	9.644	4.272	9.888	7.93467	0.539773
1148	14.7	9.766	4.15	9.766	7.894	0.537007
1149	14.7	9.399	4.639	10.132	8.05667	0.548073
1150	14.7	9.155	4.15	9.521	7.60867	0.517596
1151	14.7	9.521	4.15	9.644	7.77167	0.528685
1152	14.7	10.132	4.639	9.644	8.13833	0.553628
1153	14.8	10.864	4.395	9.888	8.38233	0.566374
1154	14.8	9.399	4.272	9.644	7.77167	0.525113
1155	14.8	9.521	3.906	9.155	7.52733	0.508604
1156	14.8	8.911	3.906	9.521	7.446	0.503108
1157	14.8	9.644	4.272	9.888	7.93467	0.536126
1158	14.8	9.888	4.028	9.888	7.93467	0.536126
1159	14.8	9.766	4.028	10.254	8.016	0.541622
1160	14.8	9.766	3.906	9.766	7.81267	0.527883
1161	14.9	9.766	4.15	10.01	7.97533	0.535257
1162	14.9	9.277	4.639	9.155	7.69033	0.51613
1163	14.9	10.01	4.028	9.399	7.81233	0.524318
1164	14.9	9.644	4.028	10.01	7.894	0.529799
1165	14.9	10.376	4.517	9.521	8.138	0.546174
1166	14.9	9.888	4.395	10.01	8.09767	0.543468
1167	14.9	10.376	4.517	10.498	8.46367	0.568031
1168	15	9.644	4.395	10.01	8.01633	0.534422
1169	15	10.01	4.395	9.521	7.97533	0.531689
1170	15	10.132	4.15	9.644	7.97533	0.531689
1171	15	10.254	4.272	9.888	8.138	0.542533
1172	15	10.376	4.639	10.864	8.62633	0.575089
1173	15	10.498	4.517	10.132	8.38233	0.558822
1174	15	10.132	3.662	9.766	7.85333	0.523556
1175	15	9.766	4.517	9.521	7.93467	0.528978
1176	15.1	10.254	5.005	10.62	8.62633	0.57128
1177	15.1	9.888	4.272	10.132	8.09733	0.536247
1178	15.1	10.01	4.395	10.62	8.34167	0.552428
1179	15.1	10.254	4.639	10.01	8.301	0.549735
1180	15.1	9.888	4.395	9.888	8.057	0.533576
1181	15.1	9.399	3.906	10.864	8.05633	0.533532
1182	15.1	10.01	4.15	10.254	8.138	0.53894
1183	15.1	9.888	4.517	10.254	8.21967	0.544349
1184	15.2	9.888	4.639	9.888	8.13833	0.535417
1185	15.2	9.644	5.249	9.888	8.26033	0.543443
1186	15.2	9.766	4.883	9.766	8.13833	0.535417
1187	15.2	9.277	4.761	10.132	8.05667	0.530044
1188	15.2	9.888	4.028	10.132	8.016	0.527368
1189	15.2	10.01	4.272	10.62	8.30067	0.546096
1190	15.2	9.644	4.15	10.132	7.97533	0.524693
1191	15.2	10.01	4.272	10.376	8.21933	0.540746
1192	15.3	9.155	4.15	10.742	8.01567	0.5239
1193	15.3	9.155	4.028	10.254	7.81233	0.51061
1194	15.3	9.399	4.761	10.01	8.05667	0.52658
1195	15.3	9.521	4.517	10.254	8.09733	0.529237
1196	15.3	9.766	4.517	10.132	8.13833	0.531917
1197	15.3	10.62	4.15	10.62	8.46333	0.553159
1198	15.3	10.62	4.395	10.254	8.423	0.550523
1199	15.3	9.644	4.395	10.62	8.21967	0.537233
1200	15.4	9.521	4.395	9.888	7.93467	0.515238
1201	15.4	9.399	4.517	10.376	8.09733	0.525801
1202	15.4	9.888	4.517	10.01	8.13833	0.528463
1203	15.4	9.277	4.883	10.498	8.21933	0.533723
1204	15.4	9.888	4.883	10.01	8.26033	0.536385
1205	15.4	9.277	4.395	9.888	7.85333	0.509957
1206	15.4	9.644	4.517	9.644	7.935	0.51526
1207	15.4	9.766	5.615	9.399	8.26	0.536364
1208	15.5	9.888	5.493	10.62	8.667	0.559161
1209	15.5	9.399	4.639	10.62	8.21933	0.53028
1210	15.5	9.766	4.883	10.498	8.38233	0.540796
1211	15.5	9.521	5.005	10.864	8.46333	0.546022
1212	15.5	9.155	4.883	10.498	8.17867	0.527656
1213	15.5	10.01	5.127	10.62	8.58567	0.553914
1214	15.5	10.01	5.127	10.498	8.545	0.55129
1215	15.6	10.376	5.249	10.864	8.82967	0.566004
1216	15.6	10.62	4.883	10.01	8.50433	0.54515
1217	15.6	9.644	4.639	10.498	8.26033	0.529509
1218	15.6	9.277	5.493	10.864	8.54467	0.547735
1219	15.6	9.644	5.249	10.132	8.34167	0.534722
1220	15.6	9.888	4.883	10.864	8.545	0.547756
1221	15.6	9.644	5.127	10.254	8.34167	0.534722
1222	15.6	10.01	4.883	10.864	8.58567	0.550363
1223	15.7	9.888	4.883	10.498	8.423	0.536497
1224	15.7	9.399	4.761	10.376	8.17867	0.520934
1225	15.7	10.254	4.395	9.644	8.09767	0.515775
1226	15.7	10.01	4.761	10.742	8.50433	0.541677
1227	15.7	9.888	5.615	10.62	8.70767	0.554628
1228	15.7	10.498	4.395	10.864	8.58567	0.546858
1229	15.7	10.376	4.517	10.742	8.545	0.544268
1230	15.7	9.644	4.15	10.742	8.17867	0.520934
1231	15.8	10.376	4.517	11.353	8.74867	0.553713
1232	15.8	9.521	4.517	11.108	8.382	0.530506
1233	15.8	9.644	5.127	11.963	8.91133	0.564008
1234	15.8	9.766	4.517	11.475	8.586	0.543418
1235	15.8	10.01	4.272	11.23	8.504	0.538228
1236	15.8	9.766	4.517	11.719	8.66733	0.548565
1237	15.8	9.399	4.883	11.23	8.504	0.538228
1238	15.8	9.644	5.005	11.108	8.58567	0.543397
1239	15.9	9.766	4.639	10.62	8.34167	0.524633
1240	15.9	9.399	5.371	10.498	8.42267	0.529727
1241	15.9	9.521	4.639	11.719	8.62633	0.542537
1242	15.9	10.01	3.906	11.719	8.545	0.537421
1243	15.9	9.399	3.906	10.864	8.05633	0.506688
1244	15.9	9.399	4.761	10.742	8.30067	0.522055
1245	15.9	8.789	5.493	11.353	8.545	0.537421
1246	15.9	9.766	4.517	10.986	8.423	0.529748
1247	16	9.277	5.127	11.23	8.54467	0.534042
1248	16	9.277	4.272	11.353	8.30067	0.518792
1249	16	8.911	4.761	10.864	8.17867	0.511167
1250	16	9.155	4.395	11.23	8.26	0.51625
1251	16	9.888	4.761	11.23	8.62633	0.539146
1252	16	10.62	5.127	11.719	9.15533	0.572208
1253	16	9.888	4.761	12.085	8.91133	0.556958
1254	16.1	10.01	5.005	10.864	8.62633	0.535797
1255	16.1	10.01	4.761	11.719	8.83	0.548447
1256	16.1	9.766	4.883	10.864	8.50433	0.528219
1257	16.1	9.521	5.249	10.986	8.58533	0.533251
1258	16.1	9.766	5.249	11.353	8.78933	0.545921
1259	16.1	9.888	4.517	11.475	8.62667	0.535818
1260	16.1	10.254	4.517	11.475	8.74867	0.543395
1261	16.1	10.132	4.15	11.719	8.667	0.538323
1262	16.2	10.376	4.761	12.329	9.15533	0.565144
1263	16.2	10.498	4.517	10.986	8.667	0.535
1264	16.2	10.498	4.761	10.498	8.58567	0.529979
1265	16.2	10.01	5.005	11.23	8.74833	0.540021
1266	16.2	10.742	4.639	11.475	8.952	0.552593
1267	16.2	10.62	4.761	10.62	8.667	0.535
1268	16.2	10.376	3.906	10.62	8.30067	0.512387
1269	16.2	9.888	5.005	10.62	8.50433	0.524959
1270	16.3	9.888	4.639	10.864	8.46367	0.519243
1271	16.3	10.498	4.517	11.841	8.952	0.549202
1272	16.3	10.254	4.517	12.085	8.952	0.549202
1273	16.3	10.01	4.395	11.841	8.74867	0.536728
1274	16.3	9.888	4.395	11.841	8.708	0.534233
1275	16.3	10.254	4.15	11.475	8.62633	0.529223
1276	16.3	10.376	5.005	11.475	8.952	0.549202
1277	16.3	9.888	4.761	11.475	8.708	0.534233
1278	16.4	9.399	4.761	11.597	8.58567	0.523516
1279	16.4	10.254	4.15	11.841	8.74833	0.533435
1280	16.4	10.254	3.906	11.475	8.545	0.521037
1281	16.4	10.01	3.906	10.986	8.30067	0.506138
1282	16.4	10.132	4.272	11.475	8.62633	0.525996
1283	16.4	10.01	4.272	11.597	8.62633	0.525996
1284	16.4	9.766	4.517	11.963	8.74867	0.533455
1285	16.4	9.399	4.272	11.108	8.25967	0.503638
1286	16.5	9.766	4.15	11.841	8.58567	0.520343
1287	16.5	9.521	5.127	10.864	8.504	0.515394
1288	16.5	10.132	4.639	10.864	8.545	0.517879
1289	16.5	9.277	4.883	10.864	8.34133	0.505535
1290	16.5	10.254	4.883	12.085	9.074	0.549939
1291	16.5	10.498	4.639	11.719	8.952	0.542545
1292	16.5	9.888	4.272	11.719	8.62633	0.522808
1293	16.6	10.132	5.127	11.841	9.03333	0.544177
1294	16.6	10.254	4.639	11.353	8.74867	0.527028
1295	16.6	10.254	5.859	11.719	9.27733	0.558876
1296	16.6	10.742	4.883	11.353	8.99267	0.541727
1297	16.6	9.888	5.249	11.108	8.74833	0.527008
1298	16.6	10.132	5.127	11.963	9.074	0.546627
1299	16.6	10.62	5.249	11.719	9.196	0.553976
1300	16.6	10.62	4.761	10.742	8.70767	0.524558
1301	16.7	10.01	5.859	10.742	8.87033	0.531158
1302	16.7	10.01	5.249	11.23	8.82967	0.528723
1303	16.7	10.01	5.371	11.597	8.99267	0.538483
1304	16.7	10.62	5.493	11.841	9.318	0.557964
1305	16.7	10.376	5.005	10.986	8.789	0.526287
1306	16.7	10.376	5.249	10.62	8.74833	0.523852
1307	16.7	10.742	5.493	10.62	8.95167	0.536028
1308	16.7	10.742	5.371	11.108	9.07367	0.543333
1309	16.8	11.23	5.249	11.23	9.23633	0.549782
1310	16.8	10.498	5.127	11.719	9.11467	0.54254
1311	16.8	9.766	5.005	12.329	9.03333	0.537698
1312	16.8	10.376	4.883	11.719	8.99267	0.535278
1313	16.8	10.742	5.127	11.475	9.11467	0.54254
1314	16.8	10.62	5.249	10.742	8.87033	0.527996
1315	16.8	10.132	5.127	10.986	8.74833	0.520734
1316	16.8	10.986	4.883	11.353	9.074	0.540119
1317	16.9	10.132	5.249	11.353	8.91133	0.527298
1318	16.9	10.498	5.615	11.108	9.07367	0.536903
1319	16.9	10.498	5.005	10.986	8.82967	0.522465
1320	16.9	10.864	5.127	11.475	9.15533	0.541736
1321	16.9	10.986	5.005	11.597	9.196	0.544142
1322	16.9	10.62	5.005	11.23	8.95167	0.529684
1323	16.9	10.864	5.005	11.108	8.99233	0.532091
1324	16.9	10.498	5.371	11.353	9.074	0.536923
1325	17	10.742	5.371	11.841	9.318	0.548118
1326	17	10.254	5.493	10.376	8.70767	0.512216
1327	17	10.62	5.371	10.742	8.911	0.524176
1328	17	10.254	5.371	11.353	8.99267	0.52898
1329	17	10.864	5.005	11.23	9.033	0.531353
1330	17	10.742	4.761	10.376	8.62633	0.507431
1331	17	10.498	5.493	10.742	8.911	0.524176
1332	17	10.742	5.493	10.986	9.07367	0.533745
1333	17.1	10.254	5.615	11.108	8.99233	0.525867
1334	17.1	10.254	5.493	10.62	8.789	0.513977
1335	17.1	10.742	5.127	10.986	8.95167	0.523489
1336	17.1	9.766	5.249	10.864	8.62633	0.504464
1337	17.1	10.498	5.005	10.132	8.545	0.499708
1338	17.1	10.376	6.348	10.498	9.074	0.530643
1339	17.1	10.986	5.737	10.01	8.911	0.521111
1340	17.2	10.132	5.249	10.742	8.70767	0.50626
1341	17.2	10.864	5.127	10.498	8.82967	0.513353
1342	17.2	10.01	4.883	10.864	8.58567	0.499167
1343	17.2	10.742	5.127	10.498	8.789	0.510988
1344	17.2	10.498	5.249	10.498	8.74833	0.508624
1345	17.2	10.742	6.348	10.01	9.03333	0.525194
1346	17.2	10.254	5.859	9.888	8.667	0.503895
1347	17.2	10.254	5.859	10.62	8.911	0.518081
1348	17.3	10.254	5.981	10.254	8.82967	0.510385
1349	17.3	11.475	4.883	10.01	8.78933	0.508054
1350	17.3	10.864	5.371	10.62	8.95167	0.517437
1351	17.3	11.108	5.493	10.01	8.87033	0.512736
1352	17.3	10.864	6.226	10.742	9.27733	0.536262
1353	17.3	10.498	5.371	10.62	8.82967	0.510385
1354	17.3	10.254	6.226	10.742	9.074	0.524509
1355	17.3	10.498	5.249	10.498	8.74833	0.505684
1356	17.4	10.498	5.127	10.132	8.58567	0.493429
1357	17.4	10.376	5.493	10.132	8.667	0.498103
1358	17.4	11.108	5.493	10.986	9.19567	0.528487
1359	17.4	11.108	5.493	10.01	8.87033	0.509789
1360	17.4	10.132	6.104	10.132	8.78933	0.505134
1361	17.4	10.498	5.615	10.132	8.74833	0.502778
1362	17.4	10.376	5.371	9.888	8.545	0.491092
1363	17.4	11.108	6.348	10.01	9.15533	0.526169
1364	17.5	10.62	5.859	10.254	8.911	0.5092
1365	17.5	10.376	6.348	9.888	8.87067	0.506895
1366	17.5	10.254	5.981	10.132	8.789	0.502229
1367	17.5	9.644	5.859	10.62	8.70767	0.497581
1368	17.5	10.01	6.592	10.742	9.11467	0.520838
1369	17.5	10.62	5.005	10.01	8.545	0.488286
1370	17.5	10.498	6.104	9.521	8.70767	0.497581
1371	17.5	9.521	5.859	9.888	8.42267	0.481295
1372	17.6	10.132	6.226	10.254	8.87067	0.504015
1373	17.6	10.01	5.859	10.132	8.667	0.492443
1374	17.6	9.399	5.981	8.789	8.05633	0.457746
1375	17.6	9.155	5.615	10.742	8.504	0.483182
1376	17.6	10.01	6.348	9.644	8.66733	0.492462
1377	17.6	9.888	5.981	9.888	8.58567	0.487822
1378	17.6	10.254	5.737	10.62	8.87033	0.503996
1379	17.7	10.132	5.615	10.132	8.62633	0.487363
1380	17.7	9.399	5.615	9.766	8.26	0.466667
1381	17.7	10.01	5.737	10.254	8.667	0.489661
1382	17.7	9.766	5.493	10.254	8.50433	0.480471
1383	17.7	9.521	5.981	9.155	8.219	0.46435
1384	17.7	9.766	5.859	9.521	8.382	0.473559
1385	17.7	10.01	6.226	9.888	8.708	0.491977
1386	17.7	9.033	5.981	10.132	8.382	0.473559
1387	17.8	9.766	5.981	9.766	8.50433	0.477772
1388	17.8	9.766	6.104	9.888	8.586	0.48236
1389	17.8	9.277	6.714	10.254	8.74833	0.491479
1390	17.8	10.01	6.104	9.277	8.46367	0.475487
1391	17.8	9.888	5.981	9.521	8.46333	0.475468
1392	17.8	9.766	6.348	9.766	8.62667	0.484644
1393	17.8	9.644	6.104	10.01	8.586	0.48236
1394	17.8	9.521	5.371	9.277	8.05633	0.452603
1395	17.9	9.155	5.615	9.766	8.17867	0.456909
1396	17.9	9.644	6.348	9.644	8.54533	0.477393
1397	17.9	9.033	5.371	9.766	8.05667	0.450093
1398	17.9	9.277	5.859	9.888	8.34133	0.465996
1399	17.9	9.033	6.104	9.399	8.17867	0.456909
1400	17.9	9.521	5.981	9.766	8.42267	0.47054
1401	17.9	9.888	5.859	9.521	8.42267	0.47054
1402	17.9	9.766	5.371	9.766	8.301	0.463743
1403	18	9.399	5.249	9.155	7.93433	0.440796
1404	18	9.277	5.249	10.376	8.30067	0.461148
1405	18	9.155	6.348	9.521	8.34133	0.463407
1406	18	9.155	5.737	9.766	8.21933	0.45663
1407	18	9.399	5.493	10.498	8.46333	0.470185
1408	18	10.254	5.493	9.888	8.545	0.474722
1409	18	9.766	5.493	9.155	8.138	0.452111
1410	18	9.521	5.737	8.667	7.975	0.443056
1411	18.1	9.155	5.493	9.399	8.01567	0.442855
1412	18.1	9.888	5.859	10.254	8.667	0.47884
1413	18.1	9.644	5.981	10.01	8.545	0.472099
1414	18.1	10.01	5.615	9.277	8.30067	0.4586
1415	18.1	9.399	5.005	9.766	8.05667	0.44512
1416	18.1	9.521	5.249	9.521	8.097	0.447348
1417	18.1	9.033	4.761	10.254	8.016	0.442873
1418	18.2	8.789	5.371	9.888	8.016	0.44044
1419	18.2	9.644	5.371	9.644	8.21967	0.45163
1420	18.2	9.521	5.371	10.254	8.382	0.460549
1421	18.2	9.766	5.005	9.399	8.05667	0.442674
1422	18.2	10.01	4.883	9.399	8.09733	0.444908
1423	18.2	8.789	5.615	8.789	7.731	0.42478
1424	18.2	9.277	5.737	10.01	8.34133	0.458315
1425	18.2	10.01	5.981	9.766	8.58567	0.47174
1426	18.3	9.644	5.249	10.01	8.301	0.453607
1427	18.3	9.521	6.104	9.399	8.34133	0.455811
1428	18.3	10.132	5.371	9.766	8.423	0.460273
1429	18.3	9.766	5.493	9.399	8.21933	0.449144
1430	18.3	9.766	5.981	9.277	8.34133	0.455811
1431	18.3	9.399	6.226	9.399	8.34133	0.455811
1432	18.3	9.766	5.249	9.888	8.301	0.453607
1433	18.3	9.644	5.127	10.254	8.34167	0.455829
1434	18.4	10.132	5.127	9.521	8.26	0.448913
1435	18.4	9.277	5.371	9.521	8.05633	0.437844
1436	18.4	8.911	5.371	9.521	7.93433	0.431214
1437	18.4	9.277	5.981	9.644	8.30067	0.451123
1438	18.4	9.521	5.737	10.132	8.46333	0.459964
1439	18.4	9.766	5.981	10.864	8.87033	0.482083
1440	18.4	9.644	5.615	10.376	8.545	0.464402
1441	18.4	9.521	5.493	9.644	8.21933	0.446703
1442	18.5	9.033	5.859	9.766	8.21933	0.444288
1443	18.5	9.277	5.981	9.766	8.34133	0.450883
1444	18.5	9.521	5.615	9.766	8.30067	0.448685
1445	18.5	9.521	5.615	10.132	8.42267	0.455279
1446	18.5	10.01	5.859	9.766	8.545	0.461892
1447	18.5	9.888	5.981	10.254	8.70767	0.470685
1448	18.5	9.277	5.981	9.155	8.13767	0.439874
1449	18.5	8.057	5.493	9.888	7.81267	0.422306
1450	18.6	9.033	5.737	9.399	8.05633	0.433136
1451	18.6	8.911	5.493	10.132	8.17867	0.439713
1452	18.6	8.911	5.127	9.888	7.97533	0.428781
1453	18.6	9.766	5.859	10.498	8.70767	0.468154
1454	18.6	9.399	5.005	10.01	8.138	0.437527
1455	18.6	9.033	5.615	9.399	8.01567	0.43095
1456	18.6	9.155	5.615	9.888	8.21933	0.4419
1457	18.6	9.521	5.737	10.62	8.626	0.463763
1458	18.7	9.521	5.249	10.01	8.26	0.441711
1459	18.7	10.498	5.005	9.644	8.38233	0.448253
1460	18.7	9.766	5.981	10.132	8.62633	0.461301
1461	18.7	9.888	5.493	9.766	8.38233	0.448253
1462	18.7	9.399	5.493	10.132	8.34133	0.446061
1463	18.7	9.766	6.104	10.132	8.66733	0.463494
1464	18.7	10.132	5.371	10.498	8.667	0.463476
1465	18.8	9.888	5.493	10.376	8.58567	0.456684
1466	18.8	9.888	5.005	10.376	8.423	0.448032
1467	18.8	10.376	6.348	9.521	8.74833	0.465337
1468	18.8	9.277	5.615	8.911	7.93433	0.422039
1469	18.8	9.766	6.714	10.498	8.99267	0.478333
1470	18.8	9.521	5.737	10.376	8.54467	0.454504
1471	18.8	10.132	5.859	10.01	8.667	0.461011
1472	18.8	10.01	5.371	10.376	8.58567	0.456684
1473	18.9	11.108	5.615	10.376	9.033	0.477937
1474	18.9	10.254	5.127	10.132	8.50433	0.449965
1475	18.9	10.132	5.859	9.766	8.58567	0.454268
1476	18.9	10.01	6.714	10.62	9.11467	0.482257
1477	18.9	10.01	5.371	10.376	8.58567	0.454268
1478	18.9	9.888	4.883	10.254	8.34167	0.441358
1479	18.9	10.01	5.371	10.498	8.62633	0.45642
1480	18.9	10.376	5.371	9.399	8.382	0.443492
1481	19	10.254	5.249	9.521	8.34133	0.439018
1482	19	10.01	5.981	9.766	8.58567	0.451877
1483	19	9.766	6.104	10.62	8.83	0.464737
1484	19	10.01	5.737	10.498	8.74833	0.460439
1485	19	9.644	5.737	9.644	8.34167	0.439035
1486	19	10.01	5.859	9.399	8.42267	0.443298
1487	19	10.254	5.493	9.399	8.382	0.441158
1488	19	10.132	5.859	10.62	8.87033	0.46686
1489	19.1	10.254	5.127	9.766	8.38233	0.438866
1490	19.1	9.888	5.615	9.399	8.30067	0.43459
1491	19.1	9.888	5.005	10.254	8.38233	0.438866
1492	19.1	10.01	5.615	9.277	8.30067	0.43459
1493	19.1	9.644	5.371	9.888	8.301	0.434607
1494	19.1	9.644	6.47	9.521	8.545	0.447382
1495	19.1	10.01	5.859	10.376	8.74833	0.458028
1496	19.1	9.277	5.249	9.766	8.09733	0.423944
1497	19.2	10.498	5.493	9.399	8.46333	0.440799
1498	19.2	10.742	5.859	10.254	8.95167	0.466233
1499	19.2	10.62	5.737	10.742	9.033	0.470469
1500	19.2	10.01	5.615	9.766	8.46367	0.440816
1501	19.2	10.01	5.249	10.254	8.50433	0.442934
1502	19.2	10.132	5.615	10.742	8.82967	0.459878
1503	19.2	10.376	5.127	9.766	8.423	0.438698
1504	19.3	10.498	5.493	9.033	8.34133	0.432193
1505	19.3	10.62	5.371	9.766	8.58567	0.444853
1506	19.3	10.254	5.859	9.766	8.62633	0.44696
1507	19.3	10.62	5.981	10.742	9.11433	0.472245
1508	19.3	9.766	5.859	10.01	8.545	0.442746
1509	19.3	9.766	5.859	10.01	8.545	0.442746
1510	19.3	9.888	5.371	9.399	8.21933	0.425872
1511	19.3	10.376	5.493	10.376	8.74833	0.453282
1512	19.4	10.254	6.348	10.132	8.91133	0.459347
1513	19.4	10.498	5.859	10.01	8.789	0.453041
1514	19.4	9.888	6.592	10.62	9.03333	0.465636
1515	19.4	10.498	5.859	10.864	9.07367	0.467715
1516	19.4	10.01	5.737	10.376	8.70767	0.448849
1517	19.4	10.498	5.493	9.888	8.62633	0.444656
1518	19.4	10.254	6.104	10.376	8.91133	0.459347
1519	19.4	10.986	6.104	10.132	9.074	0.467732
1520	19.5	11.108	5.493	10.01	8.87033	0.454889
1521	19.5	10.376	5.371	9.033	8.26	0.42359
1522	19.5	10.376	5.005	10.376	8.58567	0.440291
1523	19.5	10.62	5.615	9.155	8.46333	0.434017
1524	19.5	10.62	5.127	8.789	8.17867	0.419419
1525	19.5	10.376	5.859	10.132	8.789	0.450718
1526	19.5	10.864	6.104	10.01	8.99267	0.461162
1527	19.5	10.498	5.615	10.132	8.74833	0.448632
1528	19.6	10.254	5.981	10.132	8.789	0.448418
1529	19.6	10.498	5.615	10.376	8.82967	0.450493
1530	19.6	10.376	5.249	10.01	8.545	0.435969
1531	19.6	10.132	5.981	10.01	8.70767	0.444269
1532	19.6	10.498	6.348	10.132	8.99267	0.45881
1533	19.6	10.376	6.348	10.376	9.03333	0.460884
1534	19.6	10.62	5.737	10.254	8.87033	0.452568
1535	19.6	10.498	5.371	10.254	8.70767	0.444269
1536	19.7	10.132	5.859	10.132	8.70767	0.442014
1537	19.7	10.376	6.226	9.766	8.78933	0.446159
1538	19.7	10.01	6.348	10.742	9.03333	0.458545
1539	19.7	10.01	5.859	10.254	8.70767	0.442014
1540	19.7	10.132	5.737	10.62	8.82967	0.448206
1541	19.7	10.254	5.859	9.888	8.667	0.439949
1542	19.7	10.254	5.371	10.01	8.545	0.433756
1543	19.8	10.864	5.615	10.376	8.95167	0.452104
1544	19.8	10.498	5.493	10.132	8.70767	0.439781
1545	19.8	9.888	6.226	10.376	8.83	0.44596
1546	19.8	9.766	6.104	10.376	8.74867	0.441852
1547	19.8	9.521	5.371	10.498	8.46333	0.427441
1548	19.8	10.132	5.249	10.498	8.62633	0.435673
1549	19.8	9.399	5.005	10.498	8.30067	0.419226
1550	19.8	10.254	5.737	9.888	8.62633	0.435673
1551	19.9	10.132	5.615	10.376	8.70767	0.437571
1552	19.9	10.01	5.981	10.986	8.99233	0.451876
1553	19.9	8.911	5.249	10.986	8.382	0.421206
1554	19.9	9.888	5.493	9.644	8.34167	0.419179
1555	19.9	10.254	5.859	9.644	8.58567	0.431441
1556	19.9	10.864	5.493	10.132	8.82967	0.443702
1557	19.9	10.864	5.615	10.498	8.99233	0.451876
1558	19.9	10.254	5.737	10.132	8.70767	0.437571
1559	20	10.742	5.615	10.62	8.99233	0.449617
1560	20	10.864	5.371	10.742	8.99233	0.449617
1561	20	10.62	4.883	10.376	8.62633	0.431317
1562	20	10.376	6.104	10.62	9.03333	0.451667
1563	20	11.23	6.104	10.132	9.15533	0.457767
1564	20	10.132	5.249	10.254	8.545	0.42725
1565	20	11.353	5.493	10.498	9.11467	0.455733
1566	20	10.62	6.348	11.108	9.35867	0.467933
1567	20.1	10.62	5.859	9.766	8.74833	0.43524
1568	20.1	10.986	5.493	10.01	8.82967	0.439287
1569	20.1	11.23	6.348	10.132	9.23667	0.459536
1570	20.1	10.986	6.104	10.132	9.074	0.451443
1571	20.1	11.23	5.981	10.376	9.19567	0.457496
1572	20.1	10.742	5.249	10.498	8.82967	0.439287
1573	20.1	10.376	4.761	10.742	8.62633	0.429171
1574	20.1	10.376	5.371	10.132	8.62633	0.429171
1575	20.2	10.864	5.737	10.01	8.87033	0.439125
1576	20.2	10.986	5.859	10.01	8.95167	0.443152
1577	20.2	10.62	5.859	9.766	8.74833	0.433086
1578	20.2	9.766	5.981	10.742	8.82967	0.437112
1579	20.2	9.766	5.615	9.888	8.423	0.41698
1580	20.2	10.742	5.981	9.644	8.789	0.435099
1581	20.2	11.108	5.981	9.399	8.82933	0.437096
1582	20.2	11.108	6.226	9.888	9.074	0.449208
1583	20.3	10.376	5.859	10.01	8.74833	0.430952
1584	20.3	10.376	5.981	9.644	8.667	0.426946
1585	20.3	10.376	5.981	9.521	8.626	0.424926
1586	20.3	10.986	5.493	9.888	8.789	0.432956
1587	20.3	10.864	5.981	9.766	8.87033	0.436962
1588	20.3	10.742	5.859	9.155	8.58533	0.422923
1589	20.3	10.132	6.104	9.521	8.58567	0.422939
1590	20.4	10.986	6.592	9.644	9.074	0.444804
1591	20.4	10.01	5.859	9.277	8.382	0.410882
1592	20.4	10.62	5.615	9.521	8.58533	0.42085
1593	20.4	11.475	5.859	9.888	9.074	0.444804
1594	20.4	10.986	6.226	9.033	8.74833	0.42884
1595	20.4	10.864	6.226	10.254	9.11467	0.446797
1596	20.4	10.376	6.714	10.742	9.27733	0.454771
1597	20.4	10.864	5.737	10.132	8.911	0.436814
1598	20.5	10.62	5.615	10.254	8.82967	0.430715
1599	20.5	10.742	6.348	10.376	9.15533	0.446602
1600	20.5	10.742	6.47	10.132	9.11467	0.444618
1601	20.5	11.23	6.226	10.498	9.318	0.454537
1602	20.5	10.376	5.981	10.498	8.95167	0.436667
1603	20.5	11.23	6.348	9.521	9.033	0.440634
1604	20.5	11.108	6.592	10.498	9.39933	0.458504
1605	20.5	11.353	6.836	10.742	9.64367	0.470423
1606	20.6	11.353	6.47	10.132	9.31833	0.452346
1607	20.6	11.475	6.592	10.01	9.359	0.45432
1608	20.6	11.23	7.446	10.376	9.684	0.470097
1609	20.6	11.719	5.981	10.498	9.39933	0.456278
1610	20.6	10.864	6.348	10.376	9.196	0.446408
1611	20.6	11.353	6.104	9.033	8.83	0.428641
1612	20.6	11.841	6.836	10.01	9.56233	0.464191
1613	20.6	11.353	6.836	9.888	9.359	0.45432
1614	20.7	11.353	6.348	9.521	9.074	0.438357
1615	20.7	10.742	6.226	10.62	9.196	0.444251
1616	20.7	11.353	6.592	10.01	9.31833	0.450161
1617	20.7	10.62	6.348	10.132	9.03333	0.436393
1618	20.7	10.986	5.981	9.766	8.911	0.430483
1619	20.7	12.573	6.226	10.376	9.725	0.469807
1620	20.7	12.207	6.226	9.888	9.44033	0.456055
1621	20.7	11.719	6.592	9.521	9.27733	0.44818
1622	20.8	11.719	6.348	9.399	9.15533	0.44016
1623	20.8	11.23	6.47	10.132	9.27733	0.446026
1624	20.8	11.719	6.226	10.254	9.39967	0.451907
1625	20.8	11.841	6.226	9.888	9.31833	0.447997
1626	20.8	12.085	5.981	9.033	9.033	0.434279
1627	20.8	11.475	6.348	9.888	9.237	0.444087
1628	20.8	11.841	6.958	10.01	9.603	0.461683
1629	20.9	10.62	5.981	9.644	8.74833	0.418581
1630	20.9	11.719	6.47	10.132	9.44033	0.451691
1631	20.9	12.329	6.958	9.644	9.64367	0.461419
1632	20.9	12.695	6.714	9.766	9.725	0.465311
1633	20.9	11.719	6.47	10.132	9.44033	0.451691
1634	20.9	11.353	6.47	9.033	8.952	0.428325
1635	20.9	10.986	7.202	10.498	9.562	0.457512
1636	20.9	11.719	7.568	10.498	9.92833	0.47504
1637	21	11.353	6.226	10.864	9.481	0.451476
1638	21	11.597	6.714	9.766	9.359	0.445667
1639	21	11.475	6.714	10.376	9.52167	0.453413
1640	21	11.963	6.714	10.498	9.725	0.463095
1641	21	11.475	6.714	10.132	9.44033	0.44954
1642	21	10.864	6.47	9.888	9.074	0.432095
1643	21	11.353	6.104	9.399	8.952	0.426286
1644	21	11.841	6.47	10.01	9.44033	0.44954
1645	21.1	11.353	6.592	10.376	9.44033	0.447409
1646	21.1	11.475	6.226	10.132	9.27767	0.4397
1647	21.1	11.23	7.08	10.254	9.52133	0.451248
1648	21.1	11.719	6.47	9.766	9.31833	0.441627
1649	21.1	11.841	6.714	10.62	9.725	0.4609
1650	21.1	12.085	6.836	9.766	9.56233	0.453191
1651	21.1	11.963	6.592	10.132	9.56233	0.453191
1652	21.1	12.207	6.958	9.033	9.39933	0.445466
1653	21.2	10.864	6.714	9.766	9.11467	0.429937
1654	21.2	11.963	7.202	9.766	9.64367	0.45489
1655	21.2	11.475	6.836	10.254	9.52167	0.449135
1656	21.2	11.597	6.714	9.521	9.27733	0.43761
1657	21.2	12.329	6.348	9.766	9.481	0.447217
1658	21.2	12.207	6.836	10.498	9.847	0.464481
1659	21.2	11.353	6.958	9.521	9.27733	0.43761
1660	21.2	11.719	7.08	10.254	9.68433	0.456808
1661	21.3	11.841	7.324	10.62	9.92833	0.466119
1662	21.3	10.742	7.446	10.376	9.52133	0.447011
1663	21.3	11.597	7.202	10.01	9.603	0.450845
1664	21.3	11.963	6.958	10.498	9.80633	0.460391
1665	21.3	12.329	6.47	9.888	9.56233	0.448936
1666	21.3	12.817	7.202	9.766	9.92833	0.466119
1667	21.3	12.207	6.958	9.888	9.68433	0.454664
1668	21.4	11.841	6.714	10.01	9.52167	0.444938
1669	21.4	12.085	6.592	10.498	9.725	0.454439
1670	21.4	11.719	7.446	10.132	9.76567	0.45634
1671	21.4	11.841	7.813	9.766	9.80667	0.458255
1672	21.4	11.719	7.935	9.888	9.84733	0.460156
1673	21.4	11.841	7.568	9.766	9.725	0.454439
1674	21.4	11.841	7.202	9.888	9.64367	0.450639
1675	21.4	11.963	6.714	10.132	9.603	0.448738
1676	21.5	11.108	7.08	10.254	9.48067	0.440961
1677	21.5	11.108	6.836	10.376	9.44	0.43907
1678	21.5	10.986	6.592	10.376	9.318	0.433395
1679	21.5	11.108	7.202	10.62	9.64333	0.448527
1680	21.5	12.085	6.836	10.864	9.92833	0.461783
1681	21.5	12.085	7.446	10.254	9.92833	0.461783
1682	21.5	11.475	6.714	10.864	9.68433	0.450434
1683	21.5	11.963	7.324	10.742	10.0097	0.465566
1684	21.6	11.475	6.714	10.742	9.64367	0.446466
1685	21.6	11.719	6.836	10.01	9.52167	0.440818
1686	21.6	10.986	6.348	10.498	9.27733	0.429506
1687	21.6	11.841	6.958	10.62	9.80633	0.453997
1688	21.6	11.841	6.348	10.498	9.56233	0.442701
1689	21.6	11.597	7.324	10.62	9.847	0.45588
1690	21.6	10.742	7.568	10.254	9.52133	0.440802
1691	21.6	11.353	7.202	10.742	9.76567	0.452114
1692	21.7	12.207	7.568	10.62	10.1317	0.466897
1693	21.7	11.353	7.202	10.62	9.725	0.448157
1694	21.7	11.475	6.836	10.132	9.481	0.436912
1695	21.7	11.597	6.226	11.108	9.64367	0.444409
1696	21.7	11.475	7.08	11.23	9.92833	0.457527
1697	21.7	11.353	7.08	11.23	9.88767	0.455653
1698	21.7	11.353	6.958	10.62	9.64367	0.444409
1699	21.7	10.864	7.08	10.742	9.562	0.440645
1700	21.8	11.475	8.057	10.62	10.0507	0.46104
1701	21.8	11.841	7.08	10.864	9.92833	0.455428
1702	21.8	10.986	6.836	10.986	9.60267	0.440489
1703	21.8	11.108	7.446	10.62	9.72467	0.446086
1704	21.8	11.841	7.446	10.986	10.091	0.46289
1705	21.8	11.353	7.202	10.742	9.76567	0.447966
1706	21.8	11.597	7.324	10.742	9.88767	0.453563
1707	21.8	11.597	6.958	11.108	9.88767	0.453563
1708	21.9	11.719	7.568	10.742	10.0097	0.457062
1709	21.9	10.498	7.08	10.62	9.39933	0.429193
1710	21.9	11.719	7.202	10.132	9.68433	0.442207
1711	21.9	10.62	7.446	10.62	9.562	0.436621
1712	21.9	11.353	7.202	10.62	9.725	0.444064
1713	21.9	11.353	7.324	10.986	9.88767	0.451492
1714	21.9	11.719	6.592	10.62	9.64367	0.44035
1715	22	11.353	6.958	10.864	9.725	0.442045
1716	22	11.353	7.324	10.254	9.64367	0.438348
1717	22	10.986	6.958	10.62	9.52133	0.432788
1718	22	11.353	7.568	11.108	10.0097	0.454985
1719	22	10.986	7.568	10.864	9.806	0.445727
1720	22	11.353	7.08	11.23	9.88767	0.449439
1721	22	11.475	6.836	11.23	9.847	0.447591
1722	22	11.108	7.08	10.986	9.72467	0.44203
1723	22.1	10.986	7.202	10.376	9.52133	0.43083
1724	22.1	10.742	7.202	11.353	9.76567	0.441885
1725	22.1	10.864	6.714	11.23	9.60267	0.43451
1726	22.1	11.841	6.47	11.353	9.888	0.447421
1727	22.1	11.353	6.592	10.864	9.603	0.434525
1728	22.1	11.108	6.47	11.108	9.562	0.43267
1729	22.1	10.742	7.08	10.986	9.60267	0.43451
1730	22.1	11.23	7.69	11.108	10.0093	0.452911
1731	22.2	10.62	6.592	11.841	9.68433	0.436231
1732	22.2	11.353	7.08	11.353	9.92867	0.447237
1733	22.2	10.864	7.08	11.108	9.684	0.436216
1734	22.2	10.62	6.714	10.986	9.44	0.425225
1735	22.2	10.986	7.324	11.719	10.0097	0.450886
1736	22.2	10.254	7.324	10.864	9.48067	0.427057
1737	22.2	10.742	7.202	11.719	9.88767	0.44539
1738	22.2	10.498	7.568	12.329	10.1317	0.456381
1739	22.3	10.986	6.836	11.841	9.88767	0.443393
1740	22.3	10.864	6.226	11.23	9.44	0.423318
1741	22.3	11.353	7.202	10.254	9.603	0.430628
1742	22.3	10.986	7.202	11.108	9.76533	0.437907
1743	22.3	11.108	7.935	10.986	10.0097	0.448864
1744	22.3	10.986	7.324	11.108	9.806	0.439731
1745	22.3	10.986	7.568	11.23	9.928	0.445202
1746	22.3	11.475	7.08	11.353	9.96933	0.447055
1747	22.4	10.986	7.446	11.353	9.92833	0.443229
1748	22.4	11.719	7.08	10.742	9.847	0.439598
1749	22.4	10.742	7.202	11.108	9.684	0.432321
1750	22.4	11.23	7.935	10.986	10.0503	0.448676
1751	22.4	10.986	7.324	11.353	9.88767	0.441414
1752	22.4	11.108	6.226	11.841	9.725	0.434152
1753	22.4	11.23	6.836	11.23	9.76533	0.435952
1754	22.5	11.23	7.202	10.376	9.60267	0.426785
1755	22.5	11.353	7.69	10.742	9.92833	0.441259
1756	22.5	12.085	7.568	10.986	10.213	0.453911
1757	22.5	11.353	8.301	11.597	10.417	0.462978
1758	22.5	10.986	7.08	11.23	9.76533	0.434015
1759	22.5	12.207	7.08	10.376	9.88767	0.439452
1760	22.5	11.597	7.446	10.498	9.847	0.437644
1761	22.5	11.597	7.568	10.742	9.969	0.443067
1762	22.6	11.108	7.202	11.23	9.84667	0.435693
1763	22.6	11.108	7.202	11.23	9.84667	0.435693
1764	22.6	11.108	7.08	11.353	9.847	0.435708
1765	22.6	11.719	7.202	11.23	10.0503	0.444705
1766	22.6	10.864	6.592	10.498	9.318	0.412301
1767	22.6	10.864	7.202	11.108	9.72467	0.430295
1768	22.6	10.62	7.324	10.864	9.60267	0.424897
1769	22.6	11.108	7.568	10.986	9.88733	0.437493
1770	22.7	11.108	7.08	11.108	9.76533	0.430191
1771	22.7	10.62	6.592	11.841	9.68433	0.426623
1772	22.7	10.254	7.08	11.597	9.64367	0.424831
1773	22.7	10.986	6.714	11.23	9.64333	0.424816
1774	22.7	11.719	7.813	10.986	10.1727	0.448135
1775	22.7	10.62	7.69	11.841	10.0503	0.442746
1776	22.7	11.23	7.446	11.963	10.213	0.449912
1777	22.7	10.986	6.836	11.475	9.76567	0.430206
1778	22.8	10.742	7.202	11.475	9.80633	0.430102
1779	22.8	11.108	6.592	11.963	9.88767	0.43367
1780	22.8	10.376	6.836	11.719	9.64367	0.422968
1781	22.8	11.108	6.714	10.864	9.562	0.419386
1782	22.8	10.742	6.592	12.085	9.80633	0.430102
1783	22.8	11.23	6.836	12.085	10.0503	0.440804
1784	22.8	10.498	6.836	12.207	9.847	0.431886
1785	22.8	11.353	6.714	11.353	9.80667	0.430117
1786	22.9	11.23	7.69	10.986	9.96867	0.435313
1787	22.9	11.353	6.592	11.353	9.766	0.426463
1788	22.9	11.23	7.202	10.864	9.76533	0.426434
1789	22.9	10.986	7.324	11.353	9.88767	0.431776
1790	22.9	10.62	7.08	11.719	9.80633	0.428224
1791	22.9	10.864	7.568	11.963	10.1317	0.442431
1792	22.9	10.742	7.202	11.108	9.684	0.422882
1793	23	11.23	7.935	10.742	9.969	0.433435
1794	23	11.475	7.324	11.23	10.0097	0.435203
1795	23	10.986	7.69	11.597	10.091	0.438739
1796	23	11.108	7.568	10.986	9.88733	0.429884
1797	23	10.742	7.813	10.986	9.847	0.42813
1798	23	11.108	7.935	11.719	10.254	0.445826
1799	23	11.108	7.813	11.963	10.2947	0.447594
1800	23	11.475	7.69	11.353	10.1727	0.44229
1801	23.1	11.597	7.813	10.986	10.132	0.438615
1802	23.1	11.23	7.813	11.841	10.2947	0.445657
1803	23.1	10.742	7.08	11.108	9.64333	0.41746
1804	23.1	11.353	7.08	10.62	9.68433	0.419235
1805	23.1	11.719	7.813	11.353	10.295	0.445671
1806	23.1	11.353	8.057	11.353	10.2543	0.443911
1807	23.1	10.254	7.202	11.475	9.64367	0.417475
1808	23.1	10.254	7.324	11.475	9.68433	0.419235
1809	23.2	10.62	7.202	11.23	9.684	0.417414
1810	23.2	11.963	7.08	11.841	10.2947	0.443736
1811	23.2	10.742	7.202	11.719	9.88767	0.426193
1812	23.2	11.353	7.69	12.085	10.376	0.447241
1813	23.2	11.475	6.958	11.841	10.0913	0.434971
1814	23.2	11.108	7.446	10.742	9.76533	0.42092
1815	23.2	10.62	6.47	11.475	9.52167	0.410417
1816	23.2	10.132	6.592	11.108	9.27733	0.399885
1817	23.3	10.498	6.714	10.864	9.35867	0.40166
1818	23.3	11.353	6.836	11.108	9.76567	0.419127
1819	23.3	11.23	7.202	11.23	9.88733	0.424349
1820	23.3	11.475	6.714	11.963	10.0507	0.431359
1821	23.3	11.353	6.47	11.475	9.766	0.419142
1822	23.3	10.498	6.836	12.329	9.88767	0.424363
1823	23.3	11.353	6.226	10.986	9.52167	0.408655
1824	23.3	11.23	6.714	11.23	9.72467	0.417368
1825	23.4	11.841	6.592	11.108	9.847	0.420812
1826	23.4	11.108	6.592	11.841	9.847	0.420812
1827	23.4	11.597	6.592	11.108	9.76567	0.417336
1828	23.4	10.62	6.836	10.986	9.48067	0.405157
1829	23.4	11.108	6.714	11.597	9.80633	0.419074
1830	23.4	11.23	6.836	10.986	9.684	0.413846
1831	23.4	11.353	6.958	12.085	10.132	0.432991
1832	23.4	12.207	7.813	11.719	10.5797	0.452123
1833	23.5	11.353	7.202	10.864	9.80633	0.417291
1834	23.5	10.498	6.836	10.742	9.35867	0.398241
1835	23.5	11.23	6.836	11.719	9.92833	0.422482
1836	23.5	11.23	7.08	12.207	10.1723	0.432865
1837	23.5	11.841	6.836	11.23	9.969	0.424213
1838	23.5	11.23	6.836	10.864	9.64333	0.410355
1839	23.5	10.864	7.446	11.108	9.806	0.417277
1840	23.6	11.23	6.958	11.23	9.806	0.415508
1841	23.6	11.597	7.446	10.864	9.969	0.422415
1842	23.6	11.23	7.202	11.353	9.92833	0.420692
1843	23.6	11.475	7.08	11.108	9.88767	0.418969
1844	23.6	11.475	6.958	10.986	9.80633	0.415523
1845	23.6	11.475	7.08	11.108	9.88767	0.418969
1846	23.6	10.742	6.958	11.23	9.64333	0.408616
1847	23.6	11.353	7.568	11.108	10.0097	0.424138
1848	23.7	11.353	6.592	11.475	9.80667	0.413783
1849	23.7	11.841	7.08	10.62	9.847	0.415485
1850	23.7	11.841	7.446	10.01	9.76567	0.412053
1851	23.7	11.108	7.446	10.864	9.806	0.413755
1852	23.7	11.108	7.202	11.23	9.84667	0.415471
1853	23.7	11.23	7.202	11.108	9.84667	0.415471
1854	23.7	10.742	6.47	10.864	9.35867	0.39488
1855	23.7	11.597	6.592	10.742	9.64367	0.406906
1856	23.8	11.597	6.592	10.864	9.68433	0.406905
1857	23.8	11.353	6.592	10.742	9.56233	0.401779
1858	23.8	11.475	7.08	10.864	9.80633	0.412031
1859	23.8	10.986	7.324	10.864	9.72467	0.408599
1860	23.8	10.742	7.202	11.719	9.88767	0.415448
1861	23.8	11.475	7.446	10.986	9.969	0.418866
1862	23.8	11.108	6.836	10.986	9.64333	0.405182
1863	23.8	11.353	7.08	10.742	9.725	0.408613
1864	23.9	11.475	7.446	10.376	9.76567	0.408605
1865	23.9	10.742	7.446	11.353	9.847	0.412008
1866	23.9	11.475	6.958	10.864	9.76567	0.408605
1867	23.9	11.597	6.958	11.963	10.1727	0.425635
1868	23.9	11.108	7.446	11.108	9.88733	0.413696
1869	23.9	11.841	7.324	10.864	10.0097	0.418815
1870	23.9	11.841	6.958	10.864	9.88767	0.41371
1871	23.9	11.23	7.568	10.864	9.88733	0.413696
1872	24	11.108	7.568	11.475	10.0503	0.418764
1873	24	10.986	7.69	11.108	9.928	0.413667
1874	24	11.475	7.568	11.23	10.091	0.420458
1875	24	11.353	6.958	11.23	9.847	0.410292
1876	24	11.475	7.08	10.62	9.725	0.405208
1877	24	11.475	6.958	11.108	9.847	0.410292
1878	24	11.23	8.057	10.62	9.969	0.415375
1879	24.1	10.864	7.813	11.108	9.92833	0.411964
1880	24.1	11.963	7.08	10.498	9.847	0.408589
1881	24.1	11.719	6.836	11.108	9.88767	0.410277
1882	24.1	11.841	7.08	11.23	10.0503	0.417026
1883	24.1	10.986	7.935	10.864	9.92833	0.411964
1884	24.1	10.864	7.935	11.719	10.1727	0.422102
1885	24.1	11.23	7.935	10.742	9.969	0.413651
1886	24.1	11.108	7.446	10.986	9.84667	0.408575
1887	24.2	11.719	7.935	10.498	10.0507	0.415317
1888	24.2	12.329	7.446	10.864	10.213	0.422025
1889	24.2	11.963	7.08	10.864	9.969	0.411942
1890	24.2	11.353	7.324	10.01	9.56233	0.395138
1891	24.2	11.597	7.446	10.62	9.88767	0.408581
1892	24.2	11.963	7.935	10.498	10.132	0.418678
1893	24.2	11.841	7.813	10.864	10.1727	0.420358
1894	24.2	11.841	7.08	10.254	9.725	0.40186
1895	24.3	10.986	7.813	10.132	9.64367	0.396859
1896	24.3	11.353	7.202	10.742	9.76567	0.401879
1897	24.3	11.597	8.179	10.864	10.2133	0.420302
1898	24.3	11.353	7.446	11.353	10.0507	0.413608
1899	24.3	10.62	7.69	10.62	9.64333	0.396845
1900	24.3	12.085	7.08	10.986	10.0503	0.413594
1901	24.3	11.841	7.446	10.864	10.0503	0.413594
1902	24.3	11.719	7.69	10.376	9.92833	0.408573
1903	24.4	10.742	7.446	10.376	9.52133	0.390219
1904	24.4	11.23	7.568	10.742	9.84667	0.403552
1905	24.4	11.353	8.179	11.23	10.254	0.420246
1906	24.4	12.085	7.446	10.498	10.0097	0.410232
1907	24.4	11.475	7.69	10.742	9.969	0.408566
1908	24.4	12.085	6.958	10.132	9.725	0.398566
1909	24.4	11.719	7.69	10.01	9.80633	0.401899
1910	24.4	13.062	7.568	9.766	10.132	0.415246
1911	24.5	12.207	7.202	10.254	9.88767	0.403578
1912	24.5	11.963	7.446	11.23	10.213	0.416857
1913	24.5	11.719	7.202	10.864	9.92833	0.405238
1914	24.5	11.108	7.69	9.521	9.43967	0.385293
1915	24.5	11.597	7.568	10.01	9.725	0.396939
1916	24.5	11.719	7.568	9.888	9.725	0.396939
1917	24.5	11.719	7.813	10.742	10.0913	0.411891
1918	24.6	12.085	7.69	10.864	10.213	0.415163
1919	24.6	11.719	7.324	11.108	10.0503	0.40855
1920	24.6	11.841	6.958	10.742	9.847	0.400285
1921	24.6	11.841	7.568	9.888	9.76567	0.396978
1922	24.6	11.475	7.324	10.62	9.80633	0.398631
1923	24.6	11.108	7.446	10.742	9.76533	0.396965
1924	24.6	11.23	7.446	11.108	9.928	0.403577
1925	24.6	11.353	7.813	10.498	9.888	0.401951
1926	24.7	11.353	6.714	10.742	9.603	0.388785
1927	24.7	11.719	7.446	10.132	9.76567	0.395371
1928	24.7	11.841	6.958	10.742	9.847	0.398664
1929	24.7	11.353	7.813	10.498	9.888	0.400324
1930	24.7	11.108	7.69	10.864	9.88733	0.400297
1931	24.7	11.963	7.446	11.719	10.376	0.420081
1932	24.7	11.841	7.08	10.132	9.68433	0.392078
1933	24.7	11.475	7.08	9.766	9.44033	0.3822
1934	24.8	11.23	7.813	10.62	9.88767	0.398696
1935	24.8	11.475	7.568	10.132	9.725	0.392137
1936	24.8	11.108	7.935	10.62	9.88767	0.398696
1937	24.8	11.841	7.324	10.742	9.969	0.401976
1938	24.8	11.475	6.836	10.986	9.76567	0.393777
1939	24.8	11.353	7.935	10.498	9.92867	0.400349
1940	24.8	11.719	7.568	9.888	9.725	0.392137
1941	24.8	12.085	8.423	10.498	10.3353	0.416747
1942	24.9	11.719	7.935	10.742	10.132	0.406908
1943	24.9	11.475	7.935	10.254	9.888	0.397108
1944	24.9	11.475	7.202	10.62	9.76567	0.392195
1945	24.9	11.597	6.958	10.376	9.64367	0.387296
1946	24.9	12.207	7.202	10.498	9.969	0.400361
1947	24.9	11.963	7.324	10.498	9.92833	0.398728
1948	24.9	11.353	7.568	9.644	9.52167	0.382396
1949	24.9	11.597	7.446	10.864	9.969	0.400361
1950	25	11.841	7.813	10.62	10.0913	0.403653
1951	25	11.719	7.202	10.62	9.847	0.39388
1952	25	11.719	7.446	10.742	9.969	0.39876
1953	25	12.329	7.568	10.498	10.1317	0.405267
1954	25	11.475	7.446	10.62	9.847	0.39388
1955	25	11.353	8.179	10.986	10.1727	0.406907
1956	25	11.963	8.057	10.864	10.2947	0.411787
1957	25	11.841	8.179	10.864	10.2947	0.411787
1958	25.1	12.207	7.69	10.62	10.1723	0.405272
1959	25.1	11.841	7.935	10.742	10.1727	0.405286
1960	25.1	11.841	8.301	10.498	10.2133	0.406906
1961	25.1	11.108	8.179	10.62	9.969	0.397171
1962	25.1	11.841	8.301	11.23	10.4573	0.416627
1963	25.1	11.108	7.202	10.864	9.72467	0.387437
1964	25.1	10.986	7.446	10.62	9.684	0.385817
1965	25.2	11.23	7.813	10.62	9.88767	0.392368
1966	25.2	11.719	8.423	11.475	10.539	0.418214
1967	25.2	11.841	8.789	11.841	10.8237	0.429511
1968	25.2	10.986	8.301	10.864	10.0503	0.398823
1969	25.2	11.108	8.545	11.353	10.3353	0.410132
1970	25.2	11.475	7.813	10.864	10.0507	0.398836
1971	25.2	11.108	8.301	11.23	10.213	0.405278
1972	25.2	12.085	8.423	11.23	10.5793	0.419815
1973	25.3	11.475	8.789	10.864	10.376	0.410119
1974	25.3	11.23	8.423	11.353	10.3353	0.408511
1975	25.3	11.108	8.057	11.353	10.1727	0.402082
1976	25.3	10.986	8.789	11.963	10.5793	0.418155
1977	25.3	11.108	7.935	11.597	10.2133	0.403689
1978	25.3	11.353	8.301	10.742	10.132	0.400474
1979	25.3	11.353	8.911	11.475	10.5797	0.418169
1980	25.3	11.108	8.667	11.841	10.5387	0.416548
1981	25.4	11.597	8.667	12.085	10.783	0.424528
1982	25.4	11.353	7.568	11.841	10.254	0.403701
1983	25.4	10.864	7.813	12.085	10.254	0.403701
1984	25.4	11.108	7.69	11.719	10.1723	0.400486
1985	25.4	11.23	8.301	11.353	10.2947	0.405302
1986	25.4	11.108	8.545	11.719	10.4573	0.411706
1987	25.4	11.353	8.301	11.841	10.4983	0.41332
1988	25.4	10.864	7.935	12.085	10.2947	0.405302
1989	25.5	11.108	7.813	11.841	10.254	0.402118
1990	25.5	10.864	8.179	12.451	10.498	0.411686
1991	25.5	11.353	8.057	11.353	10.2543	0.402131
1992	25.5	10.986	8.423	11.841	10.4167	0.408497
1993	25.5	11.23	8.179	11.719	10.376	0.406902
1994	25.5	11.475	8.179	11.841	10.4983	0.411699
1995	25.5	11.108	8.545	11.475	10.376	0.406902
1996	25.5	11.108	9.277	10.864	10.4163	0.408484
1997	25.6	10.986	8.667	11.963	10.5387	0.411667
1998	25.6	11.841	8.789	11.475	10.7017	0.418034
[truncated: 60,501 more rows]
