# Supplementary material for: Evaluation of the extent of damage to the esophageal wall caused by press-through package ingestion
Source: PeerJ. 2019 Apr 18;7:e6763. doi: 10.7717/peerj.6763 (PMC6475578; doi:10.7717/peerj.6763)
Supplement: Dataset S3 [file peerj-07-6763-s020.xlsx]

## Sheet: Sheet3
Load[g]	COF(porcine)	COF(silicon)
0	#DIV/0!	#DIV/0!
0	#DIV/0!	#DIV/0!
0	#DIV/0!	#DIV/0!
0	#DIV/0!	#DIV/0!
0.1	95.5931	-19.1233
0.1	95.7379	-15.0567
0.1	96.0574	-14.2433
0.1	97.6264	-10.1733
0.1	94.6331	-14.2433
0.1	95.4195	-15.8667
0.1	96.785	-21.16
0.1	99.081	-14.2433
0.2	47.0261	-8.13833
0.2	46.7505	-9.96833
0.2	48.7988	-6.30667
0.2	49.1043	-7.73167
0.2	47.1279	-10.58
0.2	47.3605	-9.36
0.2	48.7992	-7.12
0.2	48.7412	-7.12
0.3	32.1647	-5.29
0.3	31.2152	-6.24
0.3	31.3606	-5.01778
0.3	33.2979	-4.47556
0.3	33.2883	-6.64667
0.3	31.118	-4.74778
0.3	31.6803	-4.06889
0.3	33.54	-5.29
0.4	24.581	-4.17083
0.4	23.5132	-4.06833
0.4	24.0364	-3.45833
0.4	25.1261	-3.76417
0.4	24.5665	-2.54333
0.4	24.5085	-3.35667
0.4	24.1671	-3.56
0.4	24.356	-4.2725
0.5	19.4905	-3.66267
0.5	19.5546	-3.90667
0.5	19.2812	-2.44067
0.5	19.3046	-2.84867
0.5	19.8336	-3.01133
0.5	19.9498	-2.848
0.5	19.1244	-2.93
0.6	15.9952	-2.645
0.6	16.4845	-2.645
0.6	16.586	-2.37389
0.6	16.431	-2.16944
0.6	16.3826	-3.18778
0.6	16.4601	-3.18722
0.6	16.6394	-2.57722
0.6	16.7168	-1.56
0.7	14.0132	-2.15048
0.7	14.0173	-1.9181
0.7	14.2249	-2.26714
0.7	14.3578	-2.03429
0.7	13.9259	-2.61571
0.7	13.8802	-2.7319
0.7	14.3287	-2.32524
0.7	14.47	-2.84857
0.8	12.098	-1.72917
0.8	12.149	-2.74667
0.8	12.356	-2.13625
0.8	12.5704	-1.83125
0.8	12.4758	-1.72917
0.8	12.1198	-1.67833
0.8	12.4322	-2.03458
0.8	12.5413	-2.44125
0.9	10.8442	-1.22074
0.9	10.7797	-1.89889
0.9	10.9508	-2.35111
0.9	11.1736	-1.80852
0.9	11.1381	-1.3563
0.9	11.0413	-1.49185
0.9	10.6731	-2.66778
0.9	10.9702	-2.03481
1	10.1028	-1.872
1	9.98364	-1.709
1	9.72498	-1.91267
1	9.92843	-2.07533
1	10.1347	-1.66833
1	9.96902	-2.116
1	9.91971	-1.994
1	9.90512	-1.75
1.1	9.16578	-1.55364
1.1	9.12883	-1.44273
1.1	8.93861	-1.81273
1.1	8.84087	-1.62788
1.1	9.00732	-1.8497
1.1	9.29528	-1.40576
1.1	9.14996	-1.77545
1.2	8.25425	-1.39028
1.2	8.35113	-1.42444
1.2	8.46498	-1.28889
1.2	8.3996	-1.49194
1.2	8.08708	-1.62778
1.2	8.33899	-1.76306
1.2	8.51829	-1.45833
1.2	8.43593	-1.45833
1.3	7.63269	-1.72154
1.3	7.70648	-1.50231
1.3	7.7535	-1.25205
1.3	7.86755	-1.28333
1.3	7.75795	-0.907692
1.3	7.67299	-1.15821
1.3	7.75789	-1.18949
1.3	7.71766	-1.25179
1.4	7.21832	-1.19167
1.4	7.01073	-1.04643
1.4	7.14364	-1.01738
1.4	7.31588	-0.988333
1.4	7.39269	-1.01714
1.4	7.09172	-0.988333
1.4	7.14978	-0.930238
1.4	7.29306	-0.872143
1.5	6.73906	-0.895111
1.5	6.65765	-0.542444
1.5	6.66543	-0.488222
1.5	6.72549	-0.624
1.5	6.81271	-0.189778
1.5	6.74681	-0.624
1.5	6.68476	-0.488222
1.5	6.69254	-0.189778
1.6	6.37597	0.0254167
1.6	6.30152	0.0254167
1.6	6.19433	-0.1525
1.6	6.26155	-0.0254167
1.6	6.38506	0.330625
1.6	6.28516	0.457708
1.6	6.28881	0.126875
1.7	5.93934	0.335098
1.7	5.9787	0.119804
1.7	6.00262	0.383137
1.7	5.95134	0.454706
1.7	5.92403	0.382941
1.7	5.98039	0.550588
1.7	6.05562	0.502745
1.7	6.03511	0.454902
1.8	5.5868	0.700741
1.8	5.63201	0.746111
1.8	5.67073	0.678333
1.8	5.67079	0.700741
1.8	5.6579	0.881667
1.8	5.66757	0.949444
1.8	5.68688	1.10759
1.8	5.62073	1.10759
1.9	5.3356	1.02789
1.9	5.32797	1.26351
1.9	5.40748	1.09211
1.9	5.36005	1.3493
1.9	5.40598	1.34912
1.9	5.38454	1.28491
1.9	5.37689	1.34912
1.9	5.34169	1.67053
2	5.0659	1.424
2	5.03976	1.77
2	5.16183	1.79033
2	5.13275	1.9125
2	5.10371	1.85133
2	5.04267	1.99367
2	5.00631	1.831
2	5.10948	2.15667
2.1	4.86759	1.84079
2.1	4.86341	1.86016
2.1	4.86067	1.95698
2.1	4.79008	2.11206
2.1	4.8109	2.22825
2.1	4.84824	2.32508
2.1	4.84816	2.3446
2.2	4.64367	2.16394
2.2	4.64896	2.33061
2.2	4.62519	1.96045
2.2	4.65953	2.03455
2.2	4.6001	2.23788
2.2	4.67407	1.99742
2.2	4.73355	2.44136
2.2	4.68595	2.42288
2.3	4.4266	2.33536
2.3	4.40516	2.37072
2.3	4.39883	2.54754
2.3	4.43674	2.49449
2.3	4.40511	2.56536
2.3	4.40894	2.60072
2.3	4.42026	2.51217
2.3	4.40639	2.54768
2.4	4.22887	2.47542
2.4	4.20704	2.52625
2.4	4.29182	2.59403
2.4	4.31846	2.76347
2.4	4.28576	2.57708
2.4	4.26033	2.69569
2.4	4.22159	2.72972
2.4	4.29548	2.74653
2.5	4.15968	2.66933
2.5	4.11315	2.58787
2.5	4.09574	2.718
2.5	4.08758	2.65293
2.5	4.13062	2.75067
2.5	4.12249	2.75067
2.5	4.10389	2.92973
2.5	4.05972	2.75053
2.6	3.94491	2.59782
2.6	3.93263	2.67615
2.6	3.90245	2.59795
2.6	3.88901	2.59795
2.6	3.96616	2.72308
2.6	3.96057	2.64487
2.6	3.94827	2.9109
2.6	3.92258	2.73872
2.7	3.81713	2.65235
2.7	3.86125	2.65235
2.7	3.81174	2.65235
2.7	3.8139	2.68259
2.7	3.81711	2.71272
2.7	3.83111	2.66741
2.7	3.80527	2.71259
2.8	3.66936	2.60131
2.8	3.64653	2.61571
2.8	3.71713	2.51417
2.8	3.7171	2.7175
2.8	3.68806	2.55762
2.8	3.68077	2.57214
2.8	3.68179	2.55774
2.8	3.67558	2.51393
2.9	3.55588	2.48345
2.9	3.5729	2.31506
2.9	3.55186	2.49747
2.9	3.56888	2.46954
2.9	3.5308	2.38529
2.9	3.56187	2.35724
2.9	3.56588	2.32908
2.9	3.57788	2.28701
3	3.46833	2.22444
3	3.43344	2.29222
3	3.43927	2.19722
3	3.46833	2.15656
3	3.46737	2.21078
3	3.4509	2.25156
3	3.45575	2.29222
3	3.4509	2.25156
3.1	3.35178	2.12634
3.1	3.36394	2.10011
3.1	3.3602	2.20516
3.1	3.37896	2.04753
3.1	3.40147	2.19204
3.1	3.35741	2.21828
3.1	3.34051	2.2314
3.1	3.33022	2.29699
3.2	3.25065	2.03458
3.2	3.25066	2.13615
3.2	3.25248	1.97094
3.2	3.2561	2.12354
3.2	3.22705	2.03448
3.2	3.20798	2.09813
3.2	3.22886	2.08542
3.3	3.14246	1.91111
3.3	3.17771	1.99747
3.3	3.16183	1.99747
3.3	3.17416	1.98515
3.3	3.18737	2.0098
3.3	3.15128	1.89879
3.3	3.16626	1.8002
3.3	3.14688	1.93586
3.4	3.09961	2.02255
3.4	3.12867	1.90275
3.4	3.0834	1.81902
3.4	3.07399	1.66353
3.4	3.09706	1.75922
3.4	3.08083	1.78314
3.4	3.06115	1.74725
3.4	3.05604	1.75922
3.5	2.99444	1.77867
3.5	3.01271	1.83686
3.5	3.02018	1.70895
3.5	3.00276	1.6741
3.5	2.97621	1.72057
3.5	3.00773	1.72057
3.5	2.99278	1.81352
3.5	2.95623	1.66248
3.6	2.904	1.67278
3.6	2.9153	1.5937
3.6	2.90722	1.54843
3.6	2.9024	1.63889
3.6	2.91775	1.62759
3.6	2.95	1.6163
3.6	2.92095	1.605
3.6	2.90483	1.63898
3.7	2.84203	1.55063
3.7	2.8648	1.51766
3.7	2.84907	1.55063
3.7	2.82001	1.56162
3.7	2.80037	1.5836
3.7	2.82159	1.53964
3.7	2.85301	1.52865
3.8	2.7657	1.46693
3.8	2.76339	1.42421
3.8	2.807	1.41342
3.8	2.80088	1.41351
3.8	2.77566	1.49912
3.8	2.78406	1.38132
3.8	2.79323	1.34921
3.8	2.81543	1.39202
3.9	2.72087	1.35632
3.9	2.70969	1.43983
3.9	2.74769	1.30427
3.9	2.741	1.33547
3.9	2.71191	1.27291
3.9	2.71491	1.41897
3.9	2.7015	1.35632
3.9	2.75218	1.36684
4	2.65793	1.33267
4	2.63611	1.27158
4	2.64702	1.31233
4	2.62815	1.32242
4	2.63977	1.40375
4	2.66663	1.353
4	2.66883	1.3225
4	2.67174	1.34283
4.1	2.5754	1.18098
4.1	2.57825	1.32992
4.1	2.54774	1.39935
4.1	2.57112	1.34976
4.1	2.60161	1.32
4.1	2.60445	1.31992
4.1	2.57326	1.25049
4.1	2.61366	1.31
4.2	2.52444	1.26913
4.2	2.5189	1.31762
4.2	2.50231	1.24008
4.2	2.53069	1.27881
4.2	2.55695	1.22071
4.2	2.51684	1.2304
4.2	2.50437	1.28849
4.2	2.51408	1.24976
4.3	2.47789	1.27752
4.3	2.461	1.14504
4.3	2.45898	1.23016
4.3	2.47656	1.21124
4.3	2.45965	1.18287
4.3	2.48669	1.24907
4.3	2.46845	1.32473
4.4	2.40772	1.19295
4.4	2.42819	1.29462
4.4	2.46254	1.19295
4.4	2.40375	1.15598
4.4	2.41894	1.18371
4.4	2.42025	1.31318
4.4	2.43413	1.22992
4.4	2.39582	1.22076
4.5	2.35485	1.25689
4.5	2.37939	1.16644
4.5	2.37423	1.18452
4.5	2.34388	1.25681
4.5	2.37617	1.14837
4.5	2.36132	1.27489
4.5	2.36648	1.1303
4.5	2.36195	1.24785
4.6	2.31818	1.22072
4.6	2.32641	1.22957
4.6	2.32517	1.26493
4.6	2.32957	1.14993
4.6	2.32198	1.13225
4.6	2.35231	1.20297
4.6	2.30935	1.23833
4.6	2.33463	1.25609
4.7	2.29113	1.18617
4.7	2.29729	1.22071
4.7	2.30722	1.16872
4.7	2.29299	1.16007
4.7	2.27443	1.22071
4.7	2.29546	1.19475
4.7	2.31215	1.14277
4.7	2.29421	1.16007
4.8	2.23552	1.20375
4.8	2.23187	1.08507
4.8	2.22828	1.16986
4.8	2.24401	1.10201
4.8	2.23857	1.16139
4.8	2.22585	1.22076
4.8	2.25794	1.22924
4.9	2.18398	1.22898
4.9	2.16262	1.13769
4.9	2.18397	1.21245
4.9	2.20296	1.15429
4.9	2.21068	1.22068
4.9	2.19404	1.24558
4.9	2.18278	1.20415
4.9	2.18871	1.12109
5	2.14319	1.237
5	2.1618	1.16373
5	2.1839	1.2614
5	2.17226	1.1638
5	2.16936	1.1882
5	2.16354	1.19627
5	2.1618	1.15567
5	2.16992	1.22887
5.1	2.13935	1.18876
5.1	2.11314	1.17281
5.1	2.12795	1.09307
5.1	2.1462	1.13294
5.1	2.10803	1.0851
5.1	2.11427	1.08503
5.1	2.11257	1.09301
5.1	2.13764	1.11699
5.2	2.09151	1.15026
5.2	2.08536	1.09551
5.2	2.06803	1.16596
5.2	2.10045	1.09551
5.2	2.08649	1.08769
5.2	2.08871	1.11904
5.2	2.08482	1.10333
5.2	2.09879	1.10333
5.3	2.0696	1.07484
5.3	2.04492	1.05182
5.3	2.04657	1.09786
5.3	2.0559	1.03648
5.3	2.08004	1.05182
5.3	2.05534	1.05182
5.3	2.03891	1.12855
5.4	2.00437	1.05488
5.4	2.00328	1.05494
5.4	2.00652	1.03235
5.4	2.01405	1.07
5.4	2.00759	1.05494
5.4	2.02373	1.04741
5.4	2.0205	1.03235
5.4	1.9936	0.964506
5.5	1.98217	0.969152
5.5	1.98799	0.969152
5.5	1.98587	0.94697
5.5	1.98377	0.954364
5.5	1.97584	1.00618
5.5	1.9769	0.939576
5.5	1.97796	1.07273
5.5	1.97848	0.954364
5.6	1.96858	0.966369
5.6	1.95925	0.980893
5.6	1.95146	1.01726
5.6	1.93227	0.901012
5.6	1.93745	1.01726
5.6	1.93796	0.973631
5.6	1.93952	0.995476
5.6	1.94886	0.951845
5.7	1.90091	0.95655
5.7	1.9157	0.935146
5.7	1.91009	0.920877
5.7	1.92029	0.977953
5.7	1.92232	0.977953
5.7	1.93201	1.02082
5.7	1.9269	0.949474
5.7	1.91009	0.885205
5.8	1.89219	0.897989
5.8	1.88518	0.862931
5.8	1.87565	0.890977
5.8	1.8942	0.905
5.8	1.90321	0.947069
5.8	1.88317	0.940115
5.8	1.89117	0.883966
5.8	1.90021	0.848908
5.9	1.87243	0.848305
5.9	1.83793	0.882768
5.9	1.85567	0.868983
5.9	1.85717	0.841412
5.9	1.84385	0.820678
5.9	1.85173	0.875876
5.9	1.87046	0.834463
6	1.81217	0.766333
6	1.83201	0.868056
6	1.82524	0.874889
6	1.82863	0.793444
6	1.8267	0.779889
6	1.83299	0.766278
6	1.82331	0.807056
6	1.82766	0.874889
6.1	1.8077	0.860492
6.1	1.79532	0.79377
6.1	1.79483	0.833825
6.1	1.8077	0.820492
6.1	1.80103	0.853825
6.1	1.78341	0.847158
6.1	1.80057	0.827158
6.1	1.78341	0.89388
6.2	1.75699	0.780968
6.2	1.7823	0.813817
6.2	1.7509	0.76129
6.2	1.77103	0.846667
6.2	1.77433	0.79414
6.2	1.76636	0.754677
6.2	1.75605	0.820376
6.2	1.75979	0.741613
6.3	1.748	0.716931
6.3	1.73785	0.736349
6.3	1.74661	0.781534
6.3	1.75309	0.800847
6.3	1.75401	0.81381
6.3	1.74846	0.800899
6.3	1.73694	0.762116
6.3	1.75446	0.716931
6.4	1.74067	0.693021
6.4	1.72887	0.79474
6.4	1.71298	0.731146
6.4	1.72205	0.781979
6.4	1.71116	0.801094
6.4	1.7157	0.788385
6.4	1.70844	0.673906
6.5	1.70093	0.707385
6.5	1.70228	0.763744
6.5	1.70227	0.757487
6.5	1.68796	0.707385
6.5	1.69333	0.726154
6.5	1.67947	0.751179
6.5	1.70228	0.707385
6.5	1.68663	0.795026
6.6	1.67693	0.78298
6.6	1.65577	0.807626
6.6	1.67472	0.721313
6.6	1.67516	0.739798
6.6	1.67956	0.74601
6.6	1.65404	0.826162
6.6	1.66281	0.807626
6.6	1.66723	0.826162
6.7	1.65971	0.795622
6.7	1.65579	0.734826
6.7	1.6406	0.771294
6.7	1.6649	0.765174
6.7	1.65622	0.789502
6.7	1.63238	0.819851
6.7	1.65406	0.728756
6.7	1.66882	0.728756
6.8	1.63359	0.718039
6.8	1.61777	0.73
6.8	1.61393	0.783922
6.8	1.62289	0.747941
6.8	1.62674	0.765882
6.8	1.61307	0.783873
6.8	1.63102	0.777892
6.8	1.63957	0.771961
6.9	1.61708	0.748889
6.9	1.60191	0.76657
6.9	1.60906	0.7843
6.9	1.6137	0.790242
6.9	1.59811	0.766618
6.9	1.60021	0.802029
6.9	1.61665	0.7843
7	1.57735	0.837095
7	1.59647	0.802238
7	1.56824	0.744
7	1.58691	0.732429
7	1.57654	0.80219
7	1.56532	0.726619
7	1.57154	0.778905
7	1.58068	0.825429
7.1	1.5437	0.853897
7.1	1.56579	0.802394
7.1	1.55883	0.813756
7.1	1.56089	0.779437
7.1	1.5756	0.790892
7.1	1.57439	0.836761
7.1	1.58421	0.81385
7.1	1.58747	0.790845
7.2	1.54485	0.768565
7.2	1.54323	0.779907
7.2	1.55251	0.859028
7.2	1.55695	0.870324
7.2	1.56181	0.842083
7.2	1.5723	0.762963
7.2	1.54768	0.779907
7.2	1.55252	0.813843
7.3	1.5197	0.797078
7.3	1.53006	0.791553
7.3	1.52726	0.797123
7.3	1.51771	0.802648
7.3	1.51732	0.785936
7.3	1.52767	0.791553
7.3	1.51414	0.841689
7.3	1.51612	0.836073
7.4	1.50272	0.753333
7.4	1.52077	0.813829
7.4	1.52274	0.819324
7.4	1.49837	0.835811
7.4	1.50428	0.808333
7.4	1.51135	0.808333
7.4	1.52823	0.841306
7.4	1.53295	0.868784
7.5	1.49586	0.824622
7.5	1.48731	0.792133
7.5	1.48888	0.781244
7.5	1.48499	0.808356
7.5	1.49313	0.830089
7.5	1.49314	0.824667
7.5	1.49081	0.840933
7.6	1.47348	0.84057
7.6	1.47502	0.829912
7.6	1.4949	0.851272
7.6	1.48037	0.867325
7.6	1.49145	0.803114
7.6	1.48839	0.835219
7.6	1.4735	0.803114
7.6	1.47998	0.808465
7.7	1.46794	0.824416
7.7	1.4785	0.834978
7.7	1.47397	0.834935
7.7	1.46039	0.856061
7.7	1.46341	0.877229
7.7	1.46378	0.797922
7.7	1.46682	0.845498
7.7	1.45926	0.834978
7.8	1.45247	0.808632
7.8	1.43645	0.834701
7.8	1.43906	0.803376
7.8	1.44837	0.824231
7.8	1.43905	0.772094
7.8	1.42826	0.871197
7.8	1.43607	0.813803
7.8	1.44168	0.850299
7.9	1.43556	0.829241
7.9	1.41128	0.834388
7.9	1.41274	0.83443
7.9	1.4157	0.865316
7.9	1.42563	0.849873
7.9	1.44291	0.834388
7.9	1.42819	0.803502
7.9	1.4341	0.844726
8	1.41762	0.783292
8	1.41543	0.818917
8	1.41071	0.8545
8	1.40271	0.778167
8	1.41434	0.824
8	1.4158	0.829083
8	1.40744	0.793417
8.1	1.39508	0.708313
8.1	1.41304	0.798724
8.1	1.3976	0.818848
8.1	1.39508	0.723374
8.1	1.38433	0.76358
8.1	1.39868	0.798724
8.1	1.41375	0.753539
8.1	1.39832	0.793745
8.2	1.39755	0.729431
8.2	1.38232	0.798902
8.2	1.38161	0.779065
8.2	1.37985	0.754268
8.2	1.39155	0.789024
8.2	1.38976	0.81878
8.2	1.38268	0.853496
8.2	1.40537	0.774106
8.3	1.38458	0.818715
8.3	1.37198	0.794217
8.3	1.36322	0.774618
8.3	1.35902	0.75498
8.3	1.37198	0.813815
8.3	1.37338	0.784418
8.3	1.36182	0.720643
8.3	1.37933	0.808916
8.4	1.35599	0.750833
8.4	1.34734	0.81381
8.4	1.35876	0.745992
8.4	1.35806	0.818651
8.4	1.3546	0.755675
8.4	1.36292	0.712063
8.4	1.3591	0.77504
8.4	1.35115	0.794444
8.5	1.34037	0.785098
8.5	1.34414	0.775529
8.5	1.35099	0.785098
8.5	1.34892	0.746784
8.5	1.3479	0.794667
8.5	1.34345	0.746784
8.5	1.35064	0.770745
8.6	1.32378	0.728682
8.6	1.33696	0.757016
8.6	1.3214	0.738101
8.6	1.31161	0.704961
8.6	1.32512	0.738101
8.6	1.33121	0.77124
8.6	1.33087	0.775969
8.6	1.32378	0.747558
8.7	1.32259	0.753027
8.7	1.3109	0.79977
8.7	1.30622	0.743678
8.7	1.31926	0.795096
8.7	1.30656	0.74364
8.7	1.31658	0.752989
8.7	1.31825	0.795096
8.7	1.32025	0.776398
8.8	1.29732	0.758333
8.8	1.297	0.679697
8.8	1.3145	0.767576
8.8	1.31417	0.721326
8.8	1.296	0.684318
8.8	1.30393	0.712121
8.8	1.30823	0.725947
8.8	1.31682	0.74447
8.9	1.2994	0.736105
8.9	1.30136	0.726966
8.9	1.29255	0.704082
8.9	1.28537	0.708652
8.9	1.27751	0.713221
8.9	1.28112	0.713221
8.9	1.28961	0.736105
8.9	1.28242	0.717828
9	1.26819	0.732444
9	1.26591	0.660111
9	1.27754	0.705296
9	1.26688	0.67363
9	1.2685	0.741481
9	1.27915	0.678185
9	1.28077	0.700815
9	1.27496	0.687222
9.1	1.26318	0.652857
9.1	1.26765	0.67967
9.1	1.26701	0.728828
9.1	1.25679	0.697582
9.1	1.26158	0.693077
9.1	1.26222	0.661795
9.1	1.26606	0.675165
9.2	1.25198	0.685543
9.2	1.25451	0.69442
9.2	1.2564	0.738623
9.2	1.25641	0.720942
9.2	1.25388	0.716486
9.2	1.25513	0.698804
9.2	1.27851	0.725362
9.2	1.2583	0.703261
9.3	1.25945	0.730645
9.3	1.25196	0.69129
9.3	1.25227	0.682545
9.3	1.24414	0.678208
9.3	1.24914	0.660681
9.3	1.2557	0.695699
9.3	1.26133	0.686918
9.3	1.25289	0.700036
9.4	1.22379	0.744539
9.4	1.2445	0.692589
9.4	1.2374	0.714255
9.4	1.22936	0.619007
9.4	1.22162	0.696915
9.4	1.22038	0.748865
9.4	1.23771	0.675284
9.4	1.22132	0.683901
9.5	1.19776	0.663895
9.5	1.20846	0.706737
9.5	1.21826	0.681018
9.5	1.21428	0.659614
9.5	1.21733	0.672456
9.5	1.21428	0.668175
9.5	1.21672	0.668175
9.5	1.21886	0.638175
9.6	1.21344	0.656979
9.6	1.19709	0.682396
9.6	1.19678	0.695104
9.6	1.21253	0.614583
9.6	1.20314	0.618819
9.6	1.19951	0.652743
9.6	1.18467	0.695139
9.7	1.19074	0.658591
9.7	1.19462	0.650206
9.7	1.19943	0.633436
9.7	1.19014	0.633436
9.7	1.19943	0.654399
9.7	1.19404	0.641787
9.7	1.19223	0.666976
9.7	1.20003	0.725704
9.8	1.18719	0.685068
9.8	1.20291	0.61034
9.8	1.1946	0.60619
9.8	1.19014	0.631122
9.8	1.19549	0.626973
9.8	1.18956	0.651871
9.8	1.18245	0.643605
9.8	1.20379	0.66432
9.9	1.17489	0.637071
9.9	1.15641	0.62064
9.9	1.16728	0.661717
9.9	1.17961	0.665825
9.9	1.16933	0.678148
9.9	1.17784	0.624714
9.9	1.16052	0.583636
9.9	1.16169	0.624747
10	1.15764	0.6714
10	1.15676	0.675433
10	1.15821	0.6551
10	1.1553	0.6429
10	1.16867	0.663233
10	1.16868	0.646967
10	1.16606	0.594067
10	1.16577	0.602233
10.1	1.15249	0.660726
10.1	1.14042	0.616403
10.1	1.15538	0.612409
10.1	1.15739	0.628482
10.1	1.16401	0.648614
10.1	1.16114	0.640561
10.1	1.1594	0.628449
10.2	1.13749	0.67817
10.2	1.1375	0.626307
10.2	1.13836	0.554477
10.2	1.14347	0.614314
10.2	1.13977	0.594379
10.2	1.14321	0.614346
10.2	1.13236	0.698105
10.2	1.13351	0.610359
10.3	1.12815	0.659741
10.3	1.14028	0.580744
10.3	1.1352	0.620227
10.3	1.12984	0.647864
10.3	1.13519	0.663689
10.3	1.14536	0.679515
10.3	1.13464	0.643948
10.3	1.12589	0.655761
10.4	1.1187	0.622083
10.4	1.13211	0.626026
10.4	1.13575	0.653397
10.4	1.12792	0.672917
10.4	1.13351	0.657308
10.4	1.12652	0.641635
10.4	1.13602	0.606442
10.4	1.12093	0.629904
10.5	1.11551	0.620032
10.5	1.12216	0.620032
10.5	1.11191	0.666508
10.5	1.11995	0.64327
10.5	1.11302	0.643302
10.5	1.12354	0.678159
10.5	1.12603	0.635524
10.5	1.11995	0.658794
10.6	1.10499	0.644906
10.6	1.10198	0.618019
10.6	1.11569	0.641101
10.6	1.11047	0.621887
10.6	1.1102	0.641069
10.6	1.09978	0.637201
10.6	1.10829	0.648742
10.6	1.10553	0.667925
10.7	1.10037	0.654081
10.7	1.10227	0.578037
10.7	1.09602	0.631246
10.7	1.0982	0.64271
10.7	1.10743	0.616044
10.7	1.09412	0.661713
10.7	1.08733	0.631277
10.8	1.08722	0.606574
10.8	1.08588	0.670617
10.8	1.08669	0.689475
10.8	1.09396	0.651821
10.8	1.08694	0.674414
10.8	1.10418	0.659352
10.8	1.08857	0.640494
10.8	1.08803	0.655586
10.9	1.07858	0.657003
10.9	1.08658	0.660765
10.9	1.08204	0.64581
10.9	1.07885	0.660765
10.9	1.07751	0.68315
10.9	1.08071	0.638318
10.9	1.09672	0.668226
10.9	1.07512	0.645841
11	1.0656	0.636242
11	1.0767	0.647364
11	1.08172	0.636242
11	1.0693	0.65103
11	1.07194	0.669545
11	1.0796	0.662152
11	1.07828	0.676939
11	1.0767	0.628848
11.1	1.0691	0.612192
11.1	1.07119	0.623183
11.1	1.06726	0.626847
11.1	1.06804	0.623183
11.1	1.06097	0.619489
11.1	1.06491	0.623213
11.1	1.07066	0.630511
11.1	1.06752	0.626847
11.2	1.05384	0.635774
11.2	1.0528	0.577649
11.2	1.05903	0.592202
11.2	1.05981	0.606726
11.2	1.05669	0.650327
11.2	1.0528	0.646696
11.2	1.06085	0.58128
11.3	1.05198	0.601357
11.3	1.04889	0.619351
11.3	1.04425	0.655369
11.3	1.04734	0.655369
11.3	1.04297	0.615752
11.3	1.05223	0.637375
11.3	1.05274	0.65174
11.3	1.04194	0.633746
11.4	1.03459	0.588947
11.4	1.04784	0.592515
11.4	1.04886	0.621053
11.4	1.04223	0.599649
11.4	1.04963	0.592515
11.4	1.04759	0.631754
11.4	1.03841	0.62462
11.4	1.04122	0.610351
11.5	1.03318	0.587362
11.5	1.0362	0.566116
11.5	1.04329	0.597971
11.5	1.0304	0.590899
11.5	1.04304	0.605072
11.5	1.02863	0.580261
11.5	1.03267	0.590899
11.5	1.04177	0.651043
11.6	1.03053	0.603333
11.6	1.0185	0.599828
11.6	1.02352	0.631408
11.6	1.01726	0.631408
11.6	1.01951	0.627902
11.6	1.03228	0.578793
11.6	1.03178	0.596322
11.6	1.03604	0.599828
11.7	1.02818	0.629487
11.7	1.02918	0.615584
11.7	1.01228	0.605157
11.7	1.02818	0.601652
11.7	1.03291	0.612108
11.7	1.02743	0.608604
11.7	1.01949	0.584274
11.8	1.00839	0.596554
11.8	1.01233	0.596554
11.8	1.02218	0.600028
11.8	1.01085	0.603475
11.8	1.01799	0.620706
11.8	1.01947	0.600028
11.8	1.01084	0.562062
11.8	1.00592	0.603446
11.9	0.997705	0.571036
11.9	1.00358	0.615462
11.9	1.00846	0.571036
11.9	1.01359	0.557367
11.9	1.01334	0.557367
11.9	1.00943	0.605238
11.9	1.01335	0.540252
11.9	1.00748	0.588151
12	0.998849	0.576444
12	0.996913	0.545917
12	0.997873	0.573056
12	0.992304	0.539139
12	0.999569	0.549333
12	0.990845	0.562861
12	0.996423	0.549306
12	1.00344	0.573056
12.1	0.996122	0.56832
12.1	0.992029	0.588512
12.1	0.985061	0.548154
12.1	0.993233	0.605317
12.1	0.990346	0.534683
12.1	0.991555	0.588512
12.1	0.994675	0.551515
12.1	0.992993	0.527961
12.2	0.99176	0.553661
12.2	0.992951	0.567022
12.2	0.994145	0.536967
12.2	0.986998	0.580355
12.2	0.989858	0.563661
12.2	0.980568	0.520301
12.2	0.991048	0.553661
12.2	0.991526	0.556995
12.3	0.976609	0.535935
12.3	0.981812	0.552466
12.3	0.98181	0.552466
12.3	0.990554	0.539241
12.3	0.97283	0.54916
12.3	0.980859	0.552466
12.3	0.986535	0.562412
12.4	0.972485	0.570995
12.4	0.97717	0.538172
12.4	0.971077	0.60379
12.4	0.966857	0.570995
12.4	0.96405	0.551317
12.4	0.971776	0.55457
12.4	0.968032	0.570968
12.4	0.973185	0.593952
12.5	0.959819	0.572933
12.5	0.972375	0.556667
12.5	0.978657	0.563173
12.5	0.963305	0.605467
12.5	0.970053	0.57944
12.5	0.962611	0.5892
12.5	0.964004	0.615227
12.5	0.964004	0.572907
12.6	0.953356	0.568386
12.6	0.959813	0.558677
12.6	0.958428	0.539339
12.6	0.946897	0.549021
12.6	0.94828	0.590979
12.6	0.958664	0.571614
12.6	0.955659	0.587751
12.6	0.958902	0.565159
12.7	0.947458	0.557507
12.7	0.962334	0.589528
12.7	0.952943	0.583097
12.7	0.955697	0.618346
12.7	0.950883	0.547874
12.7	0.963016	0.586299
12.7	0.96851	0.567087
12.7	0.962555	0.567113
12.8	0.951631	0.549948
12.8	0.946408	0.594453
12.8	0.937777	0.575365
12.8	0.939596	0.540417
12.8	0.947096	0.534062
12.8	0.946633	0.594453
12.8	0.950724	0.597656
12.9	0.93119	0.574057
12.9	0.945829	0.574057
12.9	0.940423	0.615065
12.9	0.94065	0.602455
12.9	0.93952	0.58354
12.9	0.94876	0.57093
12.9	0.944249	0.592997
12.9	0.937495	0.605607
13	0.953533	0.610359
13	0.936317	0.597846
13	0.934526	0.600949
13	0.937652	0.585308
13	0.937434	0.591564
13	0.936099	0.607205
13	0.939007	0.597821
13	0.930505	0.600949
13.1	0.932721	0.593257
13.1	0.921625	0.602595
13.1	0.927623	0.605674
13.1	0.919407	0.624326
13.1	0.924955	0.590153
13.1	0.926514	0.583919
13.1	0.921187	0.590153
13.1	0.924066	0.615038
13.2	0.909356	0.625783
13.2	0.913544	0.641187
13.2	0.924998	0.601111
13.2	0.914867	0.622677
13.2	0.917289	0.635025
13.2	0.921472	0.641187
13.2	0.931382	0.607247
13.2	0.934461	0.619571
13.3	0.911267	0.642481
13.3	0.904495	0.630226
13.3	0.923502	0.590451
13.3	0.917383	0.605764
13.3	0.921097	0.621053
13.3	0.928749	0.61797
13.3	0.914325	0.621028
13.4	0.919645	0.613383
13.4	0.912706	0.604254
13.4	0.910107	0.610348
13.4	0.915096	0.637687
13.4	0.913575	0.619453
13.4	0.906631	0.640721
13.4	0.914435	0.622488
13.4	0.914446	0.643756
13.5	0.900134	0.638988
13.5	0.910035	0.629951
13.5	0.904661	0.623926
13.5	0.900132	0.626938
13.5	0.910252	0.587753
13.5	0.90724	0.602815
13.5	0.905307	0.599802
13.5	0.897767	0.629951
13.6	0.898001	0.619338
13.6	0.893515	0.625319
13.6	0.903346	0.616348
13.6	0.902712	0.592377
13.6	0.899498	0.583407
13.6	0.895867	0.622328
13.6	0.899706	0.583431
13.6	0.891378	0.607353
13.7	0.881044	0.614793
13.7	0.887423	0.588078
13.7	0.890808	0.599951
13.7	0.893361	0.608881
13.7	0.887205	0.614818
13.7	0.891875	0.605912
13.7	0.891449	0.629659
13.7	0.90248	0.608856
13.8	0.889615	0.598551
13.8	0.888361	0.607391
13.8	0.887729	0.607391
13.8	0.88815	0.610362
13.8	0.887731	0.62215
13.8	0.896361	0.592633
13.8	0.894677	0.619203
13.8	0.885618	0.592657
13.9	0.888866	0.579616
13.9	0.886151	0.600096
13.9	0.879041	0.603022
13.9	0.885522	0.60012
13.9	0.887403	0.629376
13.9	0.887614	0.61765
13.9	0.878407	0.638177
14	0.879821	0.598714
14	0.878162	0.636524
14	0.879815	0.621976
14	0.877738	0.6365
14	0.880024	0.566762
14	0.878779	0.572571
14	0.887293	0.58419
14	0.88085	0.59581
14.1	0.865949	0.617589
14.1	0.86987	0.600236
14.1	0.877496	0.577163
14.1	0.880377	0.591584
14.1	0.88079	0.55409
14.1	0.879965	0.597376
14.1	0.884301	0.582931
14.1	0.880588	0.594492
14.2	0.868246	0.590305
14.2	0.867227	0.58169
14.2	0.860471	0.575962
14.2	0.867835	0.596009
14.2	0.850637	0.607488
14.2	0.863129	0.590305
14.2	0.863949	0.607465
14.2	0.866611	0.578826
14.3	0.865425	0.589021
14.3	0.864004	0.586177
14.3	0.869496	0.56627
14.3	0.86299	0.574779
14.3	0.855466	0.560559
14.3	0.862987	0.623147
14.3	0.866647	0.597552
14.3	0.859529	0.606084
14.4	0.858003	0.579259
14.4	0.855584	0.579282
14.4	0.860217	0.559491
14.4	0.85477	0.596227
14.4	0.858408	0.576435
14.4	0.862237	0.599051
14.4	0.859013	0.576435
14.5	0.849481	0.59492
14.5	0.851887	0.580897
14.5	0.855095	0.575287
14.5	0.849483	0.575287
14.5	0.862315	0.578092
14.5	0.862507	0.561241
14.5	0.862703	0.550023
14.5	0.856901	0.544391
14.6	0.858397	0.546256
14.6	0.856005	0.540685
14.6	0.844258	0.582489
14.6	0.854017	0.546256
14.6	0.851425	0.565776
14.6	0.860385	0.532306
14.6	0.855011	0.540662
14.6	0.85342	0.526735
14.7	0.853149	0.528685
14.7	0.853147	0.523152
14.7	0.847418	0.539773
14.7	0.840099	0.537007
14.7	0.849187	0.548073
14.7	0.852357	0.517596
14.7	0.848405	0.528685
14.7	0.845836	0.553628
14.8	0.840706	0.566374
14.8	0.846208	0.525113
14.8	0.84856	0.508604
14.8	0.845421	0.503108
14.8	0.841295	0.536126
14.8	0.846208	0.536126
14.8	0.850135	0.541622
14.8	0.847188	0.527883
14.9	0.840527	0.535257
14.9	0.834872	0.51613
14.9	0.834088	0.524318
14.9	0.831747	0.529799
14.9	0.835652	0.546174
14.9	0.831943	0.543468
14.9	0.830775	0.568031
15	0.824844	0.534422
15	0.836667	0.531689
15	0.835116	0.531689
15	0.833568	0.542533
15	0.838992	0.575089
15	0.841895	0.558822
15	0.837443	0.523556
15	0.828144	0.528978
15.1	0.836706	0.57128
15.1	0.824003	0.536247
15.1	0.833627	0.552428
15.1	0.836318	0.549735
15.1	0.836132	0.533576
15.1	0.838441	0.533532
15.1	0.827269	0.53894
15.1	0.833436	0.544349
15.2	0.825847	0.535417
15.2	0.827376	0.543443
15.2	0.825655	0.535417
15.2	0.828524	0.530044
15.2	0.829286	0.527368
15.2	0.829673	0.546096
15.2	0.836942	0.524693
15.2	0.831776	0.540746
15.3	0.825198	0.5239
15.3	0.817599	0.51061
15.3	0.822919	0.52658
15.3	0.825391	0.529237
15.3	0.826909	0.531917
15.3	0.82577	0.553159
15.3	0.821399	0.550523
15.3	0.828617	0.537233
15.4	0.820598	0.515238
15.4	0.827387	0.525801
15.4	0.819841	0.528463
15.4	0.818143	0.533723
15.4	0.819649	0.536385
15.4	0.820028	0.509957
15.4	0.81342	0.51526
15.4	0.809651	0.536364
15.5	0.804235	0.559161
15.5	0.818112	0.53028
15.5	0.822054	0.540796
15.5	0.820925	0.546022
15.5	0.818303	0.527656
15.5	0.812868	0.553914
15.5	0.82524	0.55129
15.6	0.805235	0.566004
15.6	0.809702	0.54515
15.6	0.817155	0.529509
15.6	0.815661	0.547735
15.6	0.811006	0.534722
15.6	0.813054	0.547756
15.6	0.812869	0.534722
15.6	0.814361	0.550363
15.7	0.816206	0.536497
15.7	0.802137	0.520934
15.7	0.806767	0.515775
15.7	0.813805	0.541677
15.7	0.811394	0.554628
15.7	0.81843	0.546858
15.7	0.807134	0.544268
15.7	0.81658	0.520934
15.8	0.805336	0.553713
15.8	0.804051	0.530506
15.8	0.798716	0.564008
15.8	0.80442	0.543418
15.8	0.808287	0.538228
15.8	0.810677	0.548565
15.8	0.799454	0.538228
15.8	0.801849	0.543397
15.9	0.800641	0.524633
15.9	0.798444	0.529727
15.9	0.804299	0.542537
15.9	0.804298	0.537421
15.9	0.801373	0.506688
15.9	0.796074	0.522055
15.9	0.795705	0.537421
15.9	0.7926	0.529748
16	0.789098	0.534042
16	0.790731	0.518792
16	0.798542	0.511167
16	0.794366	0.51625
16	0.785826	0.539146
16	0.796177	0.572208
16	0.785283	0.556958
16.1	0.797013	0.535797
16.1	0.793222	0.548447
16.1	0.788889	0.528219
16.1	0.782029	0.533251
16.1	0.795387	0.545921
16.1	0.795935	0.535818
16.1	0.790874	0.543395
16.1	0.785822	0.538323
16.2	0.78312	0.565144
16.2	0.793524	0.535
16.2	0.782942	0.529979
16.2	0.785636	0.540021
16.2	0.784555	0.552593
16.2	0.785459	0.535
16.2	0.787612	0.512387
16.2	0.783839	0.524959
16.3	0.785628	0.519243
16.3	0.782245	0.549202
16.3	0.779568	0.549202
16.3	0.781529	0.536728
16.3	0.780459	0.534233
16.3	0.780635	0.529223
16.3	0.78313	0.549202
16.3	0.786519	0.534233
16.4	0.775703	0.523516
16.4	0.772507	0.533435
16.4	0.77446	0.521037
16.4	0.783319	0.506138
16.4	0.778181	0.525996
16.4	0.785624	0.525996
16.4	0.780482	0.533455
16.4	0.781193	0.503638
16.5	0.77487	0.520343
16.5	0.777517	0.515394
16.5	0.770646	0.517879
16.5	0.771175	0.505535
16.5	0.776457	0.549939
16.5	0.768358	0.542545
16.5	0.780684	0.522808
16.6	0.764254	0.544177
16.6	0.767051	0.527028
16.6	0.7618	0.558876
16.6	0.768277	0.541727
16.6	0.775281	0.527008
16.6	0.77213	0.546627
16.6	0.770555	0.553976
16.6	0.776162	0.524558
16.7	0.773255	0.531158
16.7	0.766985	0.528723
16.7	0.767334	0.538483
16.7	0.763157	0.557964
16.7	0.762633	0.526287
16.7	0.768899	0.523852
16.7	0.764371	0.536028
16.7	0.76142	0.543333
16.8	0.765188	0.549782
16.8	0.756022	0.54254
16.8	0.758791	0.537698
16.8	0.760173	0.535278
16.8	0.76605	0.54254
16.8	0.755496	0.527996
16.8	0.760519	0.520734
16.8	0.760342	0.540119
16.9	0.755671	0.527298
16.9	0.752236	0.536903
16.9	0.754987	0.522465
16.9	0.757566	0.541736
16.9	0.76376	0.544142
16.9	0.760834	0.529684
16.9	0.769088	0.532091
16.9	0.766848	0.536923
17	0.756866	0.548118
17	0.75601	0.512216
17	0.753113	0.524176
17	0.758922	0.52898
17	0.754821	0.531353
17	0.756188	0.507431
17	0.750031	0.524176
17	0.749352	0.533745
17.1	0.747005	0.525867
17.1	0.739527	0.513977
17.1	0.743262	0.523489
17.1	0.748875	0.504464
17.1	0.746495	0.499708
17.1	0.749383	0.530643
17.1	0.753292	0.521111
17.2	0.745195	0.50626
17.2	0.751112	0.513353
17.2	0.749421	0.499167
17.2	0.748916	0.510988
17.2	0.747395	0.508624
17.2	0.748063	0.525194
17.2	0.75128	0.503895
17.2	0.745532	0.518081
17.3	0.73568	0.510385
17.3	0.732658	0.508054
17.3	0.741226	0.517437
17.3	0.742234	0.512736
17.3	0.744251	0.536262
17.3	0.740216	0.510385
17.3	0.741224	0.524509
17.3	0.736522	0.505684
17.4	0.735965	0.493429
17.4	0.74465	0.498103
17.4	0.738804	0.528487
17.4	0.742478	0.509789
17.4	0.743316	0.505134
17.4	0.740473	0.502778
17.4	0.743311	0.491092
17.4	0.746485	0.526169
17.5	0.739562	0.5092
17.5	0.734912	0.506895
17.5	0.734578	0.502229
17.5	0.736407	0.497581
17.5	0.736905	0.520838
17.5	0.735412	0.488286
17.5	0.742053	0.497581
17.5	0.737735	0.481295
17.6	0.729744	0.504015
17.6	0.72661	0.492443
17.6	0.729742	0.457746
17.6	0.735027	0.483182
17.6	0.74081	0.492462
17.6	0.735852	0.487822
17.6	0.733874	0.503996
17.7	0.720858	0.487363
17.7	0.732027	0.466667
17.7	0.733832	0.489661
17.7	0.732525	0.480471
17.7	0.731532	0.46435
17.7	0.728083	0.473559
17.7	0.73662	0.491977
17.7	0.727429	0.473559
17.8	0.734119	0.477772
17.8	0.729223	0.48236
17.8	0.723995	0.491479
17.8	0.728242	0.475487
17.8	0.726608	0.475468
17.8	0.729874	0.484644
17.8	0.723993	0.48236
17.8	0.730202	0.452603
17.9	0.731157	0.456909
17.9	0.723849	0.477393
17.9	0.723851	0.450093
17.9	0.719135	0.465996
17.9	0.729205	0.456909
17.9	0.727417	0.47054
17.9	0.724013	0.47054
17.9	0.726125	0.463743
18	0.726442	0.440796
18	0.719344	0.461148
18	0.723861	0.463407
18	0.716272	0.45663
18	0.728545	0.470185
18	0.727417	0.474722
18	0.723056	0.452111
18	0.72709	0.443056
18.1	0.716976	0.442855
18.1	0.718582	0.47884
18.1	0.720347	0.472099
18.1	0.722757	0.4586
18.1	0.719868	0.44512
18.1	0.716492	0.447348
18.1	0.713602	0.442873
18.2	0.711597	0.44044
18.2	0.713516	0.45163
18.2	0.716864	0.460549
18.2	0.717826	0.442674
18.2	0.711918	0.444908
18.2	0.724372	0.42478
18.2	0.715908	0.458315
18.2	0.715593	0.47174
18.3	0.708505	0.453607
18.3	0.718189	0.455811
18.3	0.712475	0.460273
18.3	0.717394	0.449144
18.3	0.716288	0.455811
18.3	0.715803	0.455811
18.3	0.718825	0.453607
18.3	0.713111	0.455829
18.4	0.710499	0.448913
18.4	0.710973	0.437844
18.4	0.703703	0.431214
18.4	0.709554	0.451123
18.4	0.708447	0.459964
18.4	0.706234	0.482083
18.4	0.71334	0.464402
18.4	0.712869	0.446703
18.5	0.703834	0.444288
18.5	0.706026	0.450883
18.5	0.705239	0.448685
18.5	0.717817	0.455279
18.5	0.710425	0.461892
18.5	0.707125	0.470685
18.5	0.704927	0.439874
18.5	0.709952	0.422306
18.6	0.709267	0.433136
18.6	0.704884	0.439713
18.6	0.708324	0.428781
18.6	0.711919	0.468154
18.6	0.705513	0.437527
18.6	0.704575	0.43095
18.6	0.702074	0.4419
18.6	0.710045	0.463763
18.7	0.705937	0.441711
18.7	0.710751	0.448253
18.7	0.709822	0.461301
18.7	0.704231	0.448253
18.7	0.708733	0.446061
18.7	0.704691	0.463494
18.7	0.707021	0.463476
18.8	0.701716	0.456684
18.8	0.704505	0.448032
18.8	0.700324	0.465337
18.8	0.697852	0.422039
18.8	0.698783	0.478333
18.8	0.707904	0.454504
18.8	0.706044	0.461011
18.8	0.703728	0.456684
18.9	0.700777	0.477937
18.9	0.701847	0.449965
18.9	0.698932	0.454268
18.9	0.696774	0.482257
18.9	0.694009	0.454268
18.9	0.698157	0.441358
18.9	0.694928	0.45642
18.9	0.694625	0.443492
19	0.692346	0.439018
19	0.694028	0.451877
19	0.699073	0.464737
19	0.690055	0.460439
19	0.690511	0.439035
19	0.698925	0.443298
19	0.695556	0.441158
19	0.700454	0.46686
19.1	0.692064	0.438866
19.1	0.696478	0.43459
19.1	0.690849	0.438866
19.1	0.693894	0.43459
19.1	0.692221	0.434607
19.1	0.69602	0.447382
19.1	0.687953	0.458028
19.1	0.688413	0.423944
19.2	0.686949	0.440799
19.2	0.689676	0.466233
19.2	0.691487	0.470469
19.2	0.688769	0.440816
19.2	0.692096	0.442934
19.2	0.68831	0.459878
19.2	0.695425	0.438698
19.3	0.68414	0.432193
19.3	0.682486	0.444853
19.3	0.683089	0.44696
19.3	0.693175	0.472245
19.3	0.696491	0.442746
19.3	0.691823	0.442746
19.3	0.69619	0.425872
19.3	0.690016	0.453282
19.4	0.688553	0.459347
19.4	0.685557	0.453041
19.4	0.690804	0.465636
19.4	0.688554	0.467715
19.4	0.688104	0.448849
19.4	0.687656	0.444656
19.4	0.685858	0.459347
19.4	0.678821	0.467732
19.5	0.677424	0.454889
19.5	0.682491	0.42359
19.5	0.681444	0.440291
19.5	0.677424	0.434017
19.5	0.678167	0.419419
19.5	0.686519	0.450718
19.5	0.67921	0.461162
19.5	0.681889	0.448632
19.6	0.684492	0.448418
19.6	0.683456	0.450493
19.6	0.680046	0.435969
19.6	0.68079	0.444269
19.6	0.678122	0.45881
19.6	0.681829	0.460884
19.6	0.681381	0.452568
19.6	0.679747	0.444269
19.7	0.678367	0.442014
19.7	0.680723	0.446159
19.7	0.683084	0.458545
19.7	0.674969	0.442014
19.7	0.678362	0.448206
19.7	0.682052	0.439949
19.7	0.678807	0.433756
19.8	0.676112	0.452104
19.8	0.676994	0.439781
19.8	0.674794	0.44596
19.8	0.675234	0.441852
19.8	0.678316	0.427441
19.8	0.677869	0.435673
19.8	0.675818	0.419226
19.8	0.682868	0.435673
19.9	0.676077	0.437571
19.9	0.673597	0.451876
19.9	0.672714	0.421206
19.9	0.679432	0.419179
19.9	0.676369	0.431441
19.9	0.675343	0.443702
19.9	0.668331	0.451876
19.9	0.670666	0.437571
20	0.667315	0.449617
20	0.664849	0.449617
20	0.668045	0.431317
20	0.669205	0.451667
20	0.665431	0.457767
20	0.662377	0.42725
20	0.668629	0.455733
20	0.666883	0.467933
20.1	0.665299	0.43524
20.1	0.668769	0.439287
20.1	0.666456	0.459536
20.1	0.661105	0.451443
20.1	0.661249	0.457496
20.1	0.662843	0.439287
20.1	0.664144	0.429171
20.1	0.666742	0.429171
20.2	0.662865	0.439125
20.2	0.66416	0.443152
20.2	0.663155	0.433086
20.2	0.660992	0.437112
20.2	0.66172	0.41698
20.2	0.660565	0.435099
20.2	0.669485	0.437096
20.2	0.665605	0.449208
20.3	0.661322	0.430952
20.3	0.666332	0.426946
20.3	0.666332	0.424926
20.3	0.664041	0.432956
20.3	0.659601	0.436962
20.3	0.656744	0.422923
20.3	0.663905	0.422939
20.4	0.658221	0.444804
20.4	0.653092	0.410882
20.4	0.656511	0.42085
20.4	0.664492	0.444804
20.4	0.661071	0.42884
20.4	0.658794	0.446797
20.4	0.656513	0.454771
20.4	0.661069	0.436814
20.5	0.652175	0.430715
20.5	0.662243	0.446602
20.5	0.656145	0.444618
20.5	0.655296	0.454537
20.5	0.656998	0.436667
20.5	0.656575	0.440634
20.5	0.658129	0.458504
20.5	0.657559	0.470423
20.6	0.653948	0.452346
20.6	0.649293	0.45432
20.6	0.648584	0.470097
20.6	0.652536	0.456278
20.6	0.655496	0.446408
20.6	0.655216	0.428641
20.6	0.655641	0.464191
20.6	0.650277	0.45432
20.7	0.643907	0.438357
20.7	0.647137	0.444251
20.7	0.65149	0.450161
20.7	0.648257	0.436393
20.7	0.651347	0.430483
20.7	0.651771	0.469807
20.7	0.651066	0.456055
20.7	0.64826	0.44818
20.8	0.644166	0.44016
20.8	0.654644	0.446026
20.8	0.654225	0.451907
20.8	0.646819	0.447997
20.8	0.645705	0.434279
20.8	0.643607	0.444087
20.8	0.654089	0.461683
20.9	0.646227	0.418581
20.9	0.640668	0.451691
20.9	0.648312	0.461419
20.9	0.653322	0.465311
20.9	0.645811	0.451691
20.9	0.641782	0.428325
20.9	0.643168	0.457512
20.9	0.648456	0.47504
21	0.650627	0.451476
21	0.643846	0.445667
21	0.645781	0.453413
21	0.64744	0.463095
21	0.64592	0.44954
21	0.644536	0.432095
21	0.649933	0.426286
21	0.645227	0.44954
21.1	0.636248	0.447409
21.1	0.632533	0.4397
21.1	0.643277	0.451248
21.1	0.644511	0.441627
21.1	0.645063	0.4609
21.1	0.645474	0.453191
21.1	0.641895	0.453191
21.1	0.642444	0.445466
21.2	0.636533	0.429937
21.2	0.63887	0.45489
21.2	0.640376	0.449135
21.2	0.642019	0.43761
21.2	0.640098	0.447217
21.2	0.639413	0.464481
21.2	0.635303	0.43761
21.2	0.63969	0.456808
21.3	0.645554	0.466119
21.3	0.634368	0.447011
21.3	0.639278	0.450845
21.3	0.641736	0.460391
21.3	0.640647	0.448936
21.3	0.636962	0.466119
21.3	0.63969	0.454664
21.4	0.635749	0.444938
21.4	0.641452	0.454439
21.4	0.636564	0.45634
21.4	0.63344	0.458255
21.4	0.637923	0.460156
21.4	0.637785	0.454439
21.4	0.640774	0.450639
21.4	0.639006	0.448738
21.5	0.640094	0.440961
21.5	0.638195	0.43907
21.5	0.636303	0.433395
21.5	0.636305	0.448527
21.5	0.641175	0.461783
21.5	0.6359	0.461783
21.5	0.636848	0.450434
21.5	0.638202	0.465566
21.6	0.634707	0.446466
21.6	0.636856	0.440818
21.6	0.628383	0.429506
21.6	0.633359	0.453997
21.6	0.635784	0.442701
21.6	0.637664	0.45588
21.6	0.636049	0.440802
21.6	0.633494	0.452114
21.7	0.636334	0.466897
21.7	0.632451	0.448157
21.7	0.63888	0.436912
21.7	0.638477	0.444409
21.7	0.632315	0.457527
21.7	0.637407	0.455653
21.7	0.632317	0.444409
21.7	0.629236	0.440645
21.8	0.630351	0.46104
21.8	0.634349	0.455428
21.8	0.630885	0.440489
21.8	0.63248	0.446086
21.8	0.633817	0.46289
21.8	0.631818	0.447966
21.8	0.628216	0.453563
21.8	0.630753	0.453563
21.9	0.629993	0.457062
21.9	0.635304	0.429193
21.9	0.630524	0.442207
21.9	0.629862	0.436621
21.9	0.622957	0.444064
21.9	0.628802	0.451492
21.9	0.630522	0.44035
22	0.627789	0.442045
22	0.629245	0.438348
22	0.629641	0.432788
22	0.629377	0.454985
22	0.623693	0.445727
22	0.627922	0.449439
22	0.631092	0.447591
22	0.630038	0.44203
22.1	0.630607	0.43083
22.1	0.621533	0.441885
22.1	0.626925	0.43451
22.1	0.624029	0.447421
22.1	0.632051	0.434525
22.1	0.629947	0.43267
22.1	0.631657	0.43451
22.1	0.630603	0.452911
22.2	0.625801	0.436231
22.2	0.630904	0.447237
22.2	0.627893	0.436216
22.2	0.628548	0.425225
22.2	0.627766	0.450886
22.2	0.626715	0.427057
22.2	0.626585	0.44539
22.2	0.628155	0.456381
22.3	0.62143	0.443393
22.3	0.626904	0.423318
22.3	0.62534	0.430628
22.3	0.624818	0.437907
22.3	0.62104	0.448864
22.3	0.627033	0.439731
22.3	0.623906	0.445202
22.3	0.621039	0.447055
22.4	0.623847	0.443229
22.4	0.619563	0.439598
22.4	0.617229	0.432321
22.4	0.622937	0.448676
22.4	0.620992	0.441414
22.4	0.624495	0.434152
22.4	0.621901	0.435952
22.5	0.620168	0.426785
22.5	0.620299	0.441259
22.5	0.616941	0.453911
22.5	0.618619	0.462978
22.5	0.622494	0.434015
22.5	0.624818	0.439452
22.5	0.622624	0.437644
22.5	0.622366	0.443067
22.6	0.615112	0.435693
22.6	0.616139	0.435693
22.6	0.617295	0.435708
22.6	0.618193	0.444705
22.6	0.615625	0.412301
22.6	0.621283	0.430295
22.6	0.621285	0.424897
22.6	0.628227	0.437493
22.7	0.617133	0.430191
22.7	0.620208	0.426623
22.7	0.621235	0.424831
22.7	0.615215	0.424816
22.7	0.617524	0.448135
22.7	0.622	0.442746
22.7	0.620339	0.449912
22.7	0.616754	0.430206
22.8	0.617365	0.430102
22.8	0.610607	0.43367
22.8	0.614558	0.422968
22.8	0.618382	0.419386
22.8	0.617106	0.430102
22.8	0.614305	0.440804
22.8	0.614049	0.431886
22.8	0.611247	0.430117
22.9	0.610986	0.435313
22.9	0.614921	0.426463
22.9	0.613143	0.426434
22.9	0.611878	0.431776
22.9	0.612001	0.428224
22.9	0.612384	0.442431
22.9	0.613396	0.422882
23	0.6058	0.433435
23	0.614521	0.435203
23	0.609843	0.438739
23	0.612246	0.429884
23	0.611871	0.42813
23	0.607064	0.445826
23	0.607195	0.447594
23	0.607445	0.44229
23.1	0.610478	0.438615
23.1	0.607203	0.445657
23.1	0.612237	0.41746
23.1	0.607079	0.419235
23.1	0.606198	0.445671
23.1	0.604186	0.443911
23.1	0.608714	0.417475
23.1	0.610098	0.419235
23.2	0.612735	0.417414
23.2	0.606343	0.443736
23.2	0.604966	0.426193
23.2	0.60246	0.447241
23.2	0.607094	0.434971
23.2	0.607722	0.42092
23.2	0.610352	0.410417
23.2	0.608851	0.399885
23.3	0.60324	0.40166
23.3	0.608105	0.419127
23.3	0.605862	0.424349
23.3	0.606609	0.431359
23.3	0.614591	0.419142
23.3	0.607733	0.424363
23.3	0.609976	0.408655
23.3	0.605861	0.417368
23.4	0.601287	0.420812
23.4	0.600912	0.420812
23.4	0.607493	0.417336
23.4	0.601909	0.405157
23.4	0.603021	0.419074
23.4	0.602156	0.413846
23.4	0.599423	0.432991
23.4	0.601661	0.452123
23.5	0.599469	0.417291
23.5	0.599966	0.398241
23.5	0.603428	0.422482
23.5	0.607013	0.432865
23.5	0.604041	0.424213
23.5	0.604662	0.410355
23.5	0.59984	0.417277
23.6	0.604566	0.415508
23.6	0.60161	0.422415
23.6	0.600007	0.420692
23.6	0.601114	0.418969
23.6	0.60099	0.415523
23.6	0.594589	0.418969
23.6	0.599883	0.408616
23.6	0.605179	0.424138
23.7	0.594656	0.413783
23.7	0.598458	0.415485
23.7	0.593303	0.412053
23.7	0.596618	0.413755
23.7	0.596129	0.415471
23.7	0.596251	0.415471
23.7	0.597721	0.39488
23.7	0.598336	0.406906
23.8	0.591547	0.406905
23.8	0.594599	0.401779
23.8	0.599116	0.412031
23.8	0.599607	0.408599
23.8	0.59631	0.415448
23.8	0.598018	0.418866
23.8	0.594109	0.405182
23.8	0.596921	0.408613
23.9	0.594179	0.408605
23.9	0.59345	0.412008
23.9	0.595395	0.408605
23.9	0.597219	0.425635
23.9	0.592842	0.413696
23.9	0.595028	0.418815
23.9	0.596002	0.41371
23.9	0.59734	0.413696
24	0.593521	0.418764
24	0.589041	0.413667
24	0.594609	0.420458
24	0.593153	0.410292
24	0.590859	0.405208
24	0.596546	0.410292
24	0.592668	0.415375
24.1	0.58792	0.411964
24.1	0.59178	0.408589
24.1	0.594796	0.410277
24.1	0.597209	0.417026
24.1	0.592143	0.411964
24.1	0.595038	0.422102
24.1	0.590454	0.413651
24.1	0.593949	0.408575
24.2	0.590534	0.415317
24.2	0.586453	0.422025
24.2	0.584289	0.411942
24.2	0.593655	0.395138
24.2	0.590892	0.408581
24.2	0.592454	0.418678
24.2	0.585252	0.420358
24.2	0.585608	0.40186
24.3	0.587508	0.396859
24.3	0.59074	0.401879
24.3	0.587867	0.420302
24.3	0.590495	0.413608
24.3	0.58595	0.396845
24.3	0.588701	0.413594
24.3	0.593486	0.413594
24.3	0.589301	0.408573
24.4	0.587365	0.390219
24.4	0.589507	0.403552
24.4	0.587245	0.420246
24.4	0.588318	0.410232
24.4	0.587005	0.408566
24.4	0.586529	0.398566
24.4	0.587841	0.401899
24.4	0.580454	0.415246
24.5	0.58188	0.403578
24.5	0.580933	0.416857
24.5	0.584255	0.405238
24.5	0.584254	0.385293
24.5	0.584966	0.396939
24.5	0.585676	0.396939
24.5	0.583779	0.411891
24.6	0.581996	0.415163
24.6	0.578214	0.40855
24.6	0.581286	0.400285
24.6	0.582705	0.396978
24.6	0.580106	0.398631
24.6	0.582704	0.396965
24.6	0.585422	0.403577
24.6	0.582938	0.401951
24.7	0.57776	0.388785
24.7	0.585758	0.395371
24.7	0.578698	0.398664
24.7	0.585757	0.400324
24.7	0.579757	0.400297
24.7	0.583995	0.420081
24.7	0.585641	0.392078
24.7	0.581758	0.3822
24.8	0.581757	0.398696
24.8	0.583397	0.392137
24.8	0.584334	0.398696
24.8	0.587503	0.401976
24.8	0.583863	0.393777
24.8	0.581287	0.400349
24.8	0.581755	0.392137
24.8	0.583281	0.416747
24.9	0.588055	0.406908
24.9	0.584788	0.397108
24.9	0.581289	0.392195
24.9	0.583738	0.387296
24.9	0.575685	0.400361
24.9	0.58047	0.398728
24.9	0.582218	0.382396
24.9	0.578603	0.400361
25	0.583729	0.403653
25	0.581057	0.39388
25	0.578381	0.39876
25	0.584312	0.405267
25	0.582684	0.39388
25	0.587213	0.406907
25	0.584076	0.411787
25	0.581403	0.411787
25.1	0.580246	0.405272
25.1	0.577931	0.405286
25.1	0.577118	0.406906
25.1	0.581285	0.397171
25.1	0.577698	0.416627
25.1	0.584644	0.387437
25.1	0.581407	0.385817
25.2	0.579213	0.392368
25.2	0.579675	0.418214
25.2	0.580942	0.429511
25.2	0.583824	0.398823
25.2	0.584518	0.410132
25.2	0.576672	0.398836
25.2	0.577712	0.405278
25.2	0.583132	0.419815
25.3	0.576459	0.410119
25.3	0.5837	0.408511
25.3	0.578644	0.402082
25.3	0.579105	0.418155
25.3	0.577611	0.403689
25.3	0.57612	0.400474
25.3	0.578874	0.418169
25.3	0.583586	0.416548
25.4	0.582319	0.424528
25.4	0.578542	0.403701
25.4	0.580831	0.403701
25.4	0.575451	0.400486
25.4	0.579456	0.405302
25.4	0.576366	0.411706
25.4	0.578885	0.41332
25.4	0.576139	0.405302
25.5	0.576957	0.402118
25.5	0.580603	0.411686
25.5	0.573309	0.402131
25.5	0.572287	0.408497
25.5	0.576615	0.406902
25.5	0.581514	0.411699
25.5	0.57536	0.406902
25.5	0.576501	0.408484
25.6	0.571862	0.411667
25.6	0.577426	0.418034
[truncated: 60,501 more rows]
